# Supplementary material for: The efficacy comparison on femoral vein hemodynamics and morphology between two types of graduated elastic compression stockings among patients undergoing knee replacement: a single center, double-blind, randomized trial
Source: PeerJ journal article supplement (doi:10.7717/peerj.19070), 2025-03-03
Supplement: supplementary_file_1.xlsx [file supplementary_file_1.xlsx]

## Sheet: Sheet1
number	group	age	height	weight	stock_size	Sbp	dbp	LFVmax_base	LFVmin_base	LFVmean_base	RFVmax_base	RFVmin_base	RFVmean_base	LFVdiameter_base	RFVdiameter_base	SBP_afteroperation	DBP_afteroperation	LFVmax_afteroperation	LFVmin_afteroperation	LFVmean_afteroperation	RFVmax_afteroperation	RFVmin_afteroperation	RFVmean_afteroperation	LFVdiameter_afteroperation	RFVdiameter_afteroperation	LFVmax_after30minstock	LFVmin_after30minstock	LFVmean_after30minstock	RFVmax_after30minstock	RFVmin_after30minstock	RFVmean_after30minstock	LFVdiameter_after30minstock	RFVdiameter_after30minstock	LFVmax_stock_anklepump	LFVmin_stock_anklepump	LFVmean_stock_anklepump	RFVmax_stock_anklepump	RFVmin_stock_anklepump	RFVmean_stock_anklepump	LFVdiameter_stock_anklepump	RFVdiameter_stock_anklepump
1	2	62	155	70	M	132	84	11.8	4.2	5.4	18.7	0	8.7	9.9	10.5	156	95	14.7	8.2	6.7	14.2	8.2	6.9	9.2	8.6	14.5	8	7.2	20.6	15.3	12.1	10.6	11	17.7	14.1	9.5	19.9	16.1	11.4	10.3	10.3
1	2	62	155	70	M	132	84	13.1	3.6	5.7	18.8	0	8.7	9.9	10.5	156	95	13.3	6.8	6.2	18.1	10.4	9.2	9.2	8.6	15	10.9	7.5	21.4	10.1	13.1	10.6	11	17.3	14.1	9.1	18.8	3.6	10.6	10.3	10.3
1	2	62	155	70	M	132	84	14.4	1.8	6.4	20.5	1.6	9.3	9.9	10.5	156	95	13.7	10	6.4	17.8	13.2	9.2	9.2	8.6	15.6	12.5	7.9	20	4.8	12.3	10.6	11	16.3	13.3	8.4	18.9	2	10.5	10.3	10.3
1	2	62	155	70	M	132	84	9.6	0	4.4	19.2	0	8.8	9.9	10.5	156	95	13.5	7.7	6.3	16.9	11.4	8.6	9.2	8.6	14.9	7.6	7.6	20.4	4.4	12.1	10.6	11	17.9	13.3	9.6	20.6	10.9	11.7	10.3	10.3
1	2	62	155	70	M	132	84	10.2	0	4.6	19.2	1.6	8.7	9.9	10.5	156	95	13	8.2	6	16.3	11.8	8.3	9.2	8.6	13.7	6.8	6.9	20.8	2.4	12.7	10.6	11	17.5	13.3	9.3	19.9	2	11.4	10.3	10.3
2	2	83	160	49	M	125	76	7.6	3.7	3.5	8.4	5.5	3.7	10.4	9.4	119	75	22.1	15.4	11.4	21.6	13.2	11.9	9.1	9.4	24.9	17.3	14	14.5	10.9	7	9.3	9.5	19.7	13.2	9	13.4	10	6.1	8.7	9.8
2	2	83	160	49	M	125	76	7.4	3.7	3.4	7.8	5.9	3.4	10.4	9.4	119	75	26.3	18.6	13.7	24	17.7	12.8	9.1	9.4	24.9	14.5	13.2	12	8.2	5.3	9.3	9.5	19.8	15.9	9.1	12.6	9.1	5.7	8.7	9.8
2	2	83	160	49	M	125	76	7.6	4.2	3.4	6.8	4.6	2.9	10.4	9.4	119	75	33.5	21.8	19	26.3	19.5	14.1	9.1	9.4	26.4	5.5	14.5	12.6	9.5	5.6	9.3	9.5	20.4	15	10	12.1	7.7	5.4	8.7	9.8
2	2	83	160	49	M	125	76	7.3	3.7	3.3	8.9	6.4	4	10.4	9.4	119	75	35.6	23.6	20.7	25.5	17.7	13.3	9.1	9.4	28.9	18.6	16.4	12.2	8.6	5.3	9.3	9.5	21.1	16.8	10.5	13.4	9.5	6	8.7	9.8
2	2	83	160	49	M	125	76	6.9	3.5	3	8.1	5.5	3.6	10.4	9.4	119	75	33.4	21.8	19.2	25.2	16.8	13.3	9.1	9.4	27.5	16.4	14.5	13.2	9.1	5.9	9.3	9.5	20.8	15	10.2	12.2	7.7	5.2	8.7	9.8
3	1	71	154	62.5	M	130	75	32.9	19.9	15.8	32.6	14.8	15.3	6.4	7.4	121	68	15.5	12.8	7.5	17.3	3.1	7.6	7.9	6.6	24.9	18.5	11.9	19.3	11.3	8.5	7.7	8.3	33.7	17.4	16.4	32.5	23.1	16.4	5.4	9.1
3	1	71	154	62.5	M	130	75	26.2	15.5	12.8	39.9	16.2	20.9	6.4	7.4	121	68	14.9	9.7	6.8	19.1	11.3	8.7	7.9	6.6	26	17.4	12.5	19.5	14.9	8.5	7.7	8.3	24	16.4	11.2	25.4	17.4	12.4	5.4	9.1
3	1	71	154	62.5	M	130	75	23.9	17	11.5	40	16.2	20.7	6.4	7.4	121	68	14.3	10.8	6.4	18.3	10.8	8.6	7.9	6.6	28	21.5	13.5	20.1	15.4	8.9	7.7	8.3	25.7	21.5	12.7	23.7	16.4	11.1	5.4	9.1
3	1	71	154	62.5	M	130	75	23.6	13.3	11.2	39.3	19.9	20.2	6.4	7.4	121	68	14.3	11.3	6.3	16.8	8.7	7.8	7.9	6.6	28.4	23.1	13.8	22.5	14.7	9.9	7.7	8.3	28.4	21.5	13.6	25.2	17.4	12	5.4	9.1
3	1	71	154	62.5	M	130	75	27	17.7	13.4	39.2	21.4	20	6.4	7.4	121	68	13.7	11.3	6.1	15.3	8.2	7.2	7.9	6.6	27.3	21.5	13.1	22.7	12.3	10.1	7.7	8.3	27.8	18	13	30.3	15.4	14.8	5.4	9.1
4	1	55	163	75	M	143	83	12	0.4	5.4	12.1	0	5.5	10.2	7.6	108	71	15.7	10.3	7.4	12.3	2.6	5.4	9.7	10.7	18.9	12.8	9	16.2	6.7	8.2	8.8	9.3	20.6	7.7	10.8	15.6	8.7	7.7	8.3	9.5
4	1	55	163	75	M	143	83	12.7	5.2	5.8	13.4	0	6.1	10.2	7.6	108	71	16.9	0	8.1	13.5	3.6	5.8	9.7	10.7	19.8	8.2	9.7	15.2	7.7	7.5	8.8	9.3	21.2	9.2	11.2	15	7.7	7.3	8.3	9.5
4	1	55	163	75	M	143	83	11.8	3.6	5.3	12.8	0	5.6	10.2	7.6	108	71	15.4	9.2	7.3	11.3	2.6	4.7	9.7	10.7	18.3	8.7	8.9	15.1	8.2	7.4	8.8	9.3	20.2	9.2	10.3	14.5	9.2	6.7	8.3	9.5
4	1	55	163	75	M	143	83	9.9	5.6	4.5	11.3	14.9	4.9	10.2	7.6	108	71	14.2	2.6	6.7	12.5	1.5	5.4	9.7	10.7	19.4	8.2	9.7	13.9	5.1	6.7	8.8	9.3	18	8.7	9	14.5	8.7	6.8	8.3	9.5
4	1	55	163	75	M	143	83	13	0	5.8	9.5	11.8	4	10.2	7.6	108	71	17.5	12.8	8.6	16	7.2	7	9.7	10.7	19.1	6.7	9.4	14.4	8.2	6.9	8.8	9.3	16.2	9.2	7.6	16	8.7	7.7	8.3	9.5
5	1	61	159	68	M	135	81	23.3	3.5	11.1	28.2	12.2	12.8	7.4	7.9	168	93	23.2	16.4	12	19.8	15.3	10.6	8.9	10.1	18	11.4	9.2	19.9	13.5	10.9	9	9.3	18.8	10.7	9.9	18.1	4.3	9.5	8.1	9.6
5	1	61	159	68	M	135	81	20.9	1.7	10.1	28.3	13.7	20.9	7.4	7.9	168	93	22.3	9.3	11.5	16	6.4	8.2	8.9	10.1	15.7	9.3	7.7	19.9	4.3	10.9	9	9.3	13.9	6.8	6.3	18.5	9.3	10	8.1	9.6
5	1	61	159	68	M	135	81	24.6	3.5	12	28.1	12.2	13.3	7.4	7.9	168	93	22.9	12.5	12.1	15.1	3.6	7.8	8.9	10.1	17.8	11.8	8.8	19.3	9.3	10.6	9	9.3	15.3	7.5	7.5	19.3	5	10.4	8.1	9.6
5	1	61	159	68	M	135	81	19.3	1.7	8.8	25	3.5	11.3	7.4	7.9	168	93	26.4	21	14	14.1	3.2	7	8.9	10.1	17.5	10	8.8	19	12.8	10.3	9	9.3	13.9	7.1	6.7	17.1	11	8.7	8.1	9.6
5	1	61	159	68	M	135	81	23	5.2	10.7	21.3	1.7	11	7.4	7.9	168	93	24.9	10	13.1	13.1	10	6.3	8.9	10.1	17.9	10	9	19.1	11	10.6	9	9.3	15.2	7.8	7.4	16.6	5.3	8.6	8.1	9.6
6	1	63	163	60	S	122	67	28.5	11.8	13.9	22.4	16	11.2	7.7	10.6	130	79	28.3	0	14.9	21.3	0	9.6	6.4	7	42.5	13.9	21.9	27.5	0	14	7	8.6	44.5	26.1	23.9	30.9	0	15.5	7.3	8
6	1	63	163	60	S	122	67	32.9	22.1	16.9	18.3	8.6	8.7	7.7	10.6	130	79	28.9	6	14.4	23.5	0	10.9	6.4	7	49.7	20.9	26.4	26.9	0	12.9	7	8.6	44.4	26.1	23.5	19.5	0	10.6	7.3	8
6	1	63	163	60	S	122	67	24.9	9.6	12.7	21.7	13.5	10.8	7.7	10.6	130	79	26.1	0	12.9	21.4	0	10.6	6.4	7	42.6	17.4	23.5	26.3	3.5	12.4	7	8.6	39.2	26.1	20.1	45.3	19.1	24.9	7.3	8
6	1	63	163	60	S	122	67	22.9	12.5	11.4	22.1	14.3	10.9	7.7	10.6	130	79	27.9	7.6	13.3	26.8	12.1	12.4	6.4	7	45.9	17.4	26	27.1	0	13.2	7	8.6	38.6	26.1	19.5	48.2	22.6	25.3	7.3	8
6	1	63	163	60	S	122	67	20.8	11	10.4	23.4	16.7	11.2	7.7	10.6	130	79	27.2	9.1	13.1	20.6	0	9.6	6.4	7	49.9	8.7	29.7	29.3	0	14.6	7	8.6	40.8	27.8	20.9	40.5	7	20.5	7.3	8
7	1	85	170	75	M	149	70	15.3	0	7.3	15	6.3	6.2	9.1	10.6	131	77	8.6	7.1	3.7	12.5	8.9	5.9	12	11.6	16.4	6.4	7.7	18	7.1	8.9	8.1	11.6	14.8	2.9	7.1	18.3	7.8	9.2	7.2	11.2
7	1	85	170	75	M	149	70	17.3	0	8.5	15.8	12.7	6.5	9.1	10.6	131	77	8.7	7.5	3.7	11.9	7.8	5.5	12	11.6	15.8	6.4	7.9	18.3	6.4	9.1	8.1	11.6	14.9	0.7	7.1	16.5	7.1	8.1	7.2	11.2
7	1	85	170	75	M	149	70	16	0	7.9	12.9	0	5.4	9.1	10.6	131	77	9.2	7.5	3.9	12	6.8	5.6	12	11.6	15.2	2.1	7.4	18.4	6.4	9.1	8.1	11.6	16.3	4.6	7.9	16.4	7.5	8.1	7.2	11.2
7	1	85	170	75	M	149	70	17	2.5	8.3	14.6	3.8	6.1	9.1	10.6	131	77	9.4	7.5	4	12	6.4	5.6	12	11.6	17.1	5	8.6	17.7	0	8.7	8.1	11.6	15.3	0.7	7.3	17.4	5.7	8.6	7.2	11.2
7	1	85	170	75	M	149	70	16.5	2.5	7.7	14.6	5.1	6.2	9.1	10.6	131	77	9.1	6.8	3.9	11.8	6.8	5.5	12	11.6	13.3	2.5	6.1	15.6	6.1	7.6	8.1	11.6	15.4	1.1	7.4	17.3	9.3	8.5	7.2	11.2
8	2	66	162	59	M	146	78	13.6	5.7	6.7	14.5	6.8	7.2	8.3	8.6	122	75	8.8	3.7	4.2	10.6	7.5	4.7	11.5	11.6	24.9	15.2	12.9	16.4	9.5	7.9	10.3	9.2	21.2	12.9	11.3	22.3	15.2	11.4	10.2	8.4
8	2	66	162	59	M	146	78	13.7	7.8	6.4	16	9.3	8	8.3	8.6	122	75	8.7	4.2	4.7	11.8	6.4	5.5	11.5	11.6	25.3	15.8	13.6	15.9	10.6	7.7	10.3	9.2	19.4	13.6	10	18.1	8.2	9.1	10.2	8.4
8	2	66	162	59	M	146	78	14.8	5.7	7.1	14.8	7.1	7.1	8.3	8.6	122	75	10	2.9	4.7	12.5	0	6	11.5	11.6	25.1	16.7	13.3	13.8	7	6.6	10.3	9.2	22.4	13.9	11.3	16.3	8.2	8.1	10.2	8.4
8	2	66	162	59	M	146	78	13.7	7.5	6.3	15	10	7.3	8.3	8.6	122	75	8.6	5.5	3.8	12	0	5.7	11.5	11.6	26.2	18	14.4	12.4	5	5.7	10.3	9.2	22.2	12.3	11.7	16.8	9.2	8.5	10.2	8.4
8	2	66	162	59	M	146	78	14.8	5.3	7.1	16	8.6	7.8	8.3	8.6	122	75	10.3	4.2	4.7	12.6	6.8	5.9	11.5	11.6	24.7	15.5	14	11.9	7	5.4	10.3	9.2	21.7	12.9	11.1	17.6	8.8	9.2	10.2	8.4
9	2	69	152	58	S	130	58	14.5	1.2	6.6	17.2	0.8	9	8.4	8.5	176	74	15.4	3.2	7.6	13.2	1.4	6.6	9.1	10.5	17.3	1.9	8.9	12.9	0.5	6.7	8.8	10.1	14.4	5.9	7.2	17.3	0	8.6	8.7	10
9	2	69	152	58	S	130	58	13.1	5.2	5.8	16.6	0	8.5	8.4	8.5	176	74	13.5	2.5	6.4	13.1	0	6.6	9.1	10.5	16.7	1.9	8.7	13.3	0	7	8.8	10.1	15.1	0	7.7	14.5	0	7.5	8.7	10
9	2	69	152	58	S	130	58	14.2	1.6	6.3	16.6	1.6	8.4	8.4	8.5	176	74	14.1	2	7	12.2	0.2	6.3	9.1	10.5	14.6	1.9	7.1	12.9	0.5	6.4	8.8	10.1	14.7	0.9	7.7	14.6	0	7.7	8.7	10
9	2	69	152	58	S	130	58	14.7	0	6.5	17.9	0.8	9.4	8.4	8.5	176	74	12.8	2.5	6.2	11.8	2.2	5.9	9.1	10.5	13.8	0	6.9	12.4	0.7	6	8.8	10.1	14.9	7.7	7.8	15	0	7.7	8.7	10
9	2	69	152	58	S	130	58	14	2.4	6.2	16.2	0.4	8.1	8.4	8.5	176	74	14.2	3.5	6.9	10.8	0.7	5.4	9.1	10.5	15.6	0.6	8	12.2	0	5.8	8.8	10.1	15.2	0	7.7	12.6	8.6	6.7	8.7	10
10	2	76	160	65	M	133	80	15.1	7.6	6.9	14.3	11.7	6.6	11.9	11	146	86	12	6.6	5.4	12.8	8.8	6.2	10.9	11.1	17.2	10	8	17.2	13.5	8.4	8.5	10.1	18.4	11.4	8.7	19.3	15.7	10.1	8.3	9.6
10	2	76	160	65	M	133	80	13	6.4	5.9	12.9	8.9	5.7	11.9	11	146	86	12.1	5.1	5.6	13.6	9.8	6.6	10.9	11.1	15.9	10.3	7.3	17.7	0	8.8	8.5	10.1	19.2	10	9.3	19.8	17.1	9.5	8.3	9.6
10	2	76	160	65	M	133	80	14.5	8.4	6.7	13	8.9	5.8	11.9	11	146	86	13	5.4	6.2	13.8	10.4	6.6	10.9	11.1	16.1	10.7	7.5	17	12.8	8.4	8.5	10.1	18.6	11.4	8.8	18.9	15.3	9.1	8.3	9.6
10	2	76	160	65	M	133	80	14.4	7.2	6.6	12.9	6.4	5.8	11.9	11	146	86	13.5	6.9	6.4	12	6.3	5.5	10.9	11.1	15.4	6.8	7.1	15.8	12.1	7.5	8.5	10.1	17.6	10.7	8.3	19.8	15	9.8	8.3	9.6
10	2	76	160	65	M	133	80	13.3	7.2	6	12.4	5.2	5.6	11.9	11	146	86	12.1	6.6	5.4	11.6	8.2	5.3	10.9	11.1	15.7	10	7.3	16.6	12.5	8.1	8.5	10.1	17.6	12.1	8.2	16.6	13.5	8	8.3	9.6
11	2	68	158	61.8	M	98	65	12.3	9.8	6.1	10.5	0	4.9	10.3	9.8	160	92	18.9	10.3	9.5	19.1	9.6	9.5	10.7	9.1	18	10.3	8.8	19.8	6.1	9.2	8.5	7.5	25.4	19.6	12.6	25.3	8.6	13.9	8.9	7.8
11	2	68	158	61.8	M	98	65	12.9	7.9	6.3	7.5	11.7	3.6	10.3	9.8	160	92	17.7	10	8.1	23.2	17.5	11	10.7	9.1	20.6	13.5	10.4	16.9	9.3	7.6	8.5	7.5	23.2	17.1	11.9	26.7	13.5	14.1	8.9	7.8
11	2	68	158	61.8	M	98	65	14.2	1.6	6.8	10.1	0	4.7	10.3	9.8	160	92	21	7.5	9.7	25.3	7.1	11.8	10.7	9.1	23.5	10.7	10.9	18.7	7.1	9	8.5	7.5	21.3	8.9	10.4	25.1	13.9	13.2	8.9	7.8
11	2	68	158	61.8	M	98	65	13	1.9	6.1	9.5	0	4.3	10.3	9.8	160	92	19.9	11	9	24.4	16	12.1	10.7	9.1	29.5	19.2	14.8	18.8	9.3	9	8.5	7.5	26.6	21.7	14.3	27.5	12.8	14.6	8.9	7.8
11	2	68	158	61.8	M	98	65	12.5	1.9	5.8	8.5	0	3.8	10.3	9.8	160	92	26.4	10	13.5	23.3	12.1	11	10.7	9.1	28	20	14.4	18.3	14.3	8.5	8.5	7.5	23.2	14.6	11.8	26	10	13.3	8.9	7.8
12	2	67	160	60	M	128	79	14.8	8.5	7.2	13.1	7.9	5.8	9.6	8.9	135	69	15.2	6.8	7.8	15.9	3.2	7.7	7.7	8.9	15.4	0.4	8.4	13.4	11.8	6.4	7.7	8.2	12.4	0	6	12.5	9.7	6.3	7.6	9.2
12	2	67	160	60	M	128	79	15	9.8	7.4	12.4	7.6	5.5	9.6	8.9	135	69	16.7	0	8.7	15.7	2.9	7.4	7.7	8.9	15.5	0	8.3	14.5	0.7	6.9	7.7	8.2	12.9	0	6.3	11.9	0	5.9	7.6	9.2
12	2	67	160	60	M	128	79	16.3	9.8	8.1	12.3	6	5.4	9.6	8.9	135	69	16.6	1.4	8.8	14.1	2.1	6.6	7.7	8.9	16.1	0.7	8.6	13.6	0.7	6.4	7.7	8.2	14.3	0	7.1	12.3	0	6.2	7.6	9.2
12	2	67	160	60	M	128	79	16.4	11	8.1	12.7	5.7	5.4	9.6	8.9	135	69	17.9	0.7	9.5	13.8	0.7	6.3	7.7	8.9	15.4	0	8	14.9	0.7	7.1	7.7	8.2	13.5	0	6.7	11.5	0	5.7	7.6	9.2
12	2	67	160	60	M	128	79	17.5	10.7	8.7	11.5	3.2	4.8	9.6	8.9	135	69	17.3	0	9.2	14.7	0.7	6.6	7.7	8.9	17	0	9.1	14.2	0.7	6.6	7.7	8.2	13.4	0	6.6	12.1	0	6	7.6	9.2
13	1	66	150	68	M	107	74	18.1	0	8.8	14	0	6.8	11.3	9.8	124	86	13.5	0	5.7	16.9	2.7	7	8.4	7.7	19.6	16.1	8.2	28.4	18.7	13.4	8.6	7.8	21.2	4	9.3	23.2	16.1	10.9	8.9	8.1
13	1	66	150	68	M	107	74	16.6	0	7.9	13.9	0.6	6.9	11.3	9.8	124	86	13.6	0	5.8	17.8	0	7.5	8.4	7.7	22	13.4	9.8	24.2	12	11.2	8.6	7.8	22.7	5.4	10.2	25.6	18.7	12.6	8.9	8.1
13	1	66	150	68	M	107	74	15.1	0	7	11	6.9	5.4	11.3	9.8	124	86	17.9	0	7.8	16.9	0	7.2	8.4	7.7	19.1	13.4	8.3	28.4	16.1	14.3	8.6	7.8	20.3	5.4	8.9	25	17.4	12	8.9	8.1
13	1	66	150	68	M	107	74	16.3	0.9	7.7	12.7	0	6.3	11.3	9.8	124	86	16.5	0	7.1	17.7	6.7	7.6	8.4	7.7	19.8	12	9.1	25.6	6.7	13.1	8.6	7.8	26.6	10.7	12.2	23	12	10.6	8.9	8.1
13	1	66	150	68	M	107	74	17	0	8.1	13.6	0	6.9	11.3	9.8	124	86	15.1	0	6.4	16.9	6.7	7.1	8.4	7.7	18.6	12	8.3	27.1	12	14.2	8.6	7.8	19.6	5.4	8.2	22.1	9.4	10	8.9	8.1
14	2	60	158	85	XL	124	76	17.4	11.4	8	32.8	13.6	17.2	10.2	7.5	135	87	17.8	0	7.6	15.6	0	6.9	9.7	7.9	19.6	1.3	8.5	21.8	12	10.1	8.5	8.4	17.7	2.7	7.9	22.5	4	10.4	9.5	8.7
14	2	60	158	85	XL	124	76	18.8	13.2	9.2	31.6	15	16.7	10.2	7.5	135	87	17.9	4	8	17.9	1.3	8.5	9.7	7.9	25	10.7	11.4	29.6	13.4	14.7	8.5	8.4	21.7	2.7	10.5	26.2	10.7	12.4	9.5	8.7
14	2	60	158	85	XL	124	76	19.7	3.2	9.9	22.6	0	11.7	10.2	7.5	135	87	16.1	0	7.2	18.7	2.7	8.9	9.7	7.9	20.7	8	9.4	23	1.3	11.1	8.5	8.4	18.6	4	8.5	30.1	12	14.1	9.5	8.7
14	2	60	158	85	XL	124	76	16.6	9.1	8	19.7	0	10.1	10.2	7.5	135	87	15.3	1.3	6.7	18.1	5.4	8.3	9.7	7.9	23.5	5.4	10.9	25.4	4	12.5	8.5	8.4	20.6	0	10	26.1	10.7	12.1	9.5	8.7
14	2	60	158	85	XL	124	76	20.5	13.2	10.3	18	0	9.1	10.2	7.5	135	87	15.7	6.7	6.7	19.9	10.7	8.9	9.7	7.9	22.1	8	9.9	26.6	6.7	13.2	8.5	8.4	19.4	4	9.2	25.9	9.4	12.3	9.5	8.7
15	1	67	150	65	M	136	75	14.7	8.5	7.1	16.5	7.6	8	11.2	12.4	187	90	11.7	3.5	5.1	14.9	7.3	6.9	11.1	12	13.6	10.5	6.8	11.4	6.4	5.6	11.1	11.8	11.6	8.6	5.6	12.3	9.4	6.2	10.7	10.8
15	1	67	150	65	M	136	75	14.8	8.2	7	18.6	7.3	9	11.2	12.4	187	90	15.3	7.6	7.5	13.6	8.2	6.4	11.1	12	12.1	9.2	5.7	11.2	6.4	5.4	11.1	11.8	11.5	9.2	5.7	10.7	7.2	5.4	10.7	10.8
15	1	67	150	65	M	136	75	15.2	7.3	7.1	24.6	13.3	12.1	11.2	12.4	187	90	16	6.9	7.7	12.6	3.5	6	11.1	12	12.1	9.6	5.9	10.2	5.5	4.9	11.1	11.8	10.5	8.1	5	10.8	6.4	5.3	10.7	10.8
15	1	67	150	65	M	136	75	15.6	8.5	7.4	24	12.9	11.4	11.2	12.4	187	90	16.5	8.5	8	13.4	5.1	6.2	11.1	12	12	9.6	6	10.8	7	5.2	11.1	11.8	10.9	8.3	5.1	10	6.8	4.8	10.7	10.8
15	1	67	150	65	M	136	75	14.3	7.3	6.7	24.4	12.9	11.4	11.2	12.4	187	90	17.8	9.5	8.9	13.7	1.9	6.2	11.1	12	12.9	9.6	6.5	10.1	5.9	4.8	11.1	11.8	12	9.9	5.8	10.3	4.2	5.1	10.7	10.8
16	1	71	150	68	S	155	76	14.7	9.2	7.3	16.5	8.5	7.6	11.1	9.8	148	94	12.1	7.2	6.2	11.1	8.3	5.4	11.1	10	7.9	0	3.5	8.9	7.2	4	11.7	11.6	10.1	6.1	4.9	9	7.5	4.1	11.2	10.5
16	1	71	150	68	S	155	76	13.5	9.2	6.7	16.8	7.3	8.6	11.1	9.8	148	94	9.8	5.9	4.8	11.2	8.1	5.4	11.1	10	8.3	4.8	3.7	8.9	7.2	4	11.7	11.6	9.4	5.9	4.5	9.5	8.1	4.4	11.2	10.5
16	1	71	150	68	S	155	76	14.1	9.2	6.9	18.6	6.6	9.7	11.1	9.8	148	94	9.8	6.4	4.8	10.1	7.5	4.8	11.1	10	8.3	5	3.8	8.9	7	4.1	11.7	11.6	8.9	6.1	4.2	9.8	7.9	4.5	11.2	10.5
16	1	71	150	68	S	155	76	14.7	8.5	7.2	16.8	5.4	8.5	11.1	9.8	148	94	9.6	5.9	4.7	10.3	7.7	4.9	11.1	10	8	4.8	3.6	9.2	7.5	4.2	11.7	11.6	8.5	5.3	4	9.7	8.1	4.5	11.2	10.5
16	1	71	150	68	S	155	76	14.5	9.8	6.9	17.8	8.5	8.9	11.1	9.8	148	94	8.8	4.4	4.2	10	7.5	4.7	11.1	10	8.2	5	3.7	8.6	6.6	3.9	11.7	11.6	8.4	5.7	3.9	10	8.3	4.7	11.2	10.5
17	2	69	163	65	M	153	78	17.6	7.8	9.1	15.2	0.4	8.1	9.9	10.5	161	80	21.5	13.6	10.6	21.3	11.8	10.3	10.7	10.3	19.4	10.9	9.6	26.9	13.2	12.6	10.1	9.4	15.8	6.8	7.7	23.8	14.1	12.5	10.7	9.2
17	2	69	163	65	M	153	78	18.1	9.6	9.1	13.7	0	7.1	9.9	10.5	161	80	20.2	11.4	9.9	21.3	14.1	9.9	10.7	10.3	16.6	10.4	7.8	25.5	15.9	12	10.1	9.4	17.2	7.7	8.4	24.6	14.1	13.2	10.7	9.2
17	2	69	163	65	M	153	78	18.9	10.3	9.5	15.3	0.4	8.2	9.9	10.5	161	80	19.3	11.8	9.7	24.7	16.4	11.8	10.7	10.3	15.2	11.8	7.2	24.3	5.9	11.1	10.1	9.4	16.2	8.6	7.8	24.5	13.6	12.9	10.7	9.2
17	2	69	163	65	M	153	78	17.5	9.6	8.8	14.1	1.1	7.3	9.9	10.5	161	80	20.1	13.2	10.3	24.4	12.3	11.5	10.7	10.3	16.3	11.4	7.7	26.1	12.3	11.8	10.1	9.4	16.8	1.4	8	22.6	14.5	11.5	10.7	9.2
17	2	69	163	65	M	153	78	17.6	10	9	15.1	6.4	8	9.9	10.5	161	80	20.1	9.5	10.2	25.7	13.6	12.2	10.7	10.3	16.2	9.1	7.4	22.9	10.4	10.3	10.1	9.4	17	10	7.8	23.1	12.7	11.5	10.7	9.2
18	1	67	161	90	L	168	95	16.4	0.7	8.6	16.6	3.9	8.6	11.4	12.6	171	91	14.7	0	7	13.4	0	6.4	11.6	12.2	12.5	0.5	5.7	13.2	0	5.6	11.6	10.2	19.2	1.3	10	17	0	8.6	11.1	11.7
18	1	67	161	90	L	168	95	15.9	1.4	8.2	14.6	0	7.3	11.4	12.6	171	91	15.6	1.8	7.5	14.5	3.2	7	11.6	12.2	13.6	1.4	6.1	11.6	0.5	4.9	11.6	10.2	16.5	0	8.4	13.4	0	6.8	11.1	11.7
18	1	67	161	90	L	168	95	15.3	1.8	7.8	14.4	0	7.1	11.4	12.6	171	91	15	0	7.1	16	3.2	7.8	11.6	12.2	13.4	2.3	6.1	12.6	2.3	5.4	11.6	10.2	16.8	1.3	8.6	14.6	0	7.2	11.1	11.7
18	1	67	161	90	L	168	95	14.7	2.5	7.5	12.2	14.3	6	11.4	12.6	171	91	13.5	0	6.3	15.8	3.6	7.7	11.6	12.2	12.9	1.4	5.9	11.3	0	4.7	11.6	10.2	16.6	0.7	8.4	14.5	0	7	11.1	11.7
18	1	67	161	90	L	168	95	15.3	1.1	7.9	12.7	2.1	6	11.4	12.6	171	91	13	0	6.1	13.7	0	6.6	11.6	12.2	12.4	0.9	5.5	11.5	0	4.9	11.6	10.2	16.6	1.3	8.4	14.5	0	6.9	11.1	11.7
19	1	74	156	61	S	104	63	10.9	0	4.6	14.6	11.8	6.6	12.6	12.1	186	111	11.1	7.7	4.6	22.8	13.2	11.7	13.6	9.1	11.3	8.2	4.6	20.1	11.8	9.1	10.7	9.8	12	7.7	5.2	17.3	12.3	7.7	11.6	9.5
19	1	74	156	61	S	104	63	11.5	0	4.8	14.7	8.6	6.3	12.6	12.1	186	111	11.3	3.6	4.7	22.6	12.7	11.8	13.6	9.1	9.8	0	3.9	18	11.1	7.9	10.7	9.8	13.2	8.2	5.8	15.8	0	7.1	11.6	9.5
19	1	74	156	61	S	104	63	11.2	11.4	4.9	17	0	7.4	12.6	12.1	186	111	11.2	4.5	4.6	22.7	8.2	11.3	13.6	9.1	9.7	0	3.9	18	11.7	7.9	10.7	9.8	13.2	8.6	5.8	17.7	13.2	8	11.6	9.5
19	1	74	156	61	S	104	63	10.1	11.4	4.3	15.1	0	6.3	12.6	12.1	186	111	11.7	6.4	4.9	22.5	9.5	11.2	13.6	9.1	10.9	0	4.5	18.5	9.8	7.9	10.7	9.8	14.3	5.5	6.3	16.2	10.4	7.3	11.6	9.5
19	1	74	156	61	S	104	63	12.2	0	5.2	15.6	0	6.5	12.6	12.1	186	111	10.7	0	4.4	23.8	14.1	11.7	13.6	9.1	10.1	0	4.1	16.8	11.1	7.1	10.7	9.8	12.7	7.7	5.5	16.9	13.2	7.7	11.6	9.5
20	2	64	158	75	M	150	88	11.6	0	5.5	17	5.7	8.4	11.4	12.2	144	84	18.8	12.3	9.4	19.9	10	10.2	11.7	13.2	14.5	9.1	6.8	17	10.9	8.4	10.9	10.8	12.6	7.3	5.6	18.1	12.7	9.3	11	11.1
20	2	64	158	75	M	150	88	11.1	0	5.2	16.1	6.1	8.1	11.4	12.2	144	84	14.7	9.1	7.2	18.7	11.4	9.4	11.7	13.2	14	7.7	6.2	15	7.7	7.2	10.9	10.8	13.3	8.2	5.9	18.1	12.3	9.1	11	11.1
20	2	64	158	75	M	150	88	11.1	0	5.3	16.5	6.1	7.9	11.4	12.2	144	84	12.1	6.8	5.5	18.4	5.9	9.2	11.7	13.2	14	7.3	6.2	16.4	10.4	7.9	10.9	10.8	12.6	7.3	5.5	18.4	12.3	10	11	11.1
20	2	64	158	75	M	150	88	12.5	2.5	5.9	16.4	6.1	8.2	11.4	12.2	144	84	12.2	8.2	5.6	16.5	6.8	7.9	11.7	13.2	14.2	7.7	6.3	16.3	10.9	7.8	10.9	10.8	12.5	7.3	5.6	18.9	11.8	10	11	11.1
20	2	64	158	75	M	150	88	12.4	2.9	5.9	15	5.3	7.5	11.4	12.2	144	84	12.3	9.1	5.4	17.5	10.9	8.6	11.7	13.2	14.2	7.7	6.3	15.4	10.9	7.3	10.9	10.8	12.7	7.7	5.6	18.4	9.1	9.6	11	11.1
21	1	69	160	73	L	143	78	22.8	16.8	11.2	23.9	14.5	12.4	11.3	9.9	159	82	11.6	8.5	5.2	13.3	10.4	5.9	11.5	9.6	16.7	11.7	7.1	25.4	17.7	11.5	10.2	10.6	20.9	16.9	9.2	18.6	10.9	8.2	9.8	10.1
21	1	69	160	73	L	143	78	18.5	12.7	9	24.7	16.2	12.2	11.3	9.9	159	82	11	8.8	4.8	15.6	11.7	6.9	11.5	9.6	18.2	12.9	7.7	27.6	16.1	12.6	10.2	10.6	23	18.9	10.7	20.3	12.1	8.8	9.8	10.1
21	1	69	160	73	L	143	78	17.9	12.7	8.8	24.9	18	12.1	11.3	9.9	159	82	9.5	6.6	4	15.8	11.7	7	11.5	9.6	18.5	13.7	7.7	26.1	14.1	12.2	10.2	10.6	23.5	19.3	10.9	21.6	13.3	9.3	9.8	10.1
21	1	69	160	73	L	143	78	21.3	16.8	10.3	22.7	15.6	10.7	11.3	9.9	159	82	10.4	6.6	4.4	15.7	12	6.9	11.5	9.6	19.2	13.3	8.1	26.8	14.9	12.6	10.2	10.6	22.9	19.7	10.6	20.5	13.3	8.8	9.8	10.1
21	1	69	160	73	L	143	78	21.8	17.4	10.6	24.4	16.8	12.7	11.3	9.9	159	82	10.9	7.3	4.7	16.1	12.9	7.1	11.5	9.6	18	12.5	7.5	23.4	6	10.6	10.2	10.6	22.7	18.9	10.4	20.2	15.7	8.4	9.8	10.1
22	2	59	159	74	L	135	84	25.6	9.3	12.2	27.9	12.2	13.4	9.8	11.2	143	90	15.2	12.1	6.9	23.1	13.7	10.9	9.8	9.3	13.9	9.7	6.4	19.1	14.5	8.7	8.8	9.8	16.9	11.3	8	21.8	14.9	11.3	9.4	9.7
22	2	59	159	74	L	135	84	19.2	9.3	9.1	25	8.7	12.1	9.8	11.2	143	90	17.3	10.5	8	24	11.7	11.6	9.8	9.3	14.4	11.7	6.7	18.5	12.1	8.4	8.8	9.8	14.7	10.5	6.9	23.8	16.9	12.1	9.4	9.7
22	2	59	159	74	L	135	84	19	11	9	22.6	1.2	11.1	9.8	11.2	143	90	15.7	11.3	7.3	24.4	16.1	12.1	9.8	9.3	13.4	10.5	6.1	19.5	14.1	8.8	8.8	9.8	13.2	8	6.2	23.1	12.5	11.8	9.4	9.7
22	2	59	159	74	L	135	84	19.3	11	9	25.6	0	12.4	9.8	11.2	143	90	15.2	10.1	7.1	25.6	15.3	12.6	9.8	9.3	13.3	9.7	6.1	19.3	14.9	8.8	8.8	9.8	13.7	10.1	6.3	21.8	16.9	11.5	9.4	9.7
22	2	59	159	74	L	135	84	18.2	9.8	8.4	21.1	3.5	10.4	9.8	11.2	143	90	15	8.9	6.9	23.5	16.5	11.4	9.8	9.3	14	10.5	6.4	18.5	14.1	8.3	8.8	9.8	12.3	8	5.7	21.5	12.9	10.8	9.4	9.7
23	2	56	153	71	M	145	97	25.9	19.2	13.5	20.9	14.3	11	9.2	8.9	125	86	17	12.3	8.9	21.8	17.6	11.5	9.6	9.4	16.2	10.9	8.3	18.7	14.3	9.9	9.9	9.9	14.4	9.5	7	16	13.2	8	10.1	9.4
23	2	56	153	71	M	145	97	26.9	18.2	13.9	19.3	11.8	9.6	9.2	8.9	125	86	16.4	10.9	8.7	19.5	12	9.8	9.6	9.4	16.3	9.5	8	20.6	16.5	10.7	9.9	9.9	14.2	10.9	6.8	16.4	12.9	8.6	10.1	9.4
23	2	56	153	71	M	145	97	26.6	18.2	13.6	18.9	12.1	8.8	9.2	8.9	125	86	16.2	11.7	8.6	18.6	13.4	9	9.6	9.4	14.2	8.7	6.8	21.8	17.6	11.4	9.9	9.9	15.2	10.9	7.3	17.6	11.5	9.1	10.1	9.4
23	2	56	153	71	M	145	97	26.6	18.2	13.7	20.4	12.5	9.7	9.2	8.9	125	86	15.7	10.9	8.2	20	13.7	9.9	9.6	9.4	15.5	10.1	7.5	23.7	18.7	13.1	9.9	9.9	14	10.3	6.6	17.7	14.3	9.2	10.1	9.4
23	2	56	153	71	M	145	97	25.4	18.2	13.1	21.1	12.5	9.8	9.2	8.9	125	86	16.8	10.6	8.9	20.3	14	10.1	9.6	9.4	14.5	9.5	6.7	24.2	17.3	14.4	9.9	9.9	15.2	10.9	7.4	17.7	14	9.2	10.1	9.4
24	2	55	169	100	L	108	79	6.8	0	2.7	9.2	0	4	12.2	11.8	102	66	8.2	5.8	3.5	7.6	0	3.5	10.2	11	12.5	8.9	5.5	15.3	10.9	6.7	12.1	11.2	12.1	7.2	5.3	14.5	12.1	6.7	10.9	11
24	2	55	169	100	L	108	79	7.7	0	3.1	8.8	0	3.8	12.2	11.8	102	66	7.6	5.6	3.2	7	4.3	3.1	10.2	11	12.8	8.9	5.7	14	9.7	6.1	12.1	11.2	12.6	9.3	5.5	13.6	10.5	6.1	10.9	11
24	2	55	169	100	L	108	79	6.9	0	2.8	9	0	3.8	12.2	11.8	102	66	7.2	4.9	3.1	6.8	4.9	3	10.2	11	12.5	8.9	5.5	14	9.3	6.3	12.1	11.2	13	10.1	5.7	14	10.5	6.3	10.9	11
24	2	55	169	100	L	108	79	7.1	0	2.9	9.5	0	4.1	12.2	11.8	102	66	7.3	4.5	3.2	7.1	3.9	3.1	10.2	11	11.8	8.4	5.1	13.9	8.9	6.3	12.1	11.2	12.3	9.3	5.3	14	10.9	6.5	10.9	11
24	2	55	169	100	L	108	79	7.6	0	3.1	9.1	0	3.8	12.2	11.8	102	66	7.9	5.8	3.6	9	4.1	4.2	10.2	11	11.6	8.9	4.6	13.8	10.5	6.2	12.1	11.2	11.5	6.8	4.8	13.2	9.3	5.9	10.9	11
25	1	63	164	81	L	105	67	17.1	7.8	8.2	9.1	0	4	10.9	12	153	89	10.8	0	4.6	15.9	3.2	7.2	10.6	12.4	10.6	0	4.6	13.7	0	6.4	9.7	13.2	12.5	1.6	5.5	14.5	0.8	6.5	9.4	12.5
25	1	63	164	81	L	105	67	20.7	10	10	10.9	0	5	10.9	12	153	89	10.4	0	4.5	15.8	1.2	7.3	10.6	12.4	11	0	4.7	13.4	1.6	6.2	9.7	13.2	12.7	2	5.7	15	2	7	9.4	12.5
25	1	63	164	81	L	105	67	20.4	8.2	9.9	9.8	0	4.5	10.9	12	153	89	11.3	0	5	15.4	2.8	7	10.6	12.4	11.8	0.4	5.2	14.5	1.6	6.5	9.7	13.2	11.9	2	5.3	13.6	0	6.2	9.4	12.5
25	1	63	164	81	L	105	67	23.8	5.7	11.7	9.5	0	4.3	10.9	12	153	89	10.8	0	4.7	15.1	2.8	7	10.6	12.4	12.3	0	5.5	14	5.2	6.2	9.7	13.2	11.6	0	5.2	12.9	0	5.9	9.4	12.5
25	1	63	164	81	L	105	67	18	6.8	8.6	10.4	0	4.8	10.9	12	153	89	11.5	0	5.1	14.6	0.8	6.8	10.6	12.4	12.1	5.2	5.4	13.1	1.6	5.9	9.7	13.2	12.9	2	5.9	13.2	1.2	5.9	9.4	12.5
26	1	63	150	63	S	134	88	16	0	7.6	26.5	0	14	8.5	8.4	171	109	17.4	10.7	8	13.3	5.4	6.1	10.5	12	18.6	13.7	8.5	12.8	8.9	0.7	10.5	10.9	14.3	11.3	6.7	13.2	8.2	6.1	10.9	10.6
26	1	63	150	63	S	134	88	15.4	0	7.4	26.5	12.4	14	8.5	8.4	171	109	15.3	7.3	6.8	14.3	6	6.6	10.5	12	19	14.9	8.8	13.3	8.9	6	10.5	10.9	12.8	7.6	5.9	12.8	7.6	6	10.9	10.6
26	1	63	150	63	S	134	88	15.6	0	7.4	22.5	9.2	11.6	8.5	8.4	171	109	15.5	10.1	7.2	13.5	2.8	6	10.5	12	19.1	14.5	9	12.3	8.4	5.4	10.5	10.9	13.7	10.5	6.5	13.1	8.4	6.1	10.9	10.6
26	1	63	150	63	S	134	88	13.6	0	6.4	23.7	10.5	12.3	8.5	8.4	171	109	17.8	11.7	8.7	14	0	6.2	10.5	12	20	16.1	9.9	13	9.7	5.8	10.5	10.9	14.5	12.9	6.8	11.5	7.6	5.2	10.9	10.6
26	1	63	150	63	S	134	88	14	0	6.4	26	13.7	13.6	8.5	8.4	171	109	18.6	13.3	9	15.1	6.6	6.7	10.5	12	19.6	15.7	9.5	12.2	9.3	5.3	10.5	10.9	14.6	12.5	6.8	12.2	6.8	5.4	10.9	10.6
27	2	60	158	75	S	128	77	16.9	7.6	8.4	18.7	6.4	9.1	8.2	10.4	148	71	30.7	24.9	17.3	34	27.2	19.5	10.2	9.3	17.3	13.5	8.7	18.2	12.1	9.6	10.5	11.3	21.5	15.3	10.8	23.7	13.9	12.4	10.3	8.7
27	2	60	158	75	S	128	77	16.9	8	8.7	17.2	6.8	8.3	8.2	10.4	148	71	30.1	26.1	17.1	32.7	22	17.6	10.2	9.3	17.6	13.9	8.9	17.7	12.1	9.1	10.5	11.3	22.6	16.7	11.6	24.2	15.3	12.5	10.3	8.7
27	2	60	158	75	S	128	77	15.9	5.6	8.1	17.6	7.6	8.5	8.2	10.4	148	71	29.7	22	16.2	33.9	25.5	18.4	10.2	9.3	17.9	13.2	8.8	17.6	12.1	9.1	10.5	11.3	22.6	16.4	11.5	23.5	15.3	11.9	10.3	8.7
27	2	60	158	75	S	128	77	16.9	4	8.6	16.8	7.2	8.1	8.2	10.4	148	71	32.6	22	17.8	33.9	23.8	18.4	10.2	9.3	18.3	13.5	9.2	18	12.5	9	10.5	11.3	22.8	17.5	11.6	24.6	15.7	13	10.3	8.7
27	2	60	158	75	S	128	77	16.8	7.2	8.6	17	7.6	8.1	8.2	10.4	148	71	32.4	23.8	17.2	36.4	26.1	20.1	10.2	9.3	18.5	7.5	9.2	19	12.8	9.5	10.5	11.3	22.6	16.7	11.6	25.6	15.9	13.2	10.3	8.7
28	1	63	173	87	S	90	60	12.8	8.6	6	12.7	9.6	6.1	9.7	10.1	136	76	57.4	47.5	31.3	35.6	25.4	17.7	6.2	7.9	35.7	30.9	21.5	31.4	21.7	17.4	6.9	9.1	23.3	16.2	11.9	26.2	18	13.6	7.4	8.3
28	1	63	173	87	S	90	60	13.5	9.6	6.3	13.3	8.6	6.4	9.7	10.1	136	76	59	42.5	32.4	34.5	24.5	17.9	6.2	7.9	36.6	26.7	22.3	30	20	16.5	6.9	9.1	24.4	19.1	12.6	25.8	18.5	13.3	7.4	8.3
28	1	63	173	87	S	90	60	13.6	10.7	6.4	14	10.7	6.8	9.7	10.1	136	76	52.5	42.5	28.8	36.2	26.8	18	6.2	7.9	36.9	30.9	22.1	34.7	26.7	19.3	6.9	9.1	23.6	13.9	12.1	26.2	15.1	13.6	7.4	8.3
28	1	63	173	87	S	90	60	13.8	10	6.4	15.7	10.1	7.7	9.7	10.1	136	76	51.4	37.5	28.2	34.1	23.6	17.8	6.2	7.9	35.8	28.4	21.3	35.1	25	19.2	6.9	9.1	26.3	16.2	13.8	30.6	19.7	16.5	7.4	8.3
28	1	63	173	87	S	90	60	14	9.6	6.5	15.8	10.7	7.9	9.7	10.1	136	76	55.2	44.2	30.8	36.2	25.9	18.9	6.2	7.9	36.7	31.7	22	32.1	22.5	17.8	6.9	9.1	24.1	19.1	12.2	30.4	23.2	16.3	7.4	8.3
29	1	64	156	62.5	M	132	87	18.5	14.1	9.8	19.7	12.5	10	10.1	10.2	171	103	13.1	8.8	5.7	3.7	7.6	6.2	8.8	9.7	20.8	14.5	10.2	16.3	12	8.1	7.8	8.9	18.6	13.3	9.2	13.4	10.7	6.3	9.2	8.1
29	1	64	156	62.5	M	132	87	17.1	10.9	8.9	19	11.7	9.6	10.1	10.2	171	103	12.4	6.6	5.5	12.3	6.6	5.4	8.8	9.7	19.3	14.2	9.5	16.8	12	7.8	7.8	8.9	17.3	12.6	8.5	13.4	8.5	6.4	9.2	8.1
29	1	64	156	62.5	M	132	87	17.6	11.3	9.1	18.6	11.3	9.3	10.1	10.2	171	103	13.7	5.7	6.1	13.8	8.2	6.2	8.8	9.7	19.8	12.9	9.8	15.8	11	7.3	7.8	8.9	17.3	10.7	8.7	13.7	10.7	6.3	9.2	8.1
29	1	64	156	62.5	M	132	87	17.4	12.1	8.9	18.6	12.5	9.2	10.1	10.2	171	103	12.7	6.6	5.6	13.7	7.3	6.1	8.8	9.7	18.3	12.9	8.7	15.7	10.1	7.3	7.8	8.9	16.8	110.7	8.4	14.2	10.7	6.5	9.2	8.1
29	1	64	156	62.5	M	132	87	19	11.7	10	21.4	13.7	10.7	10.1	10.2	171	103	13.2	2.2	5.9	12.8	5.7	5.8	8.8	9.7	17.5	13.3	8.4	16	10.7	7.4	7.8	8.9	16.5	11.4	8	14.6	10.7	6.6	9.2	8.1
30	2	68	165	80	XL	128	72	21.7	13.7	10.9	20.5	11.3	9.6	11.2	12.1	154	74	13.8	6.4	6.7	24.2	7.5	12.9	11.9	12.2	16.5	8.9	8.2	22.6	14.6	11.5	9.3	12.1	16	7.8	8	19.4	13.2	10.1	10	10.6
30	2	68	165	80	XL	128	72	22	13.7	11.2	16.3	7.2	7.5	11.2	12.1	154	74	14.4	3.2	7.3	23.5	7.5	12.9	11.9	12.2	15.6	8.6	7.3	23.1	14.6	11.7	9.3	12.1	14	6.8	6.6	18.7	12.5	9.4	10	10.6
30	2	68	165	80	XL	128	72	22.9	16.5	12	16.8	9.7	7.6	11.2	12.1	154	74	14.6	0	7.4	24.1	10.7	13.4	11.9	12.2	14.7	8.6	6.9	21.4	14.6	11.1	9.3	12.1	16.6	5.7	8.4	19.7	12.5	10.1	10	10.6
30	2	68	165	80	XL	128	72	21.3	13.3	11.1	16	10.9	7.8	11.2	12.1	154	74	15.4	0	7.8	26.8	9.3	15.1	11.9	12.2	14.8	10	6.8	22.5	14.3	11.5	9.3	12.1	14.3	0	7.2	20.2	10.3	9.8	10	10.6
30	2	68	165	80	XL	128	72	23	15.3	11.9	15	9.3	6.9	11.2	12.1	154	74	14.5	0	7.1	26.2	12.1	14.4	11.9	12.2	13.5	8.6	6.2	24	17.5	12.9	9.3	12.1	14	5.7	7	20	11	9.7	10	10.6
31	2	75	158	74	L	131	73	11.1	6.3	4.9	14.3	8.2	6.7	11.4	10	175	97	14.5	9.6	7.2	16.2	7.5	7.7	11.3	9.8	16.7	11	8.3	15.6	11.8	7.9	9.3	9	14.1	9.6	6.6	18.3	12.8	8.8	10.6	9.8
31	2	75	158	74	L	131	73	11.3	7.9	5.1	13.8	7.3	6.4	11.4	10	175	97	14.6	8.6	7.2	16.6	8.6	7.8	11.3	9.8	16.1	11.8	8	16.1	10.3	7.9	9.3	9	16.4	13.2	7.9	19.5	13.9	9.4	10.6	9.8
31	2	75	158	74	L	131	73	10.7	4.1	4.8	12.2	5.4	5.6	11.4	10	175	97	13	6.8	5.9	15.6	9.3	7.2	11.3	9.8	16.3	11.8	8.2	15.8	11.8	7.6	9.3	9	15.8	11.8	7.5	20.1	14.6	9.5	10.6	9.8
31	2	75	158	74	L	131	73	10.5	6.6	4.7	12.9	6.6	6	11.4	10	175	97	12.5	7.1	5.6	15.6	10	7.4	11.3	9.8	16.3	11.4	8.3	16	10.7	7.6	9.3	9	15.6	12.1	7.4	19.9	11.8	9.3	10.6	9.8
31	2	75	158	74	L	131	73	10.3	0	4.7	14.7	9.5	9.5	11.4	10	175	97	12.9	8.2	5.8	14.2	8.6	6.4	11.3	9.8	16.9	12.1	8.7	16.7	12.1	7.9	9.3	9	15.7	10	7.6	19.5	12.5	9.1	10.6	9.8
32	2	46	150	73	M	152	97	25.2	18	12.8	26.8	13.6	14.3	10.4	9.3	148	85	15	12.9	7.5	12.2	9.9	5.7	8.9	8.9	28.3	20	14.2	25.8	18.5	13.2	9.9	7.8	29	18.2	14	20	13.5	10.5	8.4	8.9
32	2	46	150	73	M	152	97	25.1	16.7	11.9	25.1	10.7	12.8	10.4	9.3	148	85	14.8	11.6	7.4	12	8.7	5.6	8.9	8.9	27.3	15.3	13.6	26	18.5	13.3	9.9	7.8	27.3	18.9	13.4	21.5	13.2	11.2	8.4	8.9
32	2	46	150	73	M	152	97	22.9		10.8	27.6	15.8	13.3	10.4	9.3	148	85	15	13.1	7.5	12.3	9.4	5.6	8.9	8.9	28.7	17.1	14.6	26.6	12.5	13.8	9.9	7.8	26.7	15.7	13	22.6	14.3	12	8.4	8.9
32	2	46	150	73	M	152	97	26.3	19.3	12.9	25.9	15.2	12.1	10.4	9.3	148	85	15.9	13.6	8	12.5	9.9	5.7	8.9	8.9	29	17.1	14.9	25.2	16.7	13	9.9	7.8	25.1	15.7	12.4	21.6	13.9	11.3	8.4	8.9
32	2	46	150	73	M	152	97	26.6	18	13.1	26.6	15.2	12.7	10.4	9.3	148	85	15.5	12.6	7.7	11.5	8.7	5.1	8.9	8.9	30.2	21.7	15.3	26.3	18.5	13.5	9.9	7.8	27.9	21	14	23.8	17.5	12.7	8.4	8.9
33	1	62	165	65	M	125	69	17.1	1.1	9	15.7	6.1	8.2	13.6	12.2	119	62	20.9	0	11.4	10.9	9.2	5	13	12.1	15.4	10.9	8	11.7	10.2	5.9	12.2	12.6	10.9	8.9	5.2	11.4	9.7	5.9	12.4	11.9
33	1	62	165	65	M	125	69	21.5	1.1	12.2	17.3	6.1	9.2	13.6	12.2	119	62	21.3	17.6	11.7	11.8	9.9	5.3	13	12.1	16.3	12.4	8.5	12.4	11.1	6.4	12.2	12.6	10.7	8.4	5.1	11.7	9.9	5.9	12.4	11.9
33	1	62	165	65	M	125	69	22.5	1.8	12.8	17.3	5	9.1	13.6	12.2	119	62	22.3	18.3	12.4	11.4	9.7	5.1	13	12.1	15.5	11.6	8.3	12.3	10.9	6.4	12.2	12.6	11.6	9.4	5.7	10.1	8.4	4.8	12.4	11.9
33	1	62	165	65	M	125	69	22.1	0.4	13.2	17.8	3.2	9	13.6	12.2	119	62	22.5	17.8	12.6	11	9.7	4.9	13	12.1	15.8	11.1	8.4	12.8	11.4	6.6	12.2	12.6	11.1	8.9	5.5	9.9	8.4	4.8	12.4	11.9
33	1	62	165	65	M	125	69	22.9	8.6	13.4	17.5	2.9	8.9	13.6	12.2	119	62	23.6	19.3	13.2	11.7	9.4	5.4	13	12.1	16.3	11.6	8.6	11.6	8.4	5.7	12.2	12.6	10.6	8.7	5	9.8	8.7	4.6	12.4	11.9
34	2	74	160	69	M	144	92	12.9	8.7	6.1	11.9	3.5	5.4	13.4	12	171	69	8	5.9	3.5	13.4	9.2	6.4	13	11	9.1	6.4	4.3	8.2	2.8	3.7	11.1	11.3	8.8	7.2	4	10.9	8.6	5.4	10.7	10.5
34	2	74	160	69	M	144	92	13	8.2	6.2	13.8	7.7	6.6	13.4	12	171	69	7.7	5.3	3.4	12.9	9.2	5.7	13	11	9.2	8.3	4.4	8.1	6.4	3.6	11.1	11.3	9.2	7.2	4.2	10.6	6.7	5.1	10.7	10.5
34	2	74	160	69	M	144	92	12.6	8.9	6	14.8	8.4	7.1	13.4	12	171	69	8.6	6.7	3.8	13.6	10.1	6.2	13	11	10	8.1	4.8	8.4	6	3.8	11.1	11.3	9.5	8.3	4.4	9.8	7.1	4.6	10.7	10.5
34	2	74	160	69	M	144	92	12.6	7.8	6	15.1	10.2	7.4	13.4	12	171	69	8.9	6.7	4	13.3	10.1	5.9	13	11	9.6	8.3	4.6	8.7	5.8	4	11.1	11.3	9.6	7.6	4.4	10.2	5.8	4.7	10.7	10.5
34	2	74	160	69	M	144	92	13.4	7.2	6.5	15.2	8.7	7.4	13.4	12	171	69	8.8	7.3	3.9	13.9	10.9	6.4	13	11	9.3	7.4	4.4	8.4	6.7	3.7	11.1	11.3	9.3	7.1	4.2	10.9	7.2	5.1	10.7	10.5
35	1	66	150	65	M	141	79	10.8	2.2	5.1	10.4	4.5	4.9	11.1	12.1	158	85	12.7	6.5	5.7	11	5.5	5.2	10.6	10.8	10.6	6.2	5	9	5	4.2	11.1	11.1	8.8	5.2	4	8.3	3.8	3.7	11.4	11.6
35	1	66	150	65	M	141	79	11.2	2.5	5.3	10.5	5.4	5	11.1	12.1	158	85	11.4	6.5	5.1	10.7	4.3	5.1	10.6	10.8	10.5	6.4	4.9	7.8	3.6	3.6	11.1	11.1	8.6	5	3.9	8.3	4.1	3.6	11.4	11.6
35	1	66	150	65	M	141	79	11.9	1	5.7	12.7	7.7	6.2	11.1	12.1	158	85	10.9	5.8	4.8	11.5	6	5.4	10.6	10.8	10.2	6.2	4.9	7.3	2.9	3.3	11.1	11.1	9.7	5.8	4.5	7.4	2.6	3.1	11.4	11.6
35	1	66	150	65	M	141	79	11.1	2.7	5.2	12.2	5.9	6	11.1	12.1	158	85	11	5.5	4.8	13.1	7.2	6	10.6	10.8	10.2	5.7	4.9	7.4	3.4	3.3	11.1	11.1	9	5.8	4.1	7	3.3	3	11.4	11.6
35	1	66	150	65	M	141	79	10.1	1	4.7	10.9	3.2	5.4	11.1	12.1	158	85	10.8	5.8	4.7	11.9	6	5.5	10.6	10.8	10.7	6.9	5.1	6.9	3.3	3.1	11.1	11.1	8.8	4.5	4.1	7.2	2.2	3.2	11.4	11.6
36	1	73	158	71	XL	108	64	24.6	9.3	12	21.9	1.7	11	10.5	10.7	116	83	16.1	11	7.8	17.1	8.6	8.2	10.5	10.5	35.3	28.6	16.6	21.5	9.7	9.8	10.1	10.5	38.2	31.8	18.6	22.4	14.1	11	11.6	11.2
36	1	73	158	71	XL	108	64	23.6	9.8	12	20.9	1.2	10.3	10.5	10.7	116	83	16.2	11.4	7.6	18.1	6.8	8.4	10.5	10.5	35.8	22.5	16.8	19.4	8.4	8.8	10.1	10.5	41.3	35.4	20.4	24.9	16.9	12.7	11.6	11.2
36	1	73	158	71	XL	108	64	26.8	14.5	14.2	19.6	8.7	9.4	10.5	10.7	116	83	16.5	11	7.9	17.4	4.6	8	10.5	10.5	40.3	35	18.8	22.6	8	10.3	10.1	10.5	42.6	37	20.9	23.6	16.9	12	11.6	11.2
36	1	73	158	71	XL	108	64	28.7	13.3	15.7	19.6	1.2	9.5	10.5	10.7	116	83	17.3	12.8	8.3	17.3	7.1	7.8	10.5	10.5	40.7	34.2	18.8	23.4	4.8	10.6	10.1	10.5	41.6	32.2	20	24.9	14.9	12.8	11.6	11.2
36	1	73	158	71	XL	108	64	27.6	12.7	15	19.4	1.7	9.4	10.5	10.7	116	83	17.6	13.2	8.5	18.3	6.4	8.2	10.5	10.5	41.6	33.8	19.2	15.3	4.8	6.4	10.1	10.5	44	35.8	21.6	26.4	17.7	13	11.6	11.2
37	1	70	155	55	S	159	83	13.5	3.6	5.9	15.1	7.2	7.1	10.1	9.9	162	87	21.2	15.7	10.7	24.5	14.9	12.6	8.9	8.4	14.6	10.7	7.2	18.6	14.5	9	9.5	8.8	18.8	16.4	9.1	13.1	10.5	6.5	10	9.1
37	1	70	155	55	S	159	83	10	0	4.3	13.1	6.8	5.9	10.1	9.9	162	87	21.7	13.7	10.8	23.4	14.5	11.7	8.9	8.4	14.7	11.6	7.1	17.7	13.4	8.5	9.5	8.8	19.2	16.2	9.2	12.2	9.6	5.7	10	9.1
37	1	70	155	55	S	159	83	17.3	5.6	8	12.1	7.2	5.3	10.1	9.9	162	87	22.5	16.1	11.4	24.3	13.3	11.9	8.9	8.4	15	11.8	7.3	14.3	5.5	7	9.5	8.8	19.1	15.8	9.3	10.8	7.5	5	10	9.1
37	1	70	155	55	S	159	83	17.2	10.1	8	8.9	0	3.7	10.1	9.9	162	87	22.5	14.1	11.4	22.2	14.1	10.9	8.9	8.4	15.4	12.9	7.7	17.3	12.5	8.5	9.5	8.8	20.5	17.8	10.1	12.4	8.3	5.8	10	9.1
37	1	70	155	55	S	159	83	16.9	0.47	7.7	12.9	7.2	5.8	10.1	9.9	162	87	22.6	15.3	11.3	22.1	13.3	10.5	8.9	8.4	15.3	12.5	7.6	17.7	12.7	8.5	9.5	8.8	20.9	18.6	10.3	12.2	9.2	5.7	10	9.1
38	2	81	170	72	L	133	72	11.8	4.6	5.4	9.7	6.8	4.4	15.2	14.1	155	78	8.5	0	3.9	10	2.3	4.7	15.9	12.5	24.3	19.6	11.6	12	5.3	5.5	13.8	12.4	12	10.1	5.4	15.3	11.2	7.2	13.5	11.9
38	2	81	170	72	L	133	72	10	5.3	4.4	8.8	5.9	4	15.2	14.1	155	78	8.7	6	3.9	10.3	3.7	4.8	15.9	12.5	24.3	18.2	11.7	12.5	8.1	5.7	13.8	12.4	11.7	8.8	5.2	16.8	12.5	7.8	13.5	11.9
38	2	81	170	72	L	133	72	7.7	3.9	3.5	9.2	5.7	4.1	15.2	14.1	155	78	8.4	0	3.8	10.3	3.1	4.8	15.9	12.5	25.1	19	12	13.3	9.8	6	13.8	12.4	12.3	10.5	5.5	16.4	11.2	7.7	13.5	11.9
38	2	81	170	72	L	133	72	10	5	4.6	8.7	3.7	3.9	15.2	14.1	155	78	9.2	5.4	4.3	10.6	3.3	4.9	15.9	12.5	25.8	19.8	12.3	12.5	8.9	5.6	13.8	12.4	12.3	10.1	5.5	16.5	12.1	7.7	13.5	11.9
38	2	81	170	72	L	133	72	9.5	5	4.4	8.5	5.3	3.8	15.2	14.1	155	78	10.4	6	4.9	9.8	2.1	4.4	15.9	12.5	25.2	19	12	12.9	8.7	5.9	13.8	12.4	13.3	11.2	5.9	16.2	11.4	7.5	13.5	11.9
39	2	69	153	67	M	124	77	14.5	4.4	7.7	17.8	5.3	8.6	12.8	12	135	85	7.7	0.8	3.3	10.1	0.6	4.8	10.3	11.6	14	6.6	6.7	12.5	6.8	6	10.9	10.9	14.5	8.8	6.6	9.1	0.2	4.4	10.7	11.4
39	2	69	153	67	M	124	77	14.1	3.7	7.3	17.3	7.2	8.5	12.8	12	135	85	8.1	0.6	3.6	9.8	0.6	4.5	10.3	11.6	13.1	8.6	6.1	10.5	5.3	4.7	10.9	10.9	13.6	9	6.3	9.1	0	4.4	10.7	11.4
39	2	69	153	67	M	124	77	16.6	5.5	8.9	16.6	6.4	8.4	12.8	12	135	85	8	1.7	3.4	9.6	0	4.4	10.3	11.6	14.3	8.1	6.7	9.3	4.4	4.1	10.9	10.9	13.8	9.4	6.5	9.1	4.2	4.3	10.7	11.4
39	2	69	153	67	M	124	77	16.8	4.4	9.2	16.5	2.4	8.6	12.8	12	135	85	8.5	0	3.7	9.6	0	4.4	10.3	11.6	13.4	8.6	6.3	8.3	4.8	3.6	10.9	10.9	13	4.8	6.1	8.8	3.3	4.1	10.7	11.4
39	2	69	153	67	M	124	77	15.5	3.7	8.3	15.4	4.8	7.9	12.8	12	135	85	8.9	1.7	3.8	8.4	0	3.8	10.3	11.6	15.9	9.9	7.8	8.8	4.2	4	10.9	10.9	14.3	7.5	6.6	8.2	0	3.8	10.7	11.4
40	1	75	150	45	S	107	66	19	5.3	9.2	10.9	1.8	5.7	11	9.9	115	66	15	9.5	7.4	27.7	18.2	13.8	8.8	10.1	15.3	8.8	6.8	26.7	13.6	13	7.5	8.2	18.2	10.1	9.1	10.8	12	9	8.1	8.9
40	1	75	150	45	S	107	66	20	4.6	9.4	12.8	2.6	5.8	11	9.9	115	66	19.3	6.8	10.1	27.1	15	13	8.8	10.1	15	6.9	6.9	33.6	16.4	16	7.5	8.2	22.1	13.3	10.7	19.6	14.8	10	8.1	8.9
40	1	75	150	45	S	107	66	14.3	0.7	6.8	12.9	2.4	5.7	11	9.9	115	66	21	11.4	10.9	27.7	13.6	13.4	8.8	10.1	14.3	8.2	6.5	38.4	23.4	19.6	7.5	8.2	19.3	13.3	9.6	19.3	13.9	10.1	8.1	8.9
40	1	75	150	45	S	107	66	18.7	10.8	8.7	14	5	6.2	11	9.9	115	66	20.8	12.3	10.6	23.5	12.7	11.5	8.8	10.1	13.9	5.7	6.3	41.6	25.9	21.4	7.5	8.2	21.1	13.3	10.5	19.8	13.6	10.5	8.1	8.9
40	1	75	150	45	S	107	66	16.8	2.2	8	11.1	0	5	11	9.9	115	66	23	13.6	11.9	24	11.8	11.3	8.8	10.1	15	6.9	7	43.2	25.6	22.2	7.5	8.2	22	12.9	10.9	19.7	12.6	10.5	8.1	8.9
41	2	74	155	70	S	99	64	10.2	0	4.9	10.2	3.5	4.7	11.4	11.5	145	80	20.8	18	10.8	16.9	14.2	8.5	9.6	8.8	19.4	16.4	9.8	15.5	12.3	7.2	8.7	9.1	20.2	17	10.7	13.1	10.7	6.4	9.5	8.8
41	2	74	155	70	S	99	64	9.9	1.1	4.7	10.2	0.4	4.7	11.4	11.5	145	80	21.6	18	11	17.3	14.5	8.8	9.6	8.8	19.4	14.5	9.9	15.1	12.3	7	8.7	9.1	20.3	12.9	10.7	14.1	10.7	6.7	9.5	8.8
41	2	74	155	70	S	99	64	10.1	0	4.9	10.3	1.8	4.8	11.4	11.5	145	80	20.6	14.8	10.4	17.3	13.3	9.2	9.6	8.8	18.1	15.5	9.2	14.8	11.4	6.7	8.7	9.1	18.7	16.1	9.8	14	10.1	6.5	9.5	8.8
41	2	74	155	70	S	99	64	10.4	3.7	5	11.3	0	5.4	11.4	11.5	145	80	22.1	19.3	11.1	17	13.9	8.6	9.6	8.8	19.4	12.9	10	13.9	10.4	6.3	8.7	9.1	20.6	15.8	11	13.7	10.1	6.4	9.5	8.8
41	2	74	155	70	S	99	64	9.5	0	4.6	9.2	0	4.2	11.4	11.5	145	80	20.6	17	10.4	15.9	10.7	7.8	9.6	8.8	18.8	14.5	9.5	14.2	11.4	6.5	8.7	9.1	19.5	7.6	10.2	13.7	9.8	6.4	9.5	8.8
42	1	73	154	55	S	119	63	16.3	8.6	7.9	10.8	4.8	4.9	8.1	11.8	135	67	16.2	11.4	7.4	17.1	14.2	8.2	7.9	9.5	13.6	9.9	6.2	25	18	12.4	7.3	9.2	14.1	9.9	6.6	24.9	18.6	12	7.4	8.5
42	1	73	154	55	S	119	63	17.8	10.7	8.7	13	6.1	6.1	8.1	11.8	135	67	15.8	11.4	7.2	16.6	13.6	7.7	7.9	9.5	14.3	10.5	6.7	27	18.9	13.9	7.3	9.2	13.7	8.7	6.4	26.5	16.8	12.8	7.4	8.5
42	1	73	154	55	S	119	63	15.6	7.5	7.5	12.7	2.9	6	8.1	11.8	135	67	17.4	12.6	8	16.5	13.3	7.8	7.9	9.5	15.2	8.1	7.3	27.5	18.9	14.1	7.3	9.2	13.7	9.7	6.5	23.3	14.9	11.2	7.4	8.5
42	1	73	154	55	S	119	63	12.6	3.1	6	10.8	3.3	5	8.1	11.8	135	67	17	12	7.8	16.9	14.2	7.9	7.9	9.5	15.8	8.6	7.8	29.3	19.7	14.5	7.3	9.2	14.3	11.6	6.8	23.7	13.6	11.1	7.4	8.5
42	1	73	154	55	S	119	63	14.5	8.3	6.8	15.1	7.2	7.2	8.1	11.8	135	67	17.7	12.6	8	16.8	11.4	7.9	7.9	9.5	19.5	13.4	9.9	27.8	21.7	13.6	7.3	9.2	14.3	10.6	6.8	30.7	20.8	14.6	7.4	8.5
43	1	71	157	72	M	129	64	12	4.8	5.5	10.1	0	4.7	10.2	12.1	134	92	11.3	7.9	5.5	4.4	2.7	1.8	6.4	8.8	8.9	6.4	3.8	9.9	5.5	4.3	6.9	9.4	8.1	5.2	3.6	7.3	5.4	3.1	7	9.6
43	1	71	157	72	M	129	64	14.4	2.4	6.9	8.3	3.5	3.8	10.2	12.1	134	92	12.5	0	5.8	5.4	3	2.3	6.4	8.8	7.9	5.5	3.4	10.5	6.4	4.9	6.9	9.4	7.6	4.9	3.4	12.4	9.8	6.1	7	9.6
43	1	71	157	72	M	129	64	13.8	2	6.5	8.2	0	3.7	10.2	12.1	134	92	12.3	5.8	5.8	4.8	2.7	2.1	6.4	8.8	9	6.6	4	10.7	6.6	4.9	6.9	9.4	8.1	5.4	3.8	11.9	9.4	6	7	9.6
43	1	71	157	72	M	129	64	13	0	6.2	8.5	0	3.8	10.2	12.1	134	92	8.3	6	3.8	4.6	2.5	2	6.4	8.8	7.9	5.7	3.4	9.8	6.1	4.4	6.9	9.4	9.6	6.9	4.6	11.6	9.1	5.7	7	9.6
43	1	71	157	72	M	129	64	12.9	6.4	6	8.5	3.1	3.7	10.2	12.1	134	92	10.8	8.2	5	4.6	2.8	2	6.4	8.8	8.9	6.4	3.9	10.8	7.5	4.9	6.9	9.4	8.5	4.7	4	13	10.5	6.4	7	9.6
44	2	60	167	100	XL	139	83	14.5	7.7	7.2	21.6	2.7	11.4	10.9	8	177	93	12.2	6.1	5.3	16.8	10.3	8.5	13	12.8	12.7	8.2	5.8	12.1	7.9	5.6	13.8	12	11.8	7.3	5.4	17.9	4.1	8.9	13.5	11.7
44	2	60	167	100	XL	139	83	14.7	9.5	7.3	20.9	10	10.9	10.9	8	177	93	13.7	7.5	6.1	15.3	8.2	7.6	13	12.8	13.6	8.2	5.9	11	6.6	5	13.8	12	11.6	3.5	5.2	15.8	2.8	7.9	13.5	11.7
44	2	60	167	100	XL	139	83	14.8	9.1	7.3	18.4	2.7	9.4	10.9	8	177	93	13.6	6.1	6	15.3	6.4	7.4	13	12.8	11.1	6.3	4.8	10.8	6.6	4.9	13.8	12	12.5	7.6	5.6	17.7	8.5	9	13.5	11.7
44	2	60	167	100	XL	139	83	13.2	8.2	6.4	20	4.1	10.2	10.9	8	177	93	14.3	7.5	6.2	14.2	7.5	6.8	13	12.8	10.6	6.3	4.5	11.6	8.2	5.4	13.8	12	13	7.6	5.8	19.1	8.5	9.6	13.5	11.7
44	2	60	167	100	XL	139	83	15.4	9.1	7.5	18.4	0	9.1	10.9	8	177	93	15.5	8.2	6.9	16.7	8.6	8.5	13	12.8	11.5	7.6	4.9	10.4	6.3	4.7	13.8	12	12.8	7.6	5.6	20.3	7.3	10.4	13.5	11.7
45	2	68	172	81	L	145	89	11	2.2	5.3	11.4	0.5	5.6	9.6	11	132	78	19	0	9.6	22.6	0	12.4	11.5	9.6	11.9	9.5	5.6	12.1	8.2	5.4	12	10.6	9.2	6.6	4.1	11.5	8.5	4.9	12.3	11.1
45	2	68	172	81	L	145	89	11.5	1.5	5.6	8.8	0	4.4	9.6	11	132	78	19.2	0	9.6	20	0	10.8	11.5	9.6	11.8	9.5	5.6	11.4	7.9	5	12	10.6	8.9	6	3.9	12	5.7	5.3	12.3	11.1
45	2	68	172	81	L	145	89	12.7	0.7	6.3	12.1	0	5.9	9.6	11	132	78	23.1	0	11.9	14	0	7.4	11.5	9.6	12.2	10.1	5.8	11.4	6.6	5	12	10.6	9.4	6.3	4.2	10.5	5.4	4.6	12.3	11.1
45	2	68	172	81	L	145	89	12	1.7	5.9	9.9	0	4.8	9.6	11	132	78	22.1	10.7	11.4	15.7	0	8.4	11.5	9.6	12.4	9.2	5.9	11.1	6.9	4.8	12	10.6	9.1	6.6	4.1	10.8	5.1	4.6	12.3	11.1
45	2	68	172	81	L	145	89	12.1	6.7	5.9	11.8	1.2	5.8	9.6	11	132	78	21.4	7.1	10.9	18.3	0	9.9	11.5	9.6	12.1	8.8	5.7	12	7.9	5.4	12	10.6	9.1	6	4.1	10.5	5.4	4.3	12.3	11.1
46	1	71	156	59	S	154	67	24	17.7	11.5	15.2	9.5	6.6	11.4	10.1	156	87	16	11.8	7.5	20.4	10.9	9.4	11	9.4	17.6	12.9	7.9	18	11.4	8.9	10.7	9.2	14.4	9.5	7.2	14.4	6.6	7.2	10.3	10
46	1	71	156	59	S	154	67	25.1	20	12.2	17	11.4	7.6	11.4	10.1	156	87	17.3	12.7	8.3	20.7	14.5	9.7	11	9.4	17	13.9	7.7	15.9	11	7.5	10.7	9.2	15.3	10.7	7.5	15.6	10.7	7.8	10.3	10
46	1	71	156	59	S	154	67	22.4	17.3	11.3	16.1	10.4	7.4	11.4	10.1	156	87	16	11.8	7.8	20.7	14.5	10.2	11	9.4	17	13.9	7.8	15.9	11	7.4	10.7	9.2	14.6	10.1	7.1	16.1	11.4	8	10.3	10
46	1	71	156	59	S	154	67	23.4	17.3	11.8	15.4	10.4	7.1	11.4	10.1	156	87	16.4	12.3	8.1	19.6	13.6	9.6	11	9.4	17.4	14.5	8.3	13.6	9.8	6.2	10.7	9.2	14.6	9.8	7.1	16	10.7	8	10.3	10
46	1	71	156	59	S	154	67	22.7	16.8	11.7	15.1	9.5	7	11.4	10.1	156	87	15.3	10.4	7.5	19	13.2	9.1	11	9.4	17.9	7.6	8.8	14.7	10.4	6.8	10.7	9.2	14	8.8	6.8	16	10.1	8	10.3	10
47	1	69	153	60	M	123	70	35	8.2	17.4	24.1	8.5	12.6	8.3	9.4	150	91	19.4	14.1	9.1	31.3	22.1	16.7	7.3	7	21.6	15.4	10.5	29.2	18.6	15.1	7.7	6.9	18.3	12.7	8.9	17.3	10.4	7.9	7.7	6.9
47	1	69	153	60	M	123	70	35.6	17.4	17.5	26.1	13.9	13.6	8.3	9.4	150	91	17.7	13.1	8.2	29.6	14.1	15	7.3	7	22.9	15.4	11.2	27.3	19.5	14.2	7.7	6.9	16.7	12.3	8	18.1	11.8	8.5	7.7	6.9
47	1	69	153	60	M	123	70	38.1	16.4	18.5	23.8	8.8	12.1	8.3	9.4	150	91	17.3	12.9	8	23.3	18.5	11.4	7.3	7	21.7	15	10.3	26.3	18.6	13.4	7.7	6.9	16.6	11.4	8	18.6	11.4	8.8	7.7	6.9
47	1	69	153	60	M	123	70	37.9	20.5	18.4	23.9	9.2	12.3	8.3	9.4	150	91	16.2	11.7	7.4	19.5	14.9	9.1	7.3	7	19.3	15	9.1	26.4	18.6	13.4	7.7	6.9	15.8	10.4	7.3	19.6	15.4	9.4	7.7	6.9
47	1	69	153	60	M	123	70	30	10.7	14.2	21.9	9.2	10.5	8.3	9.4	150	91	15.9	11.7	7.2	18.6	14.1	8.8	7.3	7	16.6	11.8	8.1	24.2	15.9	12.2	7.7	6.9	15.9	11.8	7.5	19.9	13.6	9.6	7.7	6.9
48	2	83	158	75	XL	155	89	14	8.9	7	15	10.1	7	10	9.9	153	84	14.2	0	7.5	10	0	5.1	8.3	8.8	9.1	6.4	4.4	13.4	6.4	6.5	9.4	11.4	19.3	14.5	9.4	11.9	8.1	5.8	8.8	10.9
48	2	83	158	75	XL	155	89	13.7	6.8	6.7	13.1	10.5	6.1	10	9.9	153	84	17.1	12.4	8.8	10.1	0	5.2	8.3	8.8	9.3	2.8	4.6	12.8	7.8	6	9.4	11.4	15.3	12	7.6	10.7	7.8	5.1	8.8	10.9
48	2	83	158	75	XL	155	89	13.8	3.6	6.8	12	7.2	5.5	10	9.9	153	84	14.8	3.5	7.4	10	0.5	5	8.3	8.8	10.5	8.9	5.3	12.1	8.6	5.5	9.4	11.4	15.8	12.3	7.9	10	6.1	4.7	8.8	10.9
48	2	83	158	75	XL	155	89	13.8	4	6.8	13.4	8.9	6.2	10	9.9	153	84	14.3	4.5	7.4	11.6	1.2	6.2	8.3	8.8	10.4	7.5	5.3	12.3	8.6	5.5	9.4	11.4	16.2	13.7	8.1	10	2	4.6	8.8	10.9
48	2	83	158	75	XL	155	89	13.8	8.9	6.8	11.1	8	5	10	9.9	153	84	13.5	1.2	7.1	11.5	1.5	6.3	8.3	8.8	10.2	7	5.1	11.9	6.8	5.2	9.4	11.4	16.6	12.6	8.1	10.4	2	4.8	8.8	10.9
49	1	68	162	77.5	L	109	60	11.2	0	4.7	12.4	5.3	5.3	11.2	10.4	148	87	13.2	7.5	5.7	14.7	7.5	6.5	11.6	11.8	14.7	8.1	6.3	16.5	9.5	7.6	11.5	8.5	16.8	12.6	7.6	23.9	18.4	12.3	10.6	9
49	1	68	162	77.5	L	109	60	12.3	5.7	5.2	13.2	6.8	5.7	11.2	10.4	148	87	13.4	7.5	5.9	16.8	8.6	7.5	11.6	11.8	13.3	8.7	5.9	17	10.6	7.8	11.5	8.5	15	10.6	6.7	22.9	16.8	11.6	10.6	9
49	1	68	162	77.5	L	109	60	14.8	6.8	6.3	13	0	5.6	11.2	10.4	148	87	13	0	5.9	14.8	7.8	6.4	11.6	11.8	13.2	7.3	6.1	18	12.9	8.4	11.5	8.5	14.9	10.6	6.5	22.3	16.5	11.4	10.6	9
49	1	68	162	77.5	L	109	60	12.6	5.7	5.3	11.9	1.8	5	11.2	10.4	148	87	14.4	9.6	6.6	15.2	9.3	6.6	11.6	11.8	13.1	7.8	5.9	18.1	12.6	8.4	11.5	8.5	16.6	11.7	7.4	21.7	17.6	11	10.6	9
49	1	68	162	77.5	L	109	60	11.9	0	5.1	10.3	0	4.4	11.2	10.4	148	87	14.1	9.6	6.4	14.1	8.2	6.1	11.6	11.8	13.6	8.4	6.1	19.8	13.4	9.2	11.5	8.5	15.9	10.9	7	23	15.7	11.7	10.6	9
50	2	67	155	80	M	154	69	9	5.3	4	6.7	4.2	2.8	13.5	14.7	139	78	9.4	7.2	4.6	8.2	6.2	3.7	10.8	12.3	13.8	6.8	6.2	10.7	7.8	4.5	9.8	10.9	13.6	7.5	6.7	11.7	7.8	5.2	10	10.7
50	2	67	155	80	M	154	69	8.7	4.8	3.9	6.4	3.9	2.6	13.5	14.7	139	78	9.3	7.1	4.5	7.9	5.7	3.6	10.8	12.3	13.8	9.3	6.2	9.8	4.6	4.1	9.8	10.9	14.7	8.9	7.1	11.8	8.1	5.3	10	10.7
50	2	67	155	80	M	154	69	8.9	5	3.9	6.2	4.2	2.6	13.5	14.7	139	78	9.5	6.7	4.6	7.6	5.5	3.4	10.8	12.3	13.6	7.1	6	10.2	1.1	4.3	9.8	10.9	14.6	8.4	7.1	12.2	8.7	5.5	10	10.7
50	2	67	155	80	M	154	69	9.3	5.6	4.2	6	1.7	2.5	13.5	14.7	139	78	9.5	7.4	4.5	7	5.2	3.1	10.8	12.3	13	7.1	5.6	10	0	4.2	9.8	10.9	14.3	7	6.8	11.9	8.1	5.4	10	10.7
50	2	67	155	80	M	154	69	9.5	6.4	4.3	6.3	1.7	2.7	13.5	14.7	139	78	8.6	5.8	4.1	6.6	4.6	2.9	10.8	12.3	13.5	7.1	5.8	10.1	0	4.3	9.8	10.9	14.4	7.5	6.9	11.1	6.7	4.9	10	10.7
51	1	64	160	79	L	127	83	14.7	0	6.3	13	10.9	5.7	8.7	9.7	137	84	17.4	13.5	8.1	13.6	11.4	6.2	9.6	10.3	15.2	13.1	7.6	11.4	9.5	5.2	9.7	9.6	13.6	11.5	6.6	11.4	10.1	5.3	9.4	10.5
51	1	64	160	79	L	127	83	12.4	0	5.6	11.8	9.3	5	8.7	9.7	137	84	15.4	12.1	7.4	11.8	9.3	5.3	9.6	10.3	15.3	11.7	7.7	11.3	9.5	5.1	9.7	9.6	13.3	11.2	6.4	10.5	9.2	4.8	9.4	10.5
51	1	64	160	79	L	127	83	11.9	0	5.4	12.4	10.5	5.4	8.7	9.7	137	84	16	12.1	7.9	12	9.3	5.5	9.6	10.3	14.8	12	7.4	11.2	9.2	5.1	9.7	9.6	13.3	11.5	6.4	9.9	8.7	4.5	9.4	10.5
51	1	64	160	79	L	127	83	11.8	0	5.3	11.8	9.7	5.1	8.7	9.7	137	84	16	12.1	7.9	11.9	10.3	5.6	9.6	10.3	14.8	12	7.3	11.8	9.5	5.3	9.7	9.6	13.4	10.6	6.5	9.5	8.1	4.2	9.4	10.5
51	1	64	160	79	L	127	83	11.7	0	5.2	12.4	10.1	5.4	8.7	9.7	137	84	15.4	11.8	7.4	12.8	11	6	9.6	10.3	14	11.2	6.9	11.4	9.2	5.2	9.7	9.6	12.6	10.3	6.9	9.9	8.9	4.5	9.4	10.5
52	2	77	165	70	L	150	75	9.6	2.8	4.5	6.8	0	3	12.6	3.7	158	69	10.2	4	4.5	10.5	6.7	4.8	9.3	9.5	10	0	4.2	11.4	6	4.8	8	9.4	9.9	4.1	4.2	10.2	2.5	4.5	7.9	8.8
52	2	77	165	70	L	150	75	9.9	3.6	4.6	6.9	0	3.2	12.6	3.7	158	69	12	2.6	5.4	10.6	6.4	4.9	9.3	9.5	9.7	1.9	4	11.1	6.3	4.7	8	9.4	10.4	3.8	4.4	9.7	3.2	4.3	7.9	8.8
52	2	77	165	70	L	150	75	9.8	3.9	4.6	6.8	0	3.2	12.6	3.7	158	69	12.8	3.4	5.9	10.6	6.7	4.8	9.3	9.5	9.2	3.2	3.8	11.4	6.9	4.7	8	9.4	10.9	3.2	4.6	9.8	5.4	4.3	7.9	8.8
52	2	77	165	70	L	150	75	10	3.9	4.7	6.6	0	3	12.6	3.7	158	69	12.8	3.3	6	10.8	6	4.9	9.3	9.5	9.3	5.4	3.9	11.6	7.3	4.8	8	9.4	11	1.6	4.7	9.6	0	4.2	7.9	8.8
52	2	77	165	70	L	150	75	9.5	3.4	4.4	7.1	0	3.2	12.6	3.7	158	69	12.7	2.2	6	10.8	5.3	4.9	9.3	9.5	8.9	2.5	3.7	11.6	5.4	4.8	8	9.4	11	1.6	4.7	9.4	5.4	4.1	7.9	8.8
53	1	61	170	67	M	141	94	18.8	13.1	9.1	17.8	8.7	8.3	13.5	11.9	127	88	5.2	4	2.2	4	1.5	1.6	15.2	17	11	9.2	5	9.5	8.2	4	13.1	10.8	9.4	7.3	4.1	9.7	7.9	4.1	13.6	10.9
53	1	61	170	67	M	141	94	19.8	12.9	9.8	16.5	8.7	7.9	13.5	11.9	127	88	4.9	3.4	2.1	4.1	2.2	1.7	15.2	17	10.7	9.2	4.9	10.4	8.2	4.5	13.1	10.8	9.7	7.6	4.2	8.3	6.9	3.4	13.6	10.9
53	1	61	170	67	M	141	94	21.9	16.5	10.9	17.4	9.5	8.3	13.5	11.9	127	88	5	3.3	2.1	3.4	1.4	1.4	15.2	17	9.8	7.6	4.4	8.9	6.9	3.7	13.1	10.8	10.6	8.2	4.7	7.7	6	3.1	13.6	10.9
53	1	61	170	67	M	141	94	22.7	17.6	11.3	16.9	8.7	8.1	13.5	11.9	127	88	4	2.9	1.6	3.7	2.4	1.5	15.2	17	10	7.3	4.5	10.2	8.8	4.3	13.1	10.8	10.6	8.8	4.7	8.1	6.6	3.3	13.6	10.9
53	1	61	170	67	M	141	94	21.7	16.8	10.7	17.5	10.3	8.5	13.5	11.9	127	88	4.4	3.3	1.8	3.5	1.7	1.4	15.2	17	11.1	9.2	5.1	10.2	7.3	4.3	13.1	10.8	9.8	7.6	4.3	8.2	6.6	3.3	13.6	10.9
54	2	76	150	51	S	133	85	11.7	1.7	5.4	10.5	2.5	4.6	11.5	11.9	129	63	15	10.7	7.7	12.9	6.6	5.9	8.8	7.6	16.4	11.3	8.2	16.4	1.6	7.5	9.4	9	16.9	10.1	8.5	14.5	8.9	6.9	8.5	8
54	2	76	150	51	S	133	85	12.2	0	5.6	10.2	0	4.6	11.5	11.9	129	63	15.4	11.4	7.9	12.4	8.2	5.6	8.8	7.6	16.8	10.9	8.4	17.2	7.6	7.9	9.4	9	17.5	12.5	8.8	16	9.3	7.5	8.5	8
54	2	76	150	51	S	133	85	11.7	1.7	5.3	12.2	2.5	5.3	11.5	11.9	129	63	14.2	10.4	7.1	12	4.7	5.4	8.8	7.6	16	12.1	8	17.1	5.6	7.9	9.4	9	17.6	13.7	8.9	15.5	7.2	7.2	8.5	8
54	2	76	150	51	S	133	85	12	2.2	5.5	12.7	0.6	5.5	11.5	11.9	129	63	14.4	2.2	7.2	11.9	7.9	5.4	8.8	7.6	15.8	10.5	7.9	17.5	10.5	8.4	9.4	9	17.4	7.6	8.8	16.2	10.9	7.5	8.5	8
54	2	76	150	51	S	133	85	11.5	0	5.2	11.8	2.5	5.1	11.5	11.9	129	63	14	5.4	6.9	12.1	6.3	5.5	8.8	7.6	15.6	9.7	7.7	17.1	5.6	8.4	9.4	9	18.1	13.7	9.2	15.9	10.1	7.4	8.5	8
55	1	77	160	60	L	140	70	11.6	7	5.1	12.4	5.6	6.3	13.1	14.8	127	66	12	10.3	5.9	10.1	5.9	4.8	10.6	10.7	11.5	9.9	5.7	8.6	6.2	3.9	11.5	10.3	11.4	9.5	5.7	9.8	7.2	4.7	10.6	10
55	1	77	160	60	L	140	70	12.1	8.7	5.4	12.6	5.3	6.4	13.1	14.8	127	66	12	10.1	5.8	10.5	5.9	5.1	10.6	10.7	10.8	9.1	5.3	7.7	5.6	3.4	11.5	10.3	11.7	9.9	5.9	9.7	6.8	4.7	10.6	10
55	1	77	160	60	L	140	70	11.8	7.5	5.2	11.7	7.5	5.9	13.1	14.8	127	66	11.9	10.3	5.8	9.5	6.4	4.6	10.6	10.7	9.7	7.2	4.5	7.2	5.4	3.1	11.5	10.3	12.1	9.9	6.1	10	7.8	4.9	10.6	10
55	1	77	160	60	L	140	70	11.8	8.9	5.2	12.8	3.4	6.5	13.1	14.8	127	66	11.7	9.5	5.6	10.1	7	4.7	10.6	10.7	10.1	8	4.7	7.2	4.3	3.1	11.5	10.3	12.1	9.9	6.1	10.3	8.4	5	10.6	10
55	1	77	160	60	L	140	70	12	8.7	5.3	13.6	7.5	6.9	13.1	14.8	127	66	11.8	10.1	5.7	10.3	7	4.8	10.6	10.7	10.4	8.2	4.9	8.8	6.8	4.1	11.5	10.3	11.9	9.7	6	10.4	8	5.1	10.6	10
56	2	73	175	76	M	132	81	6.3	0	2.9	7.8	0	3.4	12.7	11.7	131	69	12.9	8.1	6.5	19	15.1	10.2	11.9	12.9	12.6	8.8	5.7	14.6	11.5	6.6	12.9	11.8	12.6	9.1	5.9	14.2	11.5	6.4	15	12.7
56	2	73	175	76	M	132	81	6.4	0	2.9	7.2	0	3.2	12.7	11.7	131	69	12.4	7.3	6.1	18.7	13.1	9.8	11.9	12.9	12.5	7.8	5.7	14.5	12.2	6.5	12.9	11.8	12.1	9.1	5.6	14.7	10.5	6.7	15	12.7
56	2	73	175	76	M	132	81	6.1	0	2.7	6.6	0	2.8	12.7	11.7	131	69	12.8	7	6.4	18.8	14.3	9.6	11.9	12.9	12.6	6.1	5.8	15.2	11.5	6.7	12.9	11.8	11.5	8.1	5.3	15.1	12.2	6.8	15	12.7
56	2	73	175	76	M	132	81	7	0	3.1	6.7	0	2.9	12.7	11.7	131	69	12.6	0.3	6.4	19.5	15.7	10.2	11.9	12.9	13.6	9.5	6.3	15.4	11.2	6.7	12.9	11.8	11.6	9.5	5.3	15.1	12.5	6.9	15	12.7
56	2	73	175	76	M	132	81	7.4	1.3	3.3	7.1	0	3.1	12.7	11.7	131	69	13	6.7	6.6	18.8	14	9.8	11.9	12.9	12.6	9.8	5.8	13.7	10.1	5.9	12.9	11.8	11.1	8.4	5.1	15.5	12.8	7.1	15	12.7
57	2	56	170	90	XL	145	93	15.5	8.8	7.2	17.8	0	8.6	12.5	12.8	155	98	12.4	8.9	5.7	11.3	3.2	5.2	9.7	8.5	20.5	17	10.6	16.6	10.1	8.2	11	9.3	39.3	32.8	19.5	15.5	10.7	7.5	11	9
57	2	56	170	90	XL	145	93	14.9	9.5	6.6	19	0	9.3	12.5	12.8	155	98	11.2	8.4	5.1	9.1	0	3.9	9.7	8.5	20.7	18	10.9	15.9	10.7	7.4	11	9.3	37	28.7	18.1	13	7.9	6.1	11	9
57	2	56	170	90	XL	145	93	13.5	8.4	5.8	18.2	2.4	8.8	12.5	12.8	155	98	11.7	8.4	5.3	10.6	3.5	4.6	9.7	8.5	20.9	18.6	10.8	14.6	9.5	6.6	11	9.3	38.1	30	18.4	14	10.7	6.6	11	9
57	2	56	170	90	XL	145	93	12.7	7.4	5.5	17.7	3.4	8.6	12.5	12.8	155	98	10.8	7.9	4.7	10.7	4.7	4.6	9.7	8.5	20.1	16.7	10.2	13.7	6.6	6.1	11	9.3	33.1	26.5	16.2	14	7.9	6.6	11	9
57	2	56	170	90	XL	145	93	14.7	8.1	6.5	16.4	1.4	8.1	12.5	12.8	155	98	11.3	8.2	5	9.5	5.2	4	9.7	8.5	20	17.4	10.1	13.1	7.6	5.7	11	9.3	33.8	25.9	16.5	14	9.8	6.7	11	9
58	1	74	157	86	XL	136	72	22.3	13.1	11.1	10.4	2.2	4.5	9.5	9.6	128	61	12	8.4	6.1	13.4	8.2	6	8.1	7	19.2	13.9	8.9	18.9	13.9	9.4	7.9	9.9	13.9	11	6.6	14.5	9.8	6.4	8.5	8.8
58	1	74	157	86	XL	136	72	21.2	11.5	10.4	11	4.8	4.8	9.5	9.6	128	61	12.4	9.4	6.2	12.2	7.7	5.4	8.1	7	17.8	12	8.3	18.5	12.3	8.9	7.9	9.9	14.2	10.4	6.8	30	24	14.4	8.5	8.8
58	1	74	157	86	XL	136	72	21	10.1	10.6	11.5	6.4	5.1	9.5	9.6	128	61	11.8	9.4	5.7	13.1	6.9	5.9	8.1	7	17.8	11	8.4	19	13.9	9.1	7.9	9.9	14.2	10.7	6.7	29.9	22.4	14.1	8.5	8.8
58	1	74	157	86	XL	136	72	21.2	11.2	10.7	11	5.9	4.9	9.5	9.6	128	61	12	8.4	6	13.3	8.4	5.9	8.1	7	18	12.6	8.5	19.3	13.6	9.2	7.9	9.9	14.9	11.4	7	30	24	13.9	8.5	8.8
58	1	74	157	86	XL	136	72	23	14.3	11.8	10.6	6.1	4.7	9.5	9.6	128	61	11.2	6.9	5.5	12	5.2	5.5	8.1	7	17.3	12.6	8	18.8	12.3	8.9	7.9	9.9	15.2	12.3	7.2	29.4	23.7	13.6	8.5	8.8
59	2	53	162	70	L	109	77	19.1	9.5	8.8	17.9	7	8.4	10.7	10.1	146	99	21.4	14.9	9.4	19.6	12.5	8.3	9.2	11	15.2	8.8	6.7	29.2	18	14.2	9.8	8.2	15.1	8.8	6.9	26.1	19.3	12.4	9.7	8.3
59	2	53	162	70	L	109	77	19.5	9.5	8.9	17	7	7.8	10.7	10.1	146	99	20.1	14.5	8.6	18.2	9.7	7.5	9.2	11	15.3	8.5	6.7	28.3	17.7	13.8	9.8	8.2	16.7	10.7	7.7	26.6	19.6	13.1	9.7	8.3
59	2	53	162	70	L	109	77	19.4	10.1	8.8	17	7.5	7.9	10.7	10.1	146	99	20.2	14.5	8.8	18.4	12.9	7.6	9.2	11	14.5	8.8	6.3	28.8	18.9	14.2	9.8	8.2	16.6	10.4	7.8	24.3	16.4	11.8	9.7	8.3
59	2	53	162	70	L	109	77	20.1	10.6	9.3	15.6	5.6	7.6	10.7	10.1	146	99	20.3	14.9	9.2	19.1	10.9	7.9	9.2	11	13.1	8.2	5.7	28.8	18.3	13.6	9.8	8.2	16.7	11.4	7.9	24.8	17.4	12.2	9.7	8.3
59	2	53	162	70	L	109	77	18	9.5	8.3	15	5.6	7.3	10.7	10.1	146	99	21	15.3	9.6	18.6	12.9	7.7	9.2	11	16.5	12	7.2	26.8	16.7	12.2	9.8	8.2	16.9	10.7	8.1	22.1	16.4	10.7	9.7	8.3
60	2	60	161	79	M	139	92	9.5	0	4	11.7	4.1	5.1	12	12.7	178	110	10.1	5.6	4.2	12.5	8	5.5	11.1	11	13.9	8.5	5.8	14.3	12.6	6.9	10.3	9.6	20.9	14.5	9	13.3	9.8	6.3	10.2	9.6
60	2	60	161	79	M	139	92	9.9	0	4.2	11.4	6.8	5	12	12.7	178	110	9.3	0	3.8	12.1	6	5.3	11.1	11	13	8.8	5.5	13.7	11	6.3	10.3	9.6	20.5	14.5	8.9	13.1	9.5	5.9	10.2	9.6
60	2	60	161	79	M	139	92	9.6	0	4	10.1	0	4.4	12	12.7	178	110	7.3	0	2.9	11	7.2	4.7	11.1	11	13.3	8.5	5.7	13	9.5	5.9	10.3	9.6	22.3	15.8	9.1	13	8.5	5.9	10.2	9.6
60	2	60	161	79	M	139	92	9.6	0	4.1	10.6	7.1	4.6	12	12.7	178	110	8.8	0	3.6	11.2	7.2	4.8	11.1	11	11.9	9.2	5	12.5	9.5	5.6	10.3	9.6	19.2	12	7.8	13.1	8.2	5.9	10.2	9.6
60	2	60	161	79	M	139	92	9.6	5.4	4	9.7	5.4	4.2	12	12.7	178	110	10.3	0	4.3	10.8	1.2	4.7	11.1	11	20.6	15.5	9.4	11.9	10.1	5.4	10.3	9.6	17.9	12.9	7.1	12.7	8.8	5.6	10.2	9.6
61	2	57	159	72	M	129	72	16.2	7.5	8.1	19.4	7.5	9.7	9.4	9.3	135	60	9.6	0	4.4	18.3	10.5	8.5	10.7	9.5	18	9.8	8.8	20.2	15.5	10.1	8.6	8.7	17.3	9.8	8.3	27.4	22.4	14.2	10.4	9.9
61	2	57	159	72	M	129	72	15.8	8.1	7.7	17.3	4.8	8.8	9.4	9.3	135	60	9	0	4.1	17.8	8.1	8.2	10.7	9.5	15.3	0	7.5	18.4	11.7	9.1	8.6	8.7	16.7	10.4	8.5	25.3	19.6	13	10.4	9.9
61	2	57	159	72	M	129	72	15.9	6.7	7.5	18.8	7.3	9.7	9.4	9.3	135	60	8.8	0	4	19	10.5	8.7	10.7	9.5	16.7	0	8.3	17.7	11	8.6	8.6	8.7	18.4	13.3	9	25.5	17	12.7	10.4	9.9
61	2	57	159	72	M	129	72	16.2	7.8	7.5	18.4	7.5	9.3	9.4	9.3	135	60	11.2	3.7	5.2	19.2	12.7	9	10.7	9.5	17.9	7.3	8.6	16.5	10.7	8.2	8.6	8.7	17.6	9.2	8.3	24.3	16.1	12	10.4	9.9
61	2	57	159	72	M	129	72	17.2	8.7	7.9	19.5	8.4	9.9	9.4	9.3	135	60	10.3	1.3	4.9	18.6	12.3	8.6	10.7	9.5	22.5	11	11.1	16.6	11	8.1	8.6	8.7	17.2	6.6	8.1	23.7	16.1	11.5	10.4	9.9
62	1	60	153	55	S	141	70	22.7	9.1	11	21.2	2	11	8.2	9.7	141	71	19.8	13.5	9.7	26.2	13.3	13.5	9.2	7.8	22.7	10.7	11	30.6	12.9	15.3	9.5	7.5	20.3	8.8	10	21.5	9.8	10.6	8.7	7.8
62	1	60	153	55	S	141	70	21.2	7.1	10	21.2	1.7	10.7	8.2	9.7	141	71	19.7	13.9	9.5	23.9	12.1	12.3	9.2	7.8	22.9	10.7	1.1	30.9	10.4	15.5	9.5	7.5	21	10.4	10.4	19.7	6.6	9.4	8.7	7.8
62	1	60	153	55	S	141	70	21.6	6.8	10.5	18.7	2	9.1	8.2	9.7	141	71	19.6	15	9.5	20.9	4.3	10.6	9.2	7.8	22.4	9.8	10.9	29.3	11	14.7	9.5	7.5	20.2	10.1	9.6	20.2	6.8	9.5	8.7	7.8
62	1	60	153	55	S	141	70	20.3	3	9.6	19.1	0.3	9	8.2	9.7	141	71	19.8	14.6	9.6	21.8	10.3	11	9.2	7.8	21.4	9.8	10.3	26.8	6.9	13.5	9.5	7.5	20	9.2	9.5	18.9	6.9	8.9	8.7	7.8
62	1	60	153	55	S	141	70	22.3	6.4	10.7	18.4	2.4	8.3	8.2	9.7	141	71	19.9	12.8	9.6	22.7	10.7	11.6	9.2	7.8	21.2	8.2	10.1	27.8	9.5	14.2	9.5	7.5	19.3	9.5	9.2	18.8	7.3	8.6	8.7	7.8
63	1	67	155	57	M	138	89	12	8.4	5.5	12.5	8.2	5.6	9.9	9.8	163	97	13	8.6	6.3	9	7	4	8.9	10.3	10.6	8.3	4.9	7.4	5	3.1	8.1	10.6	9.6	5.5	4.4	8.4	5.3	3.5	9.5	10.5
63	1	67	155	57	M	138	89	12	8.9	5.4	15	10.4	7.1	9.9	9.8	163	97	12.7	9	6.1	7.9	6.6	3.4	8.9	10.3	9.3	7	4.2	6.9	5	3	8.1	10.6	9	5.5	4.1	10	6.6	4.5	9.5	10.5
63	1	67	155	57	M	138	89	13.1	8.9	6.1	16.3	10.9	7.9	9.9	9.8	163	97	11	7.5	5	8	5.9	3.4	8.9	10.3	9.3	7	4.2	7	5.3	3	8.1	10.6	10	5.9	4.7	7.9	5.3	3.4	9.5	10.5
63	1	67	155	57	M	138	89	11.9	8.4	5.5	16.6	10.4	7.9	9.9	9.8	163	97	11.1	7.9	5.1	8.5	6.6	3.7	8.9	10.3	9.8	6.4	4.4	7.1	4.8	3.2	8.1	10.6	9.1	6.1	4.2	7.6	5.5	3.3	9.5	10.5
63	1	67	155	57	M	138	89	12.2	8.4	5.5	16.1	10.2	7.9	9.9	9.8	163	97	10.9	7.7	5	9	6.8	3.8	8.9	10.3	9.3	6.8	4.2	7.6	5.7	3.4	8.1	10.6	9.6	6.1	4.5	7.9	6.4	3.5	9.5	10.5
64	1	66	165	92	L	149	87	4.5	2.9	1.8	5.7	4.2	2.5	8.4	8.9	151	87	8.2	0	3.7	5.9	0	2.5	14.8	14.5	8.6	5.4	3.9	7.7	2.2	3.4	15.2	13.1	6.7	4.3	2.9	9.4	7.3	4.1	15.8	12.4
64	1	66	165	92	L	149	87	4.4	2.6	1.8	6.8	5.3	3.2	8.4	8.9	151	87	7.7	4.5	3.4	7.1	0	3.1	14.8	14.5	9.2	5.4	4.2	8.2	2.8	3.6	15.2	13.1	7.3	4.5	3.2	9.4	6.9	4.2	15.8	12.4
64	1	66	165	92	L	149	87	4.2	2.9	1.7	6.9	5	3.1	8.4	8.9	151	87	7.8	0	3.6	7.1	0	3.1	14.8	14.5	8.6	5.4	3.8	8.2	3.2	3.6	15.2	13.1	7.2	5.1	3.2	9	6.6	4.1	15.8	12.4
64	1	66	165	92	L	149	87	4.4	0.7	1.8	6.7	5	3.1	8.4	8.9	151	87	8	0.3	3.6	6.5	0	2.8	14.8	14.5	9.1	5.7	4	8	5.4	3.5	15.2	13.1	6.8	3.9	3	9.4	7.3	4.3	15.8	12.4
64	1	66	165	92	L	149	87	4.4	0.9	1.8	7.1	5.3	3.3	8.4	8.9	151	87	7.6	3.4	3.3	6.8	0	2.9	14.8	14.5	9.5	6.6	4.2	8.1	4.4	3.5	15.2	13.1	7	4.9	3.1	9.4	7.3	4.3	15.8	12.4
65	2	68	153	70	L	145	94	12.2	1.1	6.1	6.8	0	3.1	9.9	12.1	156	90	10.3	7.1	4.8	7.7	4.1	3.4	11.9	12.8	22.8	11.8	10.6	10.8	8.5	5	9.5	13.1	10	5.2	4.5	7.7	5.2	3.5	10.7	12
65	2	68	153	70	L	145	94	10.9	1.5	5.3	7	0	3	9.9	12.1	156	90	9	3.4	4	7.8	4.5	3.6	11.9	12.8	22.6	13.9	10.4	10.3	8.5	4.7	9.5	13.1	10.1	5.4	4.5	8.7	6.6	4	10.7	12
65	2	68	153	70	L	145	94	11.1	0.7	5.4	7	0	3	9.9	12.1	156	90	9.6	2.8	4.4	7.4	4.1	3.4	11.9	12.8	19.3	13.3	9.1	10.5	8.2	4.8	9.5	13.1	11.3	6.4	5.1	8.7	6.6	3.9	10.7	12
65	2	68	153	70	L	145	94	10.9	3.9	5.3	6.9	0	3	9.9	12.1	156	90	9.3	2.4	4.2	7.4	3.4	3.3	11.9	12.8	18.3	12.3	8.7	10.3	8.2	4.8	9.5	13.1	11.8	6.6	5.4	8.4	6.4	3.8	10.7	12
65	2	68	153	70	L	145	94	11.6	4.2	5.7	5	0	2.1	9.9	12.1	156	90	11.3	5.5	5.1	7.3	1.7	3.3	11.9	12.8	23	16.9	11	9.6	7.9	4.3	9.5	13.1	10.9	6.6	5	8.2	6	3.7	10.7	12
66	2	70	155	72.5	S	155	70	18.6	9.4	9.2	11.4	5.7	5.4	8.6	8.4	158	82	22.9	15.8	12.1	18.8	11.7	9.5	8.2	7.8	15.3	10.5	7.5	11.4	7	5.3	8	8.3	15.3	11.5	7.4	12.7	7	6.2	8.8	7.7
66	2	70	155	72.5	S	155	70	18.4	9.9	9.1	10.6	5.9	5	8.6	8.4	158	82	23.3	16.1	12.1	16.3	6.6	8.3	8.2	7.8	16.1	11.8	8	11.6	6	5.4	8	8.3	14.7	9.9	7.1	12.4	7.2	6.1	8.8	7.7
66	2	70	155	72.5	S	155	70	19.7	10.7	9.9	10	0.4	4.6	8.6	8.4	158	82	22.6	16.1	11.5	16.1	10.4	8.1	8.2	7.8	15.1	10.1	7.3	9.7	5.6	4.4	8	8.3	14.5	10.5	7	12.5	7.2	6	8.8	7.7
66	2	70	155	72.5	S	155	70	19	10.7	9.6	10.6	4.8	5.2	8.6	8.4	158	82	23.9	15.8	12.1	15.7	8.8	7.8	8.2	7.8	15.8	10.9	7.7	10.5	5.6	4.8	8	8.3	16	11.3	7.7	12.6	7.4	6.1	8.8	7.7
66	2	70	155	72.5	S	155	70	19.4	11.8	9.9	9.8	5.3	4.7	8.6	8.4	158	82	23.1	16.1	11.6	16.1	11	8.1	8.2	7.8	15.8	10.7	7.6	9.6	5.2	4.4	8	8.3	15.5	10.9	7.6	12.7	7.6	6.3	8.8	7.7
67	1	88	150	60	M	156	76	7.9	0	3.6	11.3	6.6	5.1	9.9	9.4	142	106	11.4	6.4	5.3	9.7	8	4.5	9	8.3	18	11.4	8.7	12.6	8.9	6.2	6.3	8.6	18.3	12.1	8.4	13.9	10.4	7.1	6.1	9.1
67	1	88	150	60	M	156	76	6.4	0	2.9	10.8	6.3	4.9	9.9	9.4	142	106	11.1	6.6	5.3	9.7	7.4	4.7	9	8.3	15.7	11.4	7.6	12	6.9	6	6.3	8.6	18.8	10.6	8.9	13.2	9.9	6.6	6.1	9.1
67	1	88	150	60	M	156	76	6.9	0	3	10.2	5.4	4.6	9.9	9.4	142	106	11	7.4	5.2	10.1	7.4	4.7	9	8.3	15.3	7.4	7.3	11.6	7.7	5.8	6.3	8.6	17.9	11.9	8.6	13	8.4	6.5	6.1	9.1
67	1	88	150	60	M	156	76	6	0	2.6	9.5	6	4.3	9.9	9.4	142	106	11.5	8.5	5.5	10.3	7.4	5.2	9	8.3	17.8	10.6	8.3	11.3	7.9	5.6	6.3	8.6	17.3	9.9	8.2	12.4	9.2	6.1	6.1	9.1
67	1	88	150	60	M	156	76	7.1	0	3.2	9.8	5.4	4.4	9.9	9.4	142	106	11.1	7.7	5.2	10.4	8.2	5.3	9	8.3	19.9	12.9	9.2	11	7.4	5.4	6.3	8.6	15.9	9.4	7.5	12.3	9.2	6	6.1	9.1
68	1	65	168	93.5	L	141	78	12.6	0.5	5.9	10.4	2	4.7	13	14.5	158	88	9.4	6.1	4.3	7.7	4.8	3.3	13	14.6	11	0	5	10.3	0	4.8	13.6	11.4	15.1	8.1	7.5	16.9	10.3	8.6	12.2	11.7
68	1	65	168	93.5	L	141	78	12	0.7	5.7	9.7	0	4.3	13	14.5	158	88	8.7	6.1	3.9	8	5.5	3.4	13	14.6	9.6	0	4.3	10	0	4.8	13.6	11.4	13.3	8.1	6.5	15.6	9.8	7.8	12.2	11.7
68	1	65	168	93.5	L	141	78	11.3	0.7	5.4	8.8	0	3.9	13	14.5	158	88	10.4	7.7	4.9	8.2	3.9	3.5	13	14.6	10	0	4.6	10	0	4.7	13.6	11.4	12	6.7	5.7	15.4	7.3	7.7	12.2	11.7
68	1	65	168	93.5	L	141	78	14	0	6.8	10	0	4.6	13	14.5	158	88	10.2	7.5	4.7	7.3	4.8	3.1	13	14.6	9.9	2	4.5	10.2	0	4.8	13.6	11.4	10.9	6.1	5	14.1	9.5	7.1	12.2	11.7
68	1	65	168	93.5	L	141	78	12.2	0	5.8	9.7	0	4.4	13	14.5	158	88	9.6	6.6	4.4	7.1	2	3	13	14.6	9.5	0	4.2	10.4	0	4.9	13.6	11.4	11.2	4.8	5.1	15.4	6.4	7.7	12.2	11.7
69	2	71	170	88	L	146	73	10.1	4.8	4.5	13.6	5.6	6.5	12.9	13.2	155	80	12.1	8.4	5.8	13.5	9.4	6.5	14.4	14	12.3	8.4	5.9	15.8	11.7	7.7	14.9	12.5	10.8	8.9	5.2	13	9.2	6.2	14.1	11.6
69	2	71	170	88	L	146	73	9.5	6.4	4.2	10.9	0	5	12.9	13.2	155	80	11.8	8.4	5.4	13.5	9.4	6.5	14.4	14	10.3	7.3	4.7	13.2	9.2	6.1	14.9	12.5	10.9	6.4	5	12.1	7	5.5	14.1	11.6
69	2	71	170	88	L	146	73	9.2	5.9	4.1	11.6	5.3	5.3	12.9	13.2	155	80	10.9	8.7	4.8	13.6	10.4	6.7	14.4	14	10.3	7	4.7	12.1	8.9	5.4	14.9	12.5	11.1	7.5	5	11.7	7.8	5.5	14.1	11.6
69	2	71	170	88	L	146	73	8.5	0	3.8	9.5	0	4.2	12.9	13.2	155	80	11.2	9.2	4.9	12.6	8.7	6.1	14.4	14	10.2	6.7	4.5	10.9	5.9	4.8	14.9	12.5	11.3	8.1	5	12	8.4	5.7	14.1	11.6
69	2	71	170	88	L	146	73	9.9	5.6	4.4	8.7	0	3.8	12.9	13.2	155	80	10.9	7.9	4.8	12.1	8.4	5.6	14.4	14	9.9	7	4.4	11	7.3	4.7	14.9	12.5	10.5	7.8	4.6	11.7	8.9	5.6	14.1	11.6
70	2	83	170	90	XL	138	87	12.4	8.4	6.4	20.1	12.6	10.3	8.2	7.7	153	92	10.1	0.7	4.6	12	5.9	5.8	12.5	10.8	15.5	12	8.1	9.9	4.8	4.4	11.3	10.8	18.6	8.7	9.3	9.9	5.8	4.9	9.7	10.9
70	2	83	170	90	XL	138	87	12.6	7.5	6.5	19.7	14	10.2	8.2	7.7	153	92	8.7	5	3.9	13.3	5.7	6.4	12.5	10.8	15.1	10.9	7.8	10.3	4.8	4.7	11.3	10.8	15.3	6.7	7.8	9.8	5.5	4.8	9.7	10.9
70	2	83	170	90	XL	138	87	12.4	9.5	6.3	19.2	13.1	9.9	8.2	7.7	153	92	8.9	6.2	4.1	12.2	7.2	5.8	12.5	10.8	15	9.5	7.6	9.8	6.4	4.6	11.3	10.8	16.5	5.6	8.4	9.9	4.9	5.1	9.7	10.9
70	2	83	170	90	XL	138	87	11.3	6.4	5.6	18.1	10.9	9.1	8.2	7.7	153	92	8.4	4.5	3.8	13.5	7.7	6.5	12.5	10.8	15.9	12.6	8.2	9.8	5	4.4	11.3	10.8	17.2	13.1	8.9	9.8	6.6	4.9	9.7	10.9
70	2	83	170	90	XL	138	87	11.8	6.1	5.9	16.7	9.2	8.3	8.2	7.7	153	92	6.3	0	2.8	11	4.5	5.1	12.5	10.8	15.4	12.6	7.9	9.8	6.4	4.5	11.3	10.8	16.7	11.7	8.7	10.2	7.4	5.2	9.7	10.9
71	1	67	168	70	M	155	98	12.8	0	6.2	13	6.1	6.5	11.3	12.6	142	92	19.6	12.6	9.8	10.4	8.2	4.8	11.7	12.4	9.2	6.9	4.1	8.2	6.6	3.6	9.1	13.1	8.6	6	3.8	8.1	6	3.4	9.1	13
71	1	67	168	70	M	155	98	12.8	4.8	6.2	11.6	3.1	5.6	11.3	12.6	142	92	18.3	11.8	8.7	10	8.2	4.7	11.7	12.4	9	6.6	4	8.2	6.6	3.6	9.1	13.1	9.8	0.6	4.5	7.8	6.3	3.3	9.1	13
71	1	67	168	70	M	155	98	11.7	0	5.3	12.2	8.4	6	11.3	12.6	142	92	19.9	9.3	9.2	10.5	8.4	5.1	11.7	12.4	8.9	6.6	3.8	8	6.3	3.5	9.1	13.1	9.9	6.9	4.5	7.7	6.3	3.3	9.1	13
71	1	67	168	70	M	155	98	12.3	0	5.5	11.2	4.8	5.5	11.3	12.6	142	92	18.8	12.8	8.7	10.3	7.8	4.8	11.7	12.4	9.2	7.3	4	8.1	6.3	3.5	9.1	13.1	10.5	6.6	4.7	7.2	5.7	3	9.1	13
71	1	67	168	70	M	155	98	14.1	5.6	6.3	11.8	5	5.8	11.3	12.6	142	92	22.6	14	10.4	10.7	8.2	5.1	11.7	12.4	9.3	6.6	4	8.1	6.3	3.5	9.1	13.1	9.3	6.9	4.2	7.4	6	3.1	9.1	13
72	1	76	165	90	L	154	87	7.3	0	3.3	7.7	0	3.4	14.1	14.5	160	93	10.5	6.3	5.2	10.4	0	5	13.2	13.6	11.8	6	5.7	10.3	0.9	5	12.8	13.6	9.6	5.7	4.6	12.8	6.9	6.3	12.3	12.2
72	1	76	165	90	L	154	87	7.2	0	3.3	6.9	0	2.9	14.1	14.5	160	93	10.2	2.5	5.1	10.1	0.6	4.7	13.2	13.6	11.5	6.6	5.6	10.5	2.2	5.2	12.8	13.6	9.7	6.6	4.7	11.6	4.1	5.6	12.3	12.2
72	1	76	165	90	L	154	87	6.6	0	3	6.3	0	2.7	14.1	14.5	160	93	10.9	0.9	5.5	9.8	0	4.5	13.2	13.6	11.3	6.9	5.6	10.5	4.7	5	12.8	13.6	9.7	6.6	4.6	12.1	6.6	5.9	12.3	12.2
72	1	76	165	90	L	154	87	6.3	0	2.8	6.5	0	2.8	14.1	14.5	160	93	11.3	6.9	5.8	8.8	1.9	4	13.2	13.6	11.2	6.9	5.5	10.9	5.4	5.3	12.8	13.6	9.8	3.5	4.7	11.4	4.1	5.5	12.3	12.2
72	1	76	165	90	L	154	87	6.2	0	2.8	6.8	0	3	14.1	14.5	160	93	11.6	6.3	5.7	10.3	3.2	4.8	13.2	13.6	11.6	6.6	5.6	10.9	1.9	5.3	12.8	13.6	9.7	6.6	4.6	11.4	5.7	5.5	12.3	12.2
73	2	65	160	65	L	119	68	12.8	7	6.1	14.8	9.9	7	8.6	10.5	146	85	20.9	15.4	10.2	22.6	15.4	11.7	9.5	9.4	18.1	11.7	8.1	20	14.5	10	6.8	11.5	15	8	6.8	17.7	7.2	9	7.5	10.7
73	2	65	160	65	L	119	68	12.1	5.1	5.7	14.1	9.7	6.5	8.6	10.5	146	85	18.2	11.5	8.7	21.9	14.3	11.4	9.5	9.4	16.9	10.9	7.3	18.1	11.7	9.3	6.8	11.5	13.7	7.2	6	17.7	12.1	8.9	7.5	10.7
73	2	65	160	65	L	119	68	13	5.6	6.3	12.5	6.2	5.7	8.6	10.5	146	85	17.2	10.1	8.2	21.7	15.1	11.4	9.5	9.4	17	11.7	7.4	18.6	9.7	9.7	6.8	11.5	14.1	6.8	6.2	16.3	9.3	8.1	7.5	10.7
73	2	65	160	65	L	119	68	13.3	5.8	6.5	13.9	8.9	6.5	8.6	10.5	146	85	16.2	9.2	7.5	20.9	13.7	11	9.5	9.4	16.1	8.9	7.1	19.2	11.3	10.1	6.8	11.5	14.6	8.9	6.5	16.1	10.9	7.8	7.5	10.7
73	2	65	160	65	L	119	68	12.1	5.6	5.8	13.7	8.2	6.2	8.6	10.5	146	85	16.6	9.2	7.7	21.9	14	11.5	9.5	9.4	16.6	12.1	7.3	18.2	12.1	9.7	6.8	11.5	15.9	9.3	7.1	14.1	5.2	6.7	7.5	10.7
74	1	51	178	79	L	134	94	9.7	0	4.6	15	0	7.2	11.7	7.8	119	83	15.1	5.7	7.5	11.1	0.2	5.3	9.6	10.8	6.9	4.3	3.1	9.3	5.7	4.3	14.5	12.1	9.4	7	4.7	9.9	5.5	5	13	12.4
74	1	51	178	79	L	134	94	11	0	5.3	16.9	2	8.1	11.7	7.8	119	83	14.4	7.9	7.1	9.7	0	4.6	9.6	10.8	8.3	5.8	3.8	9.9	5.5	4.5	14.5	12.1	9.2	7	4.5	10	5.5	5	13	12.4
74	1	51	178	79	L	134	94	9.4	0	4.4	16.3	0	7.8	11.7	7.8	119	83	13.8	4.2	6.8	12.2	1.7	5.7	9.6	10.8	7.3	5.2	3.4	8.7	4.7	4.1	14.5	12.1	8.7	6.4	4.1	8	5	4.9	13	12.4
74	1	51	178	79	L	134	94	9.5	0	4.4	17.2	0	8.4	11.7	7.8	119	83	13.2	5.2	6.5	10.1	1.2	4.6	9.6	10.8	7.1	4.9	3.3	8.4	5.4	4	14.5	12.1	8.9	6.6	4.2	8.3	3.1	3.7	13	12.4
74	1	51	178	79	L	134	94	10.6	0	4.9	18	0	9	11.7	7.8	119	83	14.1	5.7	6.9	10.8	2.2	5.1	9.6	10.8	7.6	5.2	3.5	7.2	5	3.3	14.5	12.1	9.1	6.8	4.3	8.1	5.3	3.7	13	12.4
75	2	83	150	77	S	144	76	7.9	1.1	3.7	7.6	0	3.4	9.6	11.2	148	86	10.7	7.8	4.9	12.7	10.1	6.3	9.4	9.4	9.3	7.3	4.1	12.7	10.4	6.3	8.3	9.1	11	9.2	5	11.6	9.2	5.9	7.5	9.4
75	2	83	150	77	S	144	76	8.3	0	3.9	6.7	0	2.9	9.6	11.2	148	86	9.5	5.9	4.3	12.8	9.5	6.1	9.4	9.4	9.1	7.6	4	12.1	9.5	5.8	8.3	9.1	10.4	8.8	4.6	11.9	6.6	5.8	7.5	9.4
75	2	83	150	77	S	144	76	9.7	1.8	4.7	7.2	0	3.2	9.6	11.2	148	86	10	7.5	4.5	12.2	8.9	5.8	9.4	9.4	8.4	7.3	3.6	12	10.1	5.6	8.3	9.1	10.4	7.9	4.6	11.5	8.8	5.6	7.5	9.4
75	2	83	150	77	S	144	76	8.7	3.5	4.1	7.7	0.9	3.4	9.6	11.2	148	86	9.3	5	4.3	12.4	8.9	5.8	9.4	9.4	8.6	6.3	3.7	11	8.8	4.9	8.3	9.1	10.2	8.2	4.5	11.3	9.2	5.5	7.5	9.4
75	2	83	150	77	S	144	76	8.3	0	3.8	8	5	3.6	9.6	11.2	148	86	9.5	7.3	4.3	13.1	10.9	6.1	9.4	9.4	8.7	6.3	3.8	10.6	8.5	4.7	8.3	9.1	10.2	8.2	4.5	11.2	9.5	5.4	7.5	9.4
76	1	73	152	60	S	106	65	10.6	2	5.1	10.2	0.2	4.7	10.5	11.3	146	62	14.5	2.8	6.5	17.1	5.1	8	8.2	9.3	14.7	2.2	7.4	12.4	3.8	5.7	9.5	9.1	15.9	2.2	7.8	17.7	1.9	8.7	7.4	8.5
76	1	73	152	60	S	106	65	11.4	1.5	5.5	7.6	0	3.4	10.5	11.3	146	62	17.2	4.1	8	13.2	2.5	6.1	8.2	9.3	15.1	2.2	7.5	13	4.7	15.9	9.5	9.1	18.3	2.5	9.2	15.3	2.5	7.3	7.4	8.5
76	1	73	152	60	S	106	65	10.4	1.8	4.9	9.4	0	4.3	10.5	11.3	146	62	14.6	2.8	6.6	14.1	3.2	6.5	8.2	9.3	14.6	0.9	7.2	13.4	5.1	6.2	9.5	9.1	16.3	1.9	8.1	15.6	1.9	7.7	7.4	8.5
76	1	73	152	60	S	106	65	9.5	1.5	4.5	9.2	0	4.2	10.5	11.3	146	62	14.7	3.5	6.6	14.4	0.9	6.7	8.2	9.3	14.4	2.5	7.1	12.3	2.5	5.6	9.5	9.1	15.4	0.9	7.7	16.5	2.5	8.4	7.4	8.5
76	1	73	152	60	S	106	65	10.2	1.8	4.8	8.1	0	3.7	10.5	11.3	146	62	15.5	3.8	7.1	13.1	2.5	6	8.2	9.3	14.3	4.7	7	12.9	1.9	5.8	9.5	9.1	16.1	2.2	8.1	17	1.9	8.6	7.4	8.5
77	2	72	150	77	S	143	84	11.6	0	5.9	18.1	5.2	8.3	9.2	9.8	143	85	14.6	0	7.4	23.6	11.7	11.2	10.2	8.7	14.2	0	6.9	27.1	12.5	13.1	9.2	9.6	13.6	0	6.4	21.9	5.2	10.3	8.9	9
77	2	72	150	77	S	143	84	12.5	0	6.3	17	0	7.4	9.2	9.8	143	85	16.5	0	8	23.6	8	11.1	10.2	8.7	18	0	9	28.6	11.7	14	9.2	9.6	18	0	8.8	19	0	8.8	8.9	9
77	2	72	150	77	S	143	84	12.5	0	6.2	23.2	5.2	10.8	9.2	9.8	143	85	12.1	0	5.7	24.1	9.7	12.3	10.2	8.7	18.8	0	9.2	23	10.9	10.9	9.2	9.6	12.6	0	5.9	16	0	7.4	8.9	9
77	2	72	150	77	S	143	84	13.8	0	7	22.4	8.4	10.4	9.2	9.8	143	85	15.3	0	7.5	21.9	10.1	11.7	10.2	8.7	16.9	0	8.4	29	7.6	13.9	9.2	9.6	18	0	8.9	17.1	8.4	7.8	8.9	9
77	2	72	150	77	S	143	84	12.2	0	6.1	20.3	7.2	9.4	9.2	9.8	143	85	15.6	0	7.7	19.7	7.2	10.4	10.2	8.7	18.1	0	8.7	25.2	10.1	11.9	9.2	9.6	12.9	0	6.2	20.7	7.2	9.7	8.9	9
78	2	69	170	83	M	145	75	5.4	1.7	2.4	6.5	1.7	2.9	14.3	13.1	179	102	8.1	4.5	3.5	8.4	5.4	3.6	10	11.8	7.9	4.7	3.4	8.6	6.2	3.9	8.1	11.4	5.9	4.2	2.4	8	6.7	3.6	9.9	11
78	2	69	170	83	M	145	75	5.5	2.5	2.4	7.5	2.2	3.4	14.3	13.1	179	102	6.5	1	2.7	10	6.2	4.6	10	11.8	9.3	5.9	4.2	8.6	6.7	3.9	8.1	11.4	6.2	4.7	2.6	7.4	5.9	3.2	9.9	11
78	2	69	170	83	M	145	75	5.2	1.9	2.3	6.1	2.5	2.7	14.3	13.1	179	102	7.1	0	3	10.9	6.7	5.1	10	11.8	8.2	4.7	3.7	10.2	8.4	4.7	8.1	11.4	6.8	5.2	2.9	6.8	5.2	2.9	9.9	11
78	2	69	170	83	M	145	75	4.8	1.4	2	4.9	3	2.1	14.3	13.1	179	102	7	0.2	2.9	9.7	6.2	4.4	10	11.8	9.2	2.7	4.3	8.8	6.2	3.9	8.1	11.4	6.3	3.7	2.6	6.5	4.7	2.7	9.9	11
78	2	69	170	83	M	145	75	4.9	1.9	2.1	5.9	1.6	2.5	14.3	13.1	179	102	6.6	0	2.7	11.1	5.9	5.1	10	11.8	9.1	5.4	4.1	8.4	6.9	3.7	8.1	11.4	6.6	5.2	2.7	9.6	7.2	4.3	9.9	11
79	1	65	175	105	XL	125	79	10.7	7.8	4.7	9.3	6.1	4	12.5	12.5	151	95	13.5	11.1	6.3	13.5	10.4	6.7	13.3	13.6	15.7	14.2	7.7	21.2	18	11.4	9.7	11.5	18	11	9	18.2	11	8.3	7.9	12.7
79	1	65	175	105	XL	125	79	11.4	8.4	5.2	8.7	1.1	3.8	12.5	12.5	151	95	13.1	11.4	6.3	13.5	9.4	6.7	13.3	13.6	15.99	13.6	7.8	21.8	19.3	11.2	9.7	11.5	17.1	9.5	8.1	18.2	13.9	8.6	7.9	12.7
79	1	65	175	105	XL	125	79	11.4	9.5	5.4	8.6	5.6	3.8	12.5	12.5	151	95	13.4	11.4	6.5	13	8.9	6.6	13.3	13.6	16.2	14.5	8	19	15.8	9.1	9.7	11.5	15.6	9.8	7.1	19.2	14.8	9.2	7.9	12.7
79	1	65	175	105	XL	125	79	11	9.5	5.2	9.1	5.6	3.9	12.5	12.5	151	95	13.5	11.4	6.5	13.3	9.9	6.7	13.3	13.6	16.2	13.9	8	18	15.2	8.5	9.7	11.5	14.8	11	6.6	18.8	13.9	8.9	7.9	12.7
79	1	65	175	105	XL	125	79	11.1	9.5	5.2	8.2	4.5	3.5	12.5	12.5	151	95	13.6	10.6	6.6	13.6	6.2	6.9	13.3	13.6	16.8	13.9	8.4	18.3	15.2	8.6	9.7	11.5	14.4	9.5	6.5	18.2	12.9	8.6	7.9	12.7
80	1	68	165	70	S	143	93	16.2	2.2	8	11.6	1.1	5.3	9.2	9.7	187	99	28.8	20.5	15.4	11.7	1.6	5.6	10.4	10.6	30.9	25.3	15.7	17.7	12.6	8.2	7.3	9.1	32.1	19.3	17.8	17.6	14.1	8.1	6.4	8.8
80	1	68	165	70	S	143	93	15.7	8.7	7.7	11.9	2.2	5.4	9.2	9.7	187	99	30	23	16.3	12.6	4.1	6	10.4	10.6	29.8	19.3	15.1	16	10.9	7.3	7.3	9.1	33.4	21.3	18.7	17.1	13.7	8	6.4	8.8
80	1	68	165	70	S	143	93	18	8.7	9	11.4	0	5.1	9.2	9.7	187	99	34.1	26.2	17.9	13.2	9.1	6.3	10.4	10.6	29.7	18.5	14.6	15.6	11.6	7	7.3	9.1	31.1	20.1	16.9	17.4	13.7	8.3	6.4	8.8
80	1	68	165	70	S	143	93	15.9	7.8	7.9	10.9	0.3	4.8	9.2	9.7	187	99	36.9	27.5	18.9	12.9	1	6.1	10.4	10.6	27.9	16.1	13.4	15.2	9.9	6.8	7.3	9.1	32	22.1	17.7	18.2	13.7	9	6.4	8.8
80	1	68	165	70	S	143	93	16.5	9.2	8.2	12.4	0	5.6	9.2	9.7	187	99	34.3	3.8	17.4	15	11.7	7	10.4	10.6	26.4	12.1	12.7	15.5	9.4	7	7.3	9.1	31.2	14.1	17.3	17.8	11.7	8.6	6.4	8.8
81	2	68	152	56	M	127	76	11.1	0	4.7	11.5	0	5	8.5	11.4	162	88	10.1	7.5	4.4	19	10.7	9.4	8.6	8.9	7.1	5.5	3.2	8.5	7.2	3.9	9.2	9.1	9.8	8	4	11	9.3	4.8	8	7.5
81	2	68	152	56	M	127	76	10.3	0	4.4	12.1	0.5	5.3	8.5	11.4	162	88	10.2	8.2	4.5	17.7	10.3	8.6	8.6	8.9	6.4	6.4	3.3	9.1	7.7	4.1	9.2	9.1	9.6	8.4	3.9	9.9	8.4	4.2	8	7.5
81	2	68	152	56	M	127	76	11.2	6.8	4.7	12.6	0	5.5	8.5	11.4	162	88	9.7	7.8	4.2	17.2	9.3	8.2	8.6	8.9	7.8	6.8	3.5	8.1	6.8	3.7	9.2	9.1	9.8	8.9	4	9.8	8.4	4.1	8	7.5
81	2	68	152	56	M	127	76	12	5.9	5.1	13.7	7.3	6.2	8.5	11.4	162	88	10	7.8	4.4	20.7	9.6	10.3	8.6	8.9	8	6.6	3.6	8.6	7	3.8	9.2	9.1	9.8	8	4	9.6	7.6	4.1	8	7.5
81	2	68	152	56	M	127	76	10.1	0	4.2	12.3	0	5.5	8.5	11.4	162	88	10.6	8.6	4.7	20.7	8.6	10	8.6	8.9	7.8	6.8	3.5	8.6	7	3.8	9.2	9.1	9.6	8.4	3.9	9.9	8.4	4.2	8	7.5
82	1	57	165	75	S	138	91	12.8	3.2	5.9	15.8	0	7.3	9.3	9.6	142	90	23	18.5	11.5	23.2	12.8	12.2	8.1	7.9	15.9	12.9	7.2	15.4	0	6.8	8.6	7.1	21.9	12.1	11.7	20	4	10.5	8.5	7.7
82	1	57	165	75	S	138	91	11	7.3	4.6	14.5	0	7	9.3	9.6	142	90	22.6	16.4	11.2	22.5	8.6	11.9	8.1	7.9	17.5	14.5	8.2	15.4	8	6.4	8.6	7.1	24.3	18.9	12.7	19.8	12.1	9.9	8.5	7.7
82	1	57	165	75	S	138	91	11.2	7.7	4.6	12.3	0	5.9	9.3	9.6	142	90	21.7	16.7	10.6	22	13.9	11.5	8.1	7.9	17.3	13.3	7.9	14.6	8	6.1	8.6	7.1	22.4	16.5	11.5	20.3	12.9	10.4	8.5	7.7
82	1	57	165	75	S	138	91	9.9	0	4.1	12.8	0	5.8	9.3	9.6	142	90	21.4	16.7	10.4	21.9	0	11.8	8.1	7.9	16.4	12.5	7	13.4	8	5.6	8.6	7.1	21.5	14.9	11.1	19.2	7.2	9.7	8.5	7.7
82	1	57	165	75	S	138	91	10.2	0	4.2	12.6	0	6	9.3	9.6	142	90	24.5	13.9	12	20.2	13.9	10.5	8.1	7.9	16.7	12.9	7.5	14	8.4	5.7	8.6	7.1	22.2	16.5	11.2	19.7	12.5	10.1	8.5	7.7
83	2	59	68	80	S	140	95	14.1	0	6.5	15.4	7.7	7.2	10.7	13.2	144	95	7.4	5.6	3.2	7.3	4.7	3.3	13.4	14.8	7.3	6.1	3.3	5.5	4.6	2.2	12.5	13.2	7.3	6.6	3.2	5.7	4.6	2.3	12.6	11.5
83	2	59	68	80	S	140	95	13.9	5.9	6.3	12.7	5	5.6	10.7	13.2	144	95	7	5.2	3.1	7	5.1	3	13.4	14.8	7.5	6.6	3.5	5.3	4.4	2.2	12.5	13.2	7.4	6.4	3.2	5.5	4.6	2.3	12.6	11.5
83	2	59	68	80	S	140	95	16.6	3.6	7.8	14.7	9.1	6.8	10.7	13.2	144	95	6.8	4.7	2.9	7.4	5.4	3.3	13.4	14.8	7.3	6.1	3.3	5.5	4.4	2.2	12.5	13.2	6.6	5.5	2.8	4.8	3.5	2	12.6	11.5
83	2	59	68	80	S	140	95	13.6	6.8	6.2	15.5	8.2	7.4	10.7	13.2	144	95	7.5	5.1	3.3	7	5.4	3.1	13.4	14.8	6.6	5.5	2.9	5.4	4.6	2.2	12.5	13.2	7.6	6.8	3.4	5.2	3.9	2.1	12.6	11.5
83	2	59	68	80	S	140	95	16.3	9.5	7.8	14.5	10	6.8	10.7	13.2	144	95	6.8	5.1	3	6.1	4.3	2.6	13.4	14.8	7.2	5.9	3.2	5.9	4.8	2.5	12.5	13.2	7.6	6.8	3.4	5.1	4.2	2.1	12.6	11.5
84	1	52	170	65	M	116	84	20.4	0.5	10	22.7	0	11.3	9.7	8.6	134	84	16.2	7.2	7.3	18.3	3.6	9.5	11.1	13	20.3	9.3	11	20.2	8	9.8	8.9	11	29.4	12.1	14.8	17.9	8.6	8.3	7.5	10.4
84	1	52	170	65	M	116	84	18.8	7.7	9.7	22.9	0	10.7	9.7	8.6	134	84	17.2	7.6	7.9	17.4	2.4	8.7	11.1	13	15.8	3.2	7.9	19.6	8.4	8.9	8.9	11	27.3	16.5	13.9	17.6	8.6	8	7.5	10.4
84	1	52	170	65	M	116	84	17.3	7.7	8.7	21	1.4	10	9.7	8.6	134	84	16.2	7.2	7.1	16	3.6	7.8	11.1	13	17.5	0	8.8	18.9	7.2	8.3	8.9	11	28.7	13.3	15.2	16.7	6.1	8.1	7.5	10.4
84	1	52	170	65	M	116	84	17.5	5.5	8.9	22.6	0	10.7	9.7	8.6	134	84	15.3	1.2	6.6	17.4	4	8.5	11.1	13	15.8	2	7.6	19.7	8	8.4	8.9	11	25.9	12.5	14.1	19.5	8.6	9.6	7.5	10.4
84	1	52	170	65	M	116	84	16.3	1.4	8.2	22.3	1.4	10.2	9.7	8.6	134	84	17.4	12.5	7.7	16.6	1.2	8	11.1	13	16	8.9	7.9	19.3	8.4	8.3	8.9	11	25.9	10.5	14.3	19.1	9.4	9.6	7.5	10.4
85	1	67	175	85	L	135	70	13.7	0	6.4	12.3	0	6.2	11.1	13.5	148	74	8.1	0	3.5	14.6	5	7.2	7.1	9.8	11.2	4.7	5.8	21	11.4	10.4	7.3	7.3	12.2	7.2	6.2	14.3	6.2	6.8	7.3	8.5
85	1	67	175	85	L	135	70	12.7	0	5.9	11.1	0	5.5	11.1	13.5	148	74	6.9	0	2.8	16.3	5.9	8.2	7.1	9.8	11.8	0	6.2	26.1	16.3	13.6	7.3	7.3	11.3	7.7	5.7	13	5.4	6	7.3	8.5
85	1	67	175	85	L	135	70	12.8	0	6	12.1	0	6	11.1	13.5	148	74	6.8	0	2.8	16.2	5.3	8.2	7.1	9.8	12.6	6.4	6.5	24.1	13.9	12.6	7.3	7.3	10.5	5.7	5.3	12.7	5.4	5.8	7.3	8.5
85	1	67	175	85	L	135	70	11.1	0	5	9.6	0	4.7	11.1	13.5	148	74	6.4	0	2.6	15.3	7.5	7.8	7.1	9.8	11.3	4.7	5.7	20.8	13.6	10.5	7.3	7.3	11.9	8.2	6.2	12.7	5.4	5.8	7.3	8.5
85	1	67	175	85	L	135	70	10.4	0	4.6	8.1	0	3.9	11.1	13.5	148	74	6.4	0	2.8	15	6.4	7.4	7.1	9.8	11.3	5.4	5.8	19.1	11.1	9.6	7.3	7.3	12	5.9	6.2	13	7.2	6.1	7.3	8.5
86	1	71	145	53	S	137	77	11.6	2.9	5.5	8.9	0	4.2	7.4	6.3	138	60	10.8	5.4	5.1	17.1	10.9	8.5	7.6	5.3	10.9	5.2	5.2	18.2	12.6	8.6	6.9	6.4	9.6	4.5	4.6	11.5	6.7	5.4	7.8	5.9
86	1	71	145	53	S	137	77	12.7	0	6	8.7	4.4	4.1	7.4	6.3	138	60	12.5	9.2	6	16.6	10.9	8	7.6	5.3	10.2	4.2	5	15.7	5.4	7.4	6.9	6.4	9.6	5.4	4.6	13.4	0.4	6.2	7.8	5.9
86	1	71	145	53	S	137	77	12.7	2.9	6.1	9	3.5	4.2	7.4	6.3	138	60	9.6	6.7	4.4	14.4	8.4	6.9	7.6	5.3	10.9	4	5.2	15	1.5	7.1	6.9	6.4	10.9	6.2	5.1	14.3	8.2	6.3	7.8	5.9
86	1	71	145	53	S	137	77	12.1	0	5.9	8.7	4.8	4.1	7.4	6.3	138	60	11.4	6.4	5.4	14.4	8.4	6.8	7.6	5.3	10.5	4.2	4.9	15.4	8.9	7.2	6.9	6.4	10.8	7.7	5	13.3	0	5.9	7.8	5.9
86	1	71	145	53	S	137	77	12.3	2.9	5.8	9	4.6	4.3	7.4	6.3	138	60	11.4	5.4	5.4	14.2	8.4	6.9	7.6	5.3	9.9	7.2	4.7	16.8	9.4	8	6.9	6.4	10.9	5.7	5	12.1	0	5.3	7.8	5.9
87	2	75	160	70	L	143	77	8.3	0	3.9	10.5	3.5	4.8	11.4	11.5	156	74	8.2	0	3.8	10.3	6.9	4.7	11.3	11	35.7	2.9	17.2	12.1	2.9	5.6	11.1	8.8	12.7	5.2	6.2	15.8	11.1	7.8	12.5	8.7
87	2	75	160	70	L	143	77	11.1	1.2	4.9	10.5	4.7	4.7	11.4	11.5	156	74	10.1	0.9	4.7	10.6	0	4.9	11.3	11	29.4	12.2	14.5	11.9	2.1	5.4	11.1	8.8	12.7	0.7	5.9	13.4	6.7	6.6	12.5	8.7
87	2	75	160	70	L	143	77	9.9	3.7	4.3	10.3	0	4.7	11.4	11.5	156	74	11.5	5.7	5.4	10	0.9	4.5	11.3	11	24.1	1.2	11.7	11.3	1.4	5.2	11.1	8.8	12.2	5	5.7	13.4	8.4	6.6	12.5	8.7
87	2	75	160	70	L	143	77	9.5	0	4	11.7	6.9	5.6	11.4	11.5	156	74	10.5	5.7	4.9	10.6	6	4.8	11.3	11	26.7	9.3	12.9	12	1	5.5	11.1	8.8	11.5	2.5	5.3	12.9	8.4	6.3	12.5	8.7
87	2	75	160	70	L	143	77	8.7	0	3.8	12.6	5.4	6.1	11.4	11.5	156	74	10.7	6.3	5	11.3	6.9	5.1	11.3	11	19.3	0	9.6	12.8	2.1	6	11.1	8.8	12	4.5	5.6	11.7	7.7	5.7	12.5	8.7
88	2	67	156	68	M	112	61	11.9	3.2	5.6	19.8	8.4	10.1	11	9.5	138	71	25.6	20.5	14	25.4	18.5	13.3	8.5	7.4	24.7	20	12.9	21.4	18.5	11.1	9.5	7.5	23.2	16.4	12.4	21.3	15.7	10.6	8.6	8.5
88	2	67	156	68	M	112	61	12.7	4	5.9	18.4	3.5	9.2	11	9.5	138	71	27.3	22.9	14.9	24.9	15.3	12.9	8.5	7.4	24.5	21.4	12.8	20	15.7	9.9	9.5	7.5	24.6	21	13	20.5	16	10.1	8.6	8.5
88	2	67	156	68	M	112	61	13.3	5.9	6.2	21.3	7.7	10.7	11	9.5	138	71	28	23.7	15.4	23.1	15.3	11.7	8.5	7.4	25.1	18.9	12.9	17.9	15	8.5	9.5	7.5	23.6	19.6	12.5	19.2	14.6	9.4	8.6	8.5
88	2	67	156	68	M	112	61	13.2	5.7	6.3	19.4	4.2	9.8	11	9.5	138	71	26.8	20.9	14.8	20.3	14.1	9.4	8.5	7.4	24	19.6	12.5	19	16	9.4	9.5	7.5	23.7	19.6	12.5	19.2	15.3	9.4	8.6	8.5
88	2	67	156	68	M	112	61	12.6	0	6	15.9	2.7	8	11	9.5	138	71	26.1	20.1	14.2	20.3	8.9	9.3	8.5	7.4	24.1	19.2	12.4	18.1	15	8.8	9.5	7.5	22.6	13.2	11.9	19.1	12.1	9.4	8.6	8.5
89	1	70	151	60	L	111	68	12.5	7.7	6.1	19.2	11.9	8.5	9.8	10	131	69	16.7	13.2	7.4	30.3	22.7	15.2	9.7	7.8	13.9	10.3	6.4	24.8	20.3	11.7	9.6	6.1	15.2	9.6	6.7	28.5	22.8	14.7	8.8	5.6
89	1	70	151	60	L	111	68	13.2	10.4	6.6	16.9	14.1	7.8	9.8	10	131	69	16.7	12.3	7.7	27.6	20	13.9	9.7	7.8	14	10	6.4	24.3	20.7	12	9.6	6.1	15.9	12.8	7.1	33.5	29.2	16.7	8.8	5.6
89	1	70	151	60	L	111	68	13.2	8.2	6.5	15.4	7.9	7.2	9.8	10	131	69	17.2	14.1	7.9	30.8	23.2	15.8	9.7	7.8	14.1	11	6.4	26.2	22.1	12.7	9.6	6.1	15.3	11	6.7	32.3	27.8	14.8	8.8	5.6
89	1	70	151	60	L	111	68	11.6	5.7	5.6	13.8	4.7	6.4	9.8	10	131	69	16.7	12.7	7.5	29.4	22.7	15.2	9.7	7.8	14.1	12.1	6.4	27.8	23.9	13.2	9.6	6.1	15.3	12.1	6.8	31.7	26.4	14.6	8.8	5.6
89	1	70	151	60	L	111	68	11.7	8.2	5.7	15	9.2	7	9.8	10	131	69	16.4	10.9	7.3	32.6	24.5	16.7	9.7	7.8	14.2	11.8	6.4	27.1	23.2	13	9.6	6.1	15.5	13.2	6.9	29	25.3	13.5	8.8	5.6
90	1	65	161	75	L	142	86	13.8	0	6.7	12.5	0	5.8	10.8	11.3	145	78	16.8	13.9	7.9	10.5	7.5	4.4	11	11.8	16.3	12.1	7.9	8.9	5.4	3.9	11.5	11.2	18.4	14	9.3	11	5.8	5	11.6	11.2
90	1	65	161	75	L	142	86	15.1	0	7.3	9.5	0	4.4	10.8	11.3	145	78	17.1	11.4	8	10.7	6.1	4.6	11	11.8	14.9	12.4	7.3	8.1	5.2	3.5	11.5	11.2	18.5	15.9	9.2	14.1	9.2	6.3	11.6	11.2
90	1	65	161	75	L	142	86	15.6	2	7.7	9.8	0	4.5	10.8	11.3	145	78	16.2	13.2	7.3	10.2	7.1	4.3	11	11.8	15.4	12.1	7.7	9.3	5.9	4.2	11.5	11.2	18.7	15.4	9.2	13.4	6.1	5.9	11.6	11.2
90	1	65	161	75	L	142	86	16.3	6.7	7.9	9	2	4.1	10.8	11.3	145	78	16.4	13.5	7.5	10.2	6.1	4.3	11	11.8	15.9	13.1	8.1	9.3	4	5.9	11.5	11.2	17.7	15.1	8.4	13.2	10.3	5.9	11.6	11.2
90	1	65	161	75	L	142	86	15.3	2.5	7.4	9.7	0	4.5	10.8	11.3	145	78	16.6	12.5	7.6	11.5	7.8	5	11	11.8	16.5	13.6	8.5	8.8	6.7	3.9	11.5	11.2	17.6	13.7	8.3	13.1	9.2	5.8	11.6	11.2
91	1	60	159	59	S	161	93	10.2	1.9	4.8	6	2.4	2.5	10.3	9.7	165	106	10.3	4.6	4.3	11.6	7.8	5	9.7	9.6	11.4	7.8	5.3	10.2	6.1	4.6	8.9	9.5	12.3	4.2	5.7	13.8	9.2	6	7.8	7.8
91	1	60	159	59	S	161	93	8.5	1.7	3.9	6.4	0.2	2.7	10.3	9.7	165	106	12	5	5.2	11.1	6.4	4.8	9.7	9.6	9.3	5.6	4	10.2	7.8	4.6	8.9	9.5	14.4	10.1	6.8	14	8.4	6.1	7.8	7.8
91	1	60	159	59	S	161	93	8.9	2.9	4.2	6.3	2.1	2.7	10.3	9.7	165	106	11.8	0.7	5.1	10.7	6.4	4.6	9.7	9.6	9.2	4.2	3.9	10.5	7.3	4.8	8.9	9.5	14.2	8.4	6.8	13.5	8.4	5.8	7.8	7.8
91	1	60	159	59	S	161	93	10	4.5	4.7	6.6	2.9	2.8	10.3	9.7	165	106	12.5	6.8	5.5	12.2	7.5	5.4	9.7	9.6	9.6	0	4.2	10.9	7	4.9	8.9	9.5	14.7	9.5	7.1	13	8.7	5.5	7.8	7.8
91	1	60	159	59	S	161	93	10.5	5.5	5	8.5	3.8	3.9	10.3	9.7	165	106	13.4	7.8	6	10.9	8.2	4.6	9.7	9.6	9.5	5.9	4.1	11.3	7.8	5.2	8.9	9.5	14.6	2.5	7	12.8	7.3	5.4	7.8	7.8
92	2	70	153	60	S	126	74	7	0	3.1	6.9	0	2.9	12.9	13.8	157	87	12.4	8.9	5.9	12.8	7.3	5.9	12.3	14.1	9.4	4.2	4.3	10.6	3.7	4.9	12.3	10.2	10.1	0.4	4.4	13.9	6.4	6.2	11.4	10
92	2	70	153	60	S	126	74	7.7	0	3.3	7.8	0	3.3	12.9	13.8	157	87	12.3	8.9	5.5	13	8.1	6	12.3	14.1	9.7	5	4.4	10.5	5.3	4.8	12.3	10.2	10	2.1	4.3	12.3	5.7	5.4	11.4	10
92	2	70	153	60	S	126	74	7.6	0	3.3	7.8	4.8	3.4	12.9	13.8	157	87	11.5	7.8	4.9	13.4	8.4	6.2	12.3	14.1	9	4.4	4.1	10.2	5.9	4.6	12.3	10.2	9.7	2.9	4.1	12.2	6.1	5.4	11.4	10
92	2	70	153	60	S	126	74	7	0	3	7.7	0	3.3	12.9	13.8	157	87	10.6	8.1	4.8	13.8	8.7	6.4	12.3	14.1	9.5	4.4	4.1	9.9	5.9	4.4	12.3	10.2	10	0	4.3	13.2	6.8	5.8	11.4	10
92	2	70	153	60	S	126	74	6.5	0	2.7	7.7	0.6	3.3	12.9	13.8	157	87	10.6	8.7	4.8	13.5	8.7	6.3	12.3	14.1	9.3	4.2	4.1	9.8	5.3	4.3	12.3	10.2	9.9	0	4.2	13	5.3	5.8	11.4	10
93	2	72	157	61.5	S	119	74	11.1	0	4.8	11.7	0	5.2	10	11.9	141	83	18.8	14.1	8.3	17.3	11.7	7.7	10.2	11.4	12.2	9.2	5.6	14.4	10.9	6.3	11	9.7	14.1	5.6	6.5	14.3	6.4	6.7	10.1	10
93	2	72	157	61.5	S	119	74	10.7	0	4.5	12.3	2.9	5.3	10	11.9	141	83	18.8	13.7	8.2	17.3	11.3	7.9	10.2	11.4	13.1	10.3	6.1	14.5	11.2	6.3	11	9.7	14.6	9.5	6.9	14.4	9.5	6.7	10.1	10
93	2	72	157	61.5	S	119	74	10.8	6.8	4.6	12	1.8	5.1	10	11.9	141	83	18.8	11.3	8.4	17.5	12.1	7.9	10.2	11.4	13.3	10.9	6.2	14.9	9.8	6.4	11	9.7	14.4	6.7	6.5	15.5	10.6	7.4	10.1	10
93	2	72	157	61.5	S	119	74	10.3	0	4.4	11	0	4.7	10	11.9	141	83	19.7	14.1	8.9	16.9	12.5	7.6	10.2	11.4	13.2	10.1	6.1	14	10.1	6	11	9.7	14.7	6.1	6.9	15.6	10.1	7.5	10.1	10
93	2	72	157	61.5	S	119	74	11	6.1	4.5	12.8	0.4	5.4	10	11.9	141	83	19.3	9.7	8.7	16.5	12.5	7.4	10.2	11.4	12.3	7.5	5.5	14.5	10.6	6.2	11	9.7	15.1	8.7	7.2	15.7	9.5	7.7	10.1	10
94	1	67	168	90	S	135	79	9.5	3.6	4.6	10	0	4.7	11.4	11.5	138	86	10.7	0	5	15.4	11.4	8	10.4	12.3	11.9	6.9	5.2	11.5	6	5.5	8.2	13.8	12.4	7.9	5.8	15.1	11.7	7.7	8.4	10.4
94	1	67	168	90	S	135	79	8	0	3.8	9	0	4.3	11.4	11.5	138	86	9.5	0	4.3	15.6	11.4	8.1	10.4	12.3	11.4	6.3	5	12.7	8.2	6.3	8.2	13.8	12.6	7.6	5.8	16	11.7	8.1	8.4	10.4
94	1	67	168	90	S	135	79	9.5	0	4.6	8.3	0	3.9	11.4	11.5	138	86	8.4	0	3.7	14	11	6.8	10.4	12.3	11.5	5.1	5.2	12.2	8.5	5.9	8.2	13.8	12.6	6.9	5.9	15.7	11.7	8.1	8.4	10.4
94	1	67	168	90	S	135	79	9	1.7	4.2	8.4	0	3.9	11.4	11.5	138	86	10.1	0	4.5	14.4	10.7	7	10.4	12.3	11.3	5.4	5.1	12	5.4	5.8	8.2	13.8	13.3	8.2	6.1	14.7	7.9	7.2	8.4	10.4
94	1	67	168	90	S	135	79	9.2	0	4.4	7.8	0	3.6	11.4	11.5	138	86	9.7	0	4.3	13.7	9.6	6.8	10.4	12.3	10.3	1.6	4.6	12.6	8.8	6.2	8.2	13.8	12.1	8.5	5.5	14.8	9.5	7.4	8.4	10.4
95	1	63	172	85	M	121	72	15.2	8.7	7.1	14.6	7.8	6.4	11.5	11.5	130	82	15.9	11.4	7.7	12.7	2.2	5.8	10.5	10.3	14.2	10.7	6.6	19.5	10.4	9.4	11.1	8	16	12.3	7.6	12	5.7	6.3	10	8.9
95	1	63	172	85	M	121	72	15.9	10.3	7	15.3	5.6	7.2	11.5	11.5	130	82	15.3	10.7	7.3	12.9	0	5.8	10.5	10.3	14.5	10.4	6.7	17.2	12.3	7.9	11.1	8	17.1	13.6	8.2	10.6	0	4.9	10	8.9
95	1	63	172	85	M	121	72	16	10.9	7.1	16	9.2	7.6	11.5	11.5	130	82	16	10.1	8	10.8	0.9	4.7	10.5	10.3	15.3	11.4	7.2	15.8	9.5	7.1	11.1	8	16.9	13.3	7.9	11.8	2.8	5.5	10	8.9
95	1	63	172	85	M	121	72	15.8	10.3	7.2	15.9	8.1	7.6	11.5	11.5	130	82	14.6	7.6	6.6	11.8	0.9	5.2	10.5	10.3	14.7	10.1	6.6	15.4	8.8	6.8	11.1	8	16.7	9.8	7.8	14.2	7.6	7.2	10	8.9
95	1	63	172	85	M	121	72	15.1	10.1	7	17.5	8.4	8.3	11.5	11.5	130	82	14.1	8.2	6.3	9.7	0	4.3	10.5	10.3	14.2	10.4	6.7	18.3	9.8	8.4	11.1	8	16.9	12.6	7.9	12.3	5.4	6	10	8.9
96	2	76	160	57	M	136	76	9.9	0.3	4.3	10.4	0	4.5	9.8	10.1	153	75	39.9	28.2	20.1	29.3	21.7	14.8	8.8	8.1	16	10	7.4	19.8	12.5	9.4	8.9	7.8	14.6	8.9	6.5	21.9	15.7	10.3	7.2	7.3
96	2	76	160	57	M	136	76	9.1	0	4	10.6	0	4.7	9.8	10.1	153	75	30.2	21.3	15.1	26	16.9	12.8	8.8	8.1	14.7	10	6.9	19	10.3	9	8.9	7.8	15.7	7.6	6.9	21.7	13.7	10.1	7.2	7.3
96	2	76	160	57	M	136	76	9.3	0	4.1	9.5	0	4.2	9.8	10.1	153	75	34.8	23.3	17.4	28	21.3	13.7	8.8	8.1	14.6	9.3	6.8	20.9	9.6	10	8.9	7.8	16.8	10.1	7.5	21.3	11.3	9.8	7.2	7.3
96	2	76	160	57	M	136	76	8.4	0	3.7	11.2	0	5.1	9.8	10.1	153	75	33.3	24.1	16.2	28.4	21.7	13.9	8.8	8.1	15.5	8.9	7.2	22.5	12.8	10.8	8.9	7.8	19.8	10.9	8.9	21.7	11.7	10	7.2	7.3
96	2	76	160	57	M	136	76	8.4	2.8	3.6	8.7	3.8	3.8	9.8	10.1	153	75	32.1	22.9	15.5	26.9	20.5	13.1	8.8	8.1	15.6	10.7	7.3	23.7	18.2	11.3	8.9	7.8	19.1	12.9	8.6	21	11.3	9.5	7.2	7.3
97	1	72	151	64	M	139	91	15.5	10.4	7.4	15.2	9.2	7.4	8.9	8.7	152	74	16.7	8.9	7.9	17.8	14.1	8.6	9.5	9.3	14.3	7.8	6	21.1	17.5	10.9	8.6	8.1	33	21.6	17.8	39.1	28.5	20.7	8.1	6.7
97	1	72	151	64	M	139	91	16.9	12.6	8	15.8	9.5	7.7	8.9	8.7	152	74	17.1	9.4	8.1	16.6	14.1	8	9.5	9.3	13.2	7.1	5.6	20	5.3	10.3	8.6	8.1	32.5	21.6	17.3	34.5	26.8	18	8.1	6.7
97	1	72	151	64	M	139	91	15.4	7.9	7	16.7	11	8.2	8.9	8.7	152	74	16.7	9.2	7.9	13	10.6	6.2	9.5	9.3	13	6.8	5.5	19.7	16.4	9.7	8.6	8.1	29.5	19	15.4	34.3	26.8	18	8.1	6.7
97	1	72	151	64	M	139	91	14.7	10.4	6.6	15.7	4.1	7.5	8.9	8.7	152	74	15.6	7.9	7.3	15.5	13.6	7.6	9.5	9.3	13.2	6.4	5.5	19.9	16.4	9.9	8.6	8.1	28.2	15	14.8	34.9	26.2	18.3	8.1	6.7
97	1	72	151	64	M	139	91	14.7	11	6.7	15.5	11.7	7.3	8.9	8.7	152	74	15.8	7.9	7.5	15.1	13.1	7.4	9.5	9.3	13	7.5	5.5	19.7	16	9.7	8.6	8.1	26.7	16.3	14.2	38.2	30.7	19.9	8.1	6.7
98	2	70	158	49	S	123	64	10.5	8.2	4.7	12.5	0	5.6	8.1	8	142	59	12.4	7.1	5.5	11.8	8.2	5.5	7.7	8.3	12.2	9.6	5.4	12.3	11	5.4	6.6	8	11.6	9.3	5	17.7	14.1	8	6.8	8
98	2	70	158	49	S	123	64	10.1	8.2	4.4	11.2	5.7	5.1	8.1	8	142	59	14.4	8.9	6.5	11.3	8.2	5.2	7.7	8.3	11.6	8.6	5	12.6	11	5.7	6.6	8	11.4	8.4	5	17.6	12.9	8	6.8	8
98	2	70	158	49	S	123	64	10	8.2	4.4	10.6	3.8	4.8	8.1	8	142	59	13.9	8.6	6.2	11.6	8.6	5.4	7.7	8.3	11.4	9.3	4.9	13.7	11	6.1	6.6	8	12.3	9.7	5.4	16.8	13.3	7.5	6.8	8
98	2	70	158	49	S	123	64	14.7	8.5	6.9	11	0	5	8.1	8	142	59	13.9	7.8	6.2	11.3	8.6	5.3	7.7	8.3	11.5	8.6	5	11.8	9.3	5.3	6.6	8	12.8	10.5	5.8	18.8	12.5	7.1	6.8	8
98	2	70	158	49	S	123	64	11.8	6.3	5.3	11.7	0	5.5	8.1	8	142	59	15.6	8.9	7.2	11.3	8.2	5.3	7.7	8.3	11.4	7.8	5	12.2	10	5.5	6.6	8	12.6	9.3	5.7	15.2	11.3	6.8	6.8	8
99	2	67	154	65	M	141	83	10.6	0	5.1	13.7	6.3	6.6	11.9	10.8	177	101	20.7	6	10.8	15.9	8.4	7.3	10.9	9.5	19	0	9.4	10.4	6.4	4.5	7.9	10.5	13.3	4.8	6.3	11.2	5.3	5.1	8.5	9.5
99	2	67	154	65	M	141	83	10	0	4.7	13	7.9	6.1	11.9	10.8	177	101	19.9	6.4	10.3	16.7	9.3	7.6	10.9	9.5	16.5	0.3	8	11.1	5.3	5	7.9	10.5	11.3	0	5.2	11.2	7.3	5.4	8.5	9.5
99	2	67	154	65	M	141	83	10.3	0	5	13.3	6.6	6.2	11.9	10.8	177	101	19.7	0	10.3	15.8	9.3	7.3	10.9	9.5	15.3	0	7.5	10.6	5.9	4.6	7.9	10.5	10.8	0	5	11.2	6.4	5.2	8.5	9.5
99	2	67	154	65	M	141	83	9.1	0	4.3	12.6	6.6	5.9	11.9	10.8	177	101	18	0	9.3	16.8	10.1	7.6	10.9	9.5	15.8	5.9	8	11.8	7	5.4	7.9	10.5	10.8	0.6	5	10.8	6.1	4.9	8.5	9.5
99	2	67	154	65	M	141	83	10.4	0	4.9	12.7	5.7	5.9	11.9	10.8	177	101	19	0	9.9	14.4	7.2	6.3	10.9	9.5	16.5	4.5	8.3	11.6	6.7	5.3	7.9	10.5	10.7	0	5	11.8	7.3	5.5	8.5	9.5
100	2	59	172	80	M	131	84	7.4	0	3.2	7.7	0.5	3.3	13.8	14.2	125	87	8.4	0	3.7	9	0.9	3.7	14.4	13.5	13.6	0	6.1	14.3	3.2	6.6	12.3	12.7	19.5	10.1	8.8	13.9	0.8	6.2	10.1	12
100	2	59	172	80	M	131	84	7.6	0	3.3	7.7	4.2	3.3	13.8	14.2	125	87	8	0	3.3	9.2	5.4	3.8	14.4	13.5	15	8.9	7	14.3	1.6	6.5	12.3	12.7	19.9	13.7	9	14.4	6	6.1	10.1	12
100	2	59	172	80	M	131	84	8.2	2.5	3.6	7.6	0.2	3.3	13.8	14.2	125	87	8.2	0	3.5	9	2.8	3.8	14.4	13.5	14.5	8.4	6.9	14.9	0	6.8	12.3	12.7	19.4	11.7	9	15.1	8	6.4	10.1	12
100	2	59	172	80	M	131	84	7.4	0.2	3.2	8.6	5.7	3.8	13.8	14.2	125	87	7.8	0	3.2	9.4	1.3	4	14.4	13.5	14.7	6.8	7	14.8	0.4	6.7	12.3	12.7	19.1	11.3	8.6	13.4	1.2	5.6	10.1	12
100	2	59	172	80	M	131	84	7	0	3	7.8	0	3.3	13.8	14.2	125	87	6.5	0	2.7	9.3	4.4	3.9	14.4	13.5	14.1	10.9	6.6	15.9	6.4	7.3	12.3	12.7	20.2	11.7	9.2	14	6.4	5.9	10.1	12
101	1	80	156	60	S	147	74	14.8	12.5	7.1	24.8	17.7	12.6	8.1	7.2	160	79	18.7	12.9	10	21.6	12.5	11.5	8	6.7	15.7	11.4	7.6	26	17.8	13.3	9.9	7.5	14.1	9.6	6.7	17.8	15	8.3	9.3	9.4
101	1	80	156	60	S	147	74	16.1	12.9	7.8	24.5	18.5	12.4	8.1	7.2	160	79	18.3	11.7	8.9	24	9.3	12.3	8	6.7	15.5	11	7.7	25.7	17.5	13.2	9.9	7.5	13.4	8.9	6.4	20	16.7	9.6	9.3	9.4
101	1	80	156	60	S	147	74	15.9	13.3	7.7	22.3	15.3	11.2	8.1	7.2	160	79	19.4	13.3	9.2	18.9	8.4	9.1	8	6.7	16.2	10.7	8	28.5	20	14.6	9.9	7.5	13.5	10.7	6.4	22.4	18.9	10.9	9.3	9.4
101	1	80	156	60	S	147	74	15.6	11.7	7.4	25.1	18.5	13	8.1	7.2	160	79	18.3	12.9	8.7	19.2	0	9.2	8	6.7	15.7	11.4	7.7	26.7	19.6	14	9.9	7.5	14.2	10.3	6.7	21.1	18.2	10.3	9.3	9.4
101	1	80	156	60	S	147	74	15.7	12.5	7.5	23.6	17.7	12.3	8.1	7.2	160	79	15.9	6.4	7.3	22.9	13.3	12.6	8	6.7	15.6	11	7.8	25.8	14.6	13.3	9.9	7.5	13.5	8.2	6.4	18.9	16	9	9.3	9.4
102	2	58	165	64	M	140	75	11.5	6.8	5.2	12.7	8	5.7	10.8	10.4	158	88	11.8	7.8	5.5	21	13.2	10.5	10.7	9.9	13.7	10	6.9	14.4	10.3	8.8	9.4	8.8	11.6	9.3	5.7	13.1	8.6	5.9	11.7	9.8
102	2	58	165	64	M	140	75	12.2	6.8	5.5	11.9	7.6	5.3	10.8	10.4	158	88	11.5	8.2	5.3	18.9	13.2	9.2	10.7	9.9	12	7.1	5.8	14.5	10.3	6.8	9.4	8.8	11.5	8.6	5.6	13.3	9.6	6.1	11.7	9.8
102	2	58	165	64	M	140	75	12.9	7.2	5.9	12	7.6	5.3	10.8	10.4	158	88	10.9	8.9	5	18.8	13.5	8.9	10.7	9.9	11.4	7.5	5.5	14.1	10	6.6	9.4	8.8	11.5	8.2	5.5	12.9	8.6	6	11.7	9.8
102	2	58	165	64	M	140	75	12.9	7.6	6	11.5	7.2	5.1	10.8	10.4	158	88	10.4	8.6	4.7	17.4	12.5	8.2	10.7	9.9	13.1	8.6	6.3	13.4	9.6	6.2	9.4	8.8	10.6	6.8	5	12.5	8.9	5.8	11.7	9.8
102	2	58	165	64	M	140	75	12.4	8.4	5.8	11.8	7.6	5.3	10.8	10.4	158	88	10.9	8.2	4.8	17.3	11.4	8.2	10.7	9.9	13.1	10	6.4	14.3	9.3	6.7	9.4	8.8	11.1	8.2	5.2	12.1	8.9	5.5	11.7	9.8
103	1	67	165	62	S	117	70	18.2	12.9	8.9	18.1	12.1	8.6	9	9.2	142	70	23.9	20.1	12.8	24.1	13.3	11.4	8.6	8.9	16.6	13.2	8.5	23.2	15	11	7.5	8.4	17.1	12.5	8.3	29.8	22.5	16.3	8.3	7.4
103	1	67	165	62	S	117	70	17.1	10.5	8.2	17.8	11.3	8.4	9	9.2	142	70	24.4	20.9	13	23.6	13.3	11.3	8.6	8.9	16.5	12.5	8.6	24	16	11.3	7.5	8.4	16.4	12.8	7.9	28.6	20.7	15	8.3	7.4
103	1	67	165	62	S	117	70	16.3	13.3	7.9	16.6	11.3	7.8	9	9.2	142	70	21.6	20.5	13	23	12.1	11	8.6	8.9	15.7	13.2	7.9	23.7	18.2	10.8	7.5	8.4	16.4	11.4	8	27.9	21.4	14.7	8.3	7.4
103	1	67	165	62	S	117	70	16.6	10.1	8	16.6	10.1	7.7	9	9.2	142	70	24.1	20.5	12.7	22.6	13.7	10.8	8.6	8.9	16.1	12.5	8	23.2	17.5	10.5	7.5	8.4	16.8	12.8	8.2	30.3	13.9	15.9	8.3	7.4
103	1	67	165	62	S	117	70	17	9.3	8.3	16.6	10.5	7.7	9	9.2	142	70	24.1	20.5	12.8	22.4	12.9	10.7	8.6	8.9	15.3	11.8	7.4	20.4	15.3	9.1	7.5	8.4	16.2	11.8	7.8	38.9	28.9	21.5	8.3	7.4
104	1	65	165	85	L	154	99	9.4	4.3	4.6	9.9	3.5	4.7	7.9	8.5	161	89	18.2	10.5	9.6	14.4	9.3	6.7	10.3	11.5	8.3	7.3	3.7	9.8	8.7	4.6	8.3	10.4	7.8	6.1	3.5	10.6	8.9	5.4	8	10.5
104	1	65	165	85	L	154	99	8.7	3.1	4.1	8.5	3.3	3.9	7.9	8.5	161	89	15.9	6.4	8.1	15.1	11.7	7.1	10.3	11.5	7.8	5.9	3.5	9.4	7.8	4.4	8.3	10.4	7.4	5.9	3.4	10.6	8.1	5.1	8	10.5
104	1	65	165	85	L	154	99	10.5	4.4	4.9	7.8	2.8	3.4	7.9	8.5	161	89	16.8	12.5	8.5	14.8	9.3	6.8	10.3	11.5	8.1	6.7	3.7	9.4	7.8	4.4	8.3	10.4	7.4	5.6	3.4	10.9	8.7	5.3	8	10.5
104	1	65	165	85	L	154	99	11	5.5	5	8.8	2.7	4.2	7.9	8.5	161	89	16.4	10.5	8.5	15.9	11.3	7.4	10.3	11.5	8	5.9	3.6	9.7	8.4	4.5	8.3	10.4	7.3	6.1	3.3	10.9	5.6	5.3	8	10.5
104	1	65	165	85	L	154	99	11.5	6.1	5.3	8.9	3.5	4.1	7.9	8.5	161	89	17.2	12.9	9.1	18.3	12.9	9	10.3	11.5	8	6.4	3.6	10	8.9	4.7	8.3	10.4	6.9	5.3	3.1	10.7	8.9	5.3	8	10.5
105	2	69	162	64	M	123	80	14	6.6	6.1	11.2	4.6	5.1	8.9	8.8	150	89	13.9	9.2	6.7	11.8	8.4	5.4	10.1	8.7	15.5	2.5	7.3	11.6	5.9	5.1	6.2	8.4	11.4	3.1	5.4	16.6	4.8	8	7.8	7.7
105	2	69	162	64	M	123	80	14.6	9.2	6.6	12.3	7.7	5.8	8.9	8.8	150	89	14.9	11.7	7.2	12.3	8.9	5.6	10.1	8.7	14.8	2.5	6.9	10.4	3.6	4.5	6.2	8.4	13.3	7.3	6.6	17.1	3.4	8.1	7.8	7.7
105	2	69	162	64	M	123	80	13.1	6.6	5.8	12.4	8.3	5.8	8.9	8.8	150	89	14	8.4	6.6	12.7	9.2	5.9	10.1	8.7	13.3	1.4	6.1	9.7	3.4	4.2	6.2	8.4	13.5	9.2	6.7	16.6	12.9	7.8	7.8	7.7
105	2	69	162	64	M	123	80	14.9	11.4	6.7	13.2	10.3	6.2	8.9	8.8	150	89	13.8	6.7	6.7	13.1	9.8	6.1	10.1	8.7	14	1.7	6.5	11.4	6.7	5	6.2	8.4	12.3	4.8	6	13.8	5.6	6.3	7.8	7.7
105	2	69	162	64	M	123	80	11.8	3.7	5.1	14.2	10.5	6.7	8.9	8.8	150	89	13.2	6.7	6	12.5	9.2	5.6	10.1	8.7	15.1	2.8	6.8	10.2	1.1	4.4	6.2	8.4	11.7	3.9	5.7	14.5	10.3	6.7	7.8	7.7
106	1	70	154	61	M	116	73	19.7	5.6	10.1	14.6	7.5	7	8.9	12.3	98	72	18.8	5	9.3	10	7.3	4.4	10	10.8	12	7.7	5.3	15	10	7	9.3	12.9	11.6	7.7	5.2	15.2	9.5	7.1	9.7	13.3
106	1	70	154	61	M	116	73	18.5	5.6	9.3	14.3	7.5	6.9	8.9	12.3	98	72	12.2	6.7	5.8	9.2	7	4.1	10	10.8	11.9	7.7	5.2	14.9	10.4	7	9.3	12.9	1.6	7.3	5.2	13.7	9.5	6.2	9.7	13.3
106	1	70	154	61	M	116	73	20.2	7	10.2	13.3	4.5	6.4	8.9	12.3	98	72	14.9	9.8	7.2	9.4	6.4	4.2	10	10.8	11.7	7.3	5.1	14.5	8.6	6.7	9.3	12.9	11.9	6.8	5.3	13.1	8.6	5.9	9.7	13.3
106	1	70	154	61	M	116	73	20.7	9.5	10.5	14.2	7	6.8	8.9	12.3	98	72	13.7	6.4	6.8	9.7	7	4.3	10	10.8	11.4	7.7	5	14.2	8.6	6.6	9.3	12.9	12.1	5.9	5.3	13.2	9.5	5.9	9.7	13.3
106	1	70	154	61	M	116	73	21.1	10.9	10.8	13.4	6.1	6.4	8.9	12.3	98	72	10.4	4.8	4.9	7	4.2	3	10	10.8	10.9	7.7	4.7	12.4	7.3	5.6	9.3	12.9	11.8	8.2	5.2	13.5	10.4	6.2	9.7	13.3
107	1	79	141	63	S	154	71	15.3	13.1	7.2	17.1	14	8.3	9.9	9.5	174	102	12.3	0	5.6	10.7	0	4.4	7.9	8.9	12.5	0	7	10.6	3.2	4.3	7.4	6.4	10.2	0	4.3	9.3	0	3.8	7.6	6.3
107	1	79	141	63	S	154	71	15.2	13.1	7.2	16.7	14.5	8.1	9.9	9.5	174	102	12.8	3.6	5.8	12.7	0	5.1	7.9	8.9	16.9	0	8	9.4	0	3.9	7.4	6.4	9.1	0	3.8	10.5	0	4.3	7.6	6.3
107	1	79	141	63	S	154	71	15.3	13.4	7.3	17.3	15.7	8.5	9.9	9.5	174	102	12.4	6.4	5.7	9.7	0	4	7.9	8.9	22.6	10.9	10.6	10.5	0	4.5	7.4	6.4	9.9	0	4.2	9.8	0	3.9	7.6	6.3
107	1	79	141	63	S	154	71	15	12.6	7	18.2	15.9	8.9	9.9	9.5	174	102	12	0	5.4	10	0	4.2	7.9	8.9	17.3	2.3	8.1	11.5	6.8	5	7.4	6.4	9.9	0	4.3	9.5	0	3.8	7.6	6.3
107	1	79	141	63	S	154	71	14	12.3	6.4	17.8	14.8	8.6	9.9	9.5	174	102	11.8	3.2	5.2	9.5	0	3.9	7.9	8.9	15	0	6.9	11	12.9	4.8	7.4	6.4	9.8	0	4.3	7.3	0	3	7.6	6.3
108	2	76	160	65	M	125	77	15.8	8.2	7.5	14.8	9.5	6.8	10.3	10.7	144	83	12.9	11.4	5.8	14.1	11.7	7	10.4	8.5	16.3	13.1	8.3	15.8	12.6	7.8	10.8	9.7	16.3	10.2	7.8	21	14.4	9.8	11	9.2
108	2	76	160	65	M	125	77	16.7	6.8	7.9	13.6	6.4	6.3	10.3	10.7	144	83	11.9	10.4	5.3	12.9	0	6.4	10.4	8.5	16.2	12.9	8.3	16.5	12.9	8.1	10.8	9.7	15.5	9.4	7.5	21.3	14.6	10.2	11	9.2
108	2	76	160	65	M	125	77	17	4.1	8.1	14.7	2.3	6.9	10.3	10.7	144	83	10.9	9.2	4.9	13.5	9.2	6.6	10.4	8.5	15.6	12.6	8	10.7	11.1	7.2	10.8	9.7	14	8.9	6.6	22.5	16.6	11	11	9.2
108	2	76	160	65	M	125	77	16.1	8.2	7.6	15.1	9.1	7.1	10.3	10.7	144	83	11.1	8.8	5	15.1	12.3	7.6	10.4	8.5	15.7	12.4	8.1	15.1	12.1	7.5	10.8	9.7	15	7.9	7.2	22.5	16.6	11	11	9.2
108	2	76	160	65	M	125	77	15.5	7.7	7.2	15.4	10.4	7.3	10.3	10.7	144	83	11.2	8.8	5	12.9	9.8	6.1	10.4	8.5	15.1	12.1	7.6	15.6	12.1	7.8	10.8	9.7	14.7	8.9	7.2	22.4	17.1	10.9	11	9.2
109	2	66	160	80	M	145	91	11.8	0	5.8	15.6	0	7.9	11.1	12.1	168	105	10.2	7.4	4.7	11.1	7.7	5.2	10.1	11	9.5	4.7	4.5	15.4	8.4	7.9	12.1	10.4	11.5	7.2	5.4	13.4	6.2	6.1	11.5	9.8
109	2	66	160	80	M	145	91	11.1	0	5.3	15.6	10.4	7.6	11.1	12.1	168	105	9.9	7.4	4.5	10.3	7.2	4.7	10.1	11	10.1	5.9	4.9	14.3	5.9	7.2	12.1	10.4	9.9	0	4.7	10.8	4.5	4.9	11.5	9.8
109	2	66	160	80	M	145	91	11.3	0	5.3	14.2	2.3	6.9	11.1	12.1	168	105	9.6	7.2	4.3	9.4	5.9	4.1	10.1	11	9.8	4.5	4.7	12.1	5	5.8	12.1	10.4	9.8	6.4	4.6	10.5	5.7	4.7	11.5	9.8
109	2	66	160	80	M	145	91	9.5	0	4.5	14.7	7.7	7.1	11.1	12.1	168	105	9.9	6.4	4.5	8.3	5	3.6	10.1	11	9.7	4.7	4.7	12.6	5.2	6.1	12.1	10.4	10.9	6.2	5.2	10	5.4	4.5	11.5	9.8
109	2	66	160	80	M	145	91	10.7	0	5.1	14.3	1.8	6.9	11.1	12.1	168	105	9.6	6.9	4.3	9	5.7	4	10.1	11	10.7	4.7	5.3	14.5	7.7	7	12.1	10.4	10.5	6.9	4.9	8.5	4.2	3.6	11.5	9.8
110	2	75	166	85	L	132	76	7.5	0	3.2	9.5	0	4.3	13.3	14.4	134	86	12.1	7.9	5.8	14.1	1.9	6.4	13.3	13.5	12.7	8.2	5.9	12.2	8.7	5.3	13.8	12.4	10.6	0	4.7	12.4	7.2	5.3	12	11
110	2	75	166	85	L	132	76	7.6	0	3.2	8.7	0	3.8	13.3	14.4	134	86	11.6	6	5.4	12	0.6	5.2	13.3	13.5	11.3	7.2	5.1	12.3	6.2	5.5	13.8	12.4	11.9	7.7	5.3	11.9	8.2	4.9	12	11
110	2	75	166	85	L	132	76	7.1	0	3	8.4	0	3.6	13.3	14.4	134	86	9.9	6.9	4.5	12.1	7.3	5.3	13.3	13.5	11	3.6	4.9	9.6	0	4.1	13.8	12.4	11	0	5	12.1	8.2	5.1	12	11
110	2	75	166	85	L	132	76	7.1	0	3.3	8.3	0	3.5	13.3	14.4	134	86	9.8	6.9	4.4	11.3	7.6	5	13.3	13.5	12.4	0	5.7	8.5	0	3.6	13.8	12.4	11.7	3.1	5.2	11.3	7.7	4.7	12	11
110	2	75	166	85	L	132	76	7.1	0	3	6.6	0	2.7	13.3	14.4	134	86	9.8	6.8	4.4	10.5	5.7	4.9	13.3	13.5	10.8	0	4.8	11.4	7.2	4.9	13.8	12.4	10.2	0	4.6	11.6	8.7	4.9	12	11
111	1	66	155	61	S	124	76	11.5	6.1	5.1	9.4	0.7	4.2	11.3	13	155	89	12.7	7.2	5.9	13.6	0	6.2	9.9	10.6	15.9	13.9	7.6	19.9	13.9	10	8.3	10.3	14	12.3	6.3	18.4	12.8	8.8	8.9	10.9
111	1	66	155	61	S	124	76	12.2	6.1	5.5	10.4	0	5.7	11.3	13	155	89	13.4	7.7	6.2	14.4	0	6.6	9.9	10.6	15.8	12.8	7.5	18.9	14.4	10.1	8.3	10.3	13.6	11.3	6.1	17.5	10.8	8.3	8.9	10.9
111	1	66	155	61	S	124	76	11.8	5.7	5.3	10.1	0	4.6	11.3	13	155	89	13.2	7.7	6	14.1	0	6.4	9.9	10.6	14.3	11.8	6.7	18.6	14.4	10	8.3	10.3	13.8	11.8	6.3	16.2	11.3	7.7	8.9	10.9
111	1	66	155	61	S	124	76	11.3	3.2	5.1	10.8	5.3	5	11.3	13	155	89	14.4	9.2	6.8	14.2	0	6.6	9.9	10.6	13.9	11.3	6.4	17.8	12.8	9.5	8.3	10.3	13.5	11.3	6.1	15.4	8.2	7.3	8.9	10.9
111	1	66	155	61	S	124	76	11.3	2.5	5.1	11.1	5	5.1	11.3	13	155	89	13.3	8.7	6.1	15.4	0	7.2	9.9	10.6	14.5	11.3	6.8	18.1	13.3	9.7	8.3	10.3	14	11.8	6.4	15.4	9.7	7.3	8.9	10.9
112	1	63	160	78	S	111	68	9.3	6.1	4.3	11	7.5	5.4	11.3	11.6	146	83	11.6	8.7	4.8	17.3	11.3	7.6	10.3	9.9	19.9	15.4	9.1	18.5	12.8	8.5	9.5	8.9	26.8	22.1	11.8	19.5	15.4	9.2	10.4	9.5
112	1	63	160	78	S	111	68	9.4	5	4.2	9.9	6.4	4.5	11.3	11.6	146	83	12.2	9.2	5.1	17.5	11.3	7.7	10.3	9.9	20.1	16.4	9	18.1	13.9	8.4	9.5	8.9	14.9	10.3	6.5	18.3	13.9	8.9	10.4	9.5
112	1	63	160	78	S	111	68	8.7	6.1	3.8	10.5	4.3	5	11.3	11.6	146	83	12.4	9.2	5.3	16.9	11.3	7.5	10.3	9.9	18.6	12.8	8.2	17.5	12.8	8.3	9.5	8.9	14	10.3	6	16.5	12.8	8.1	10.4	9.5
112	1	63	160	78	S	111	68	9.3	5.7	4.2	10.1	5	4.7	11.3	11.6	146	83	12.3	9.2	5.1	17.1	11.8	7.5	10.3	9.9	19.6	14.9	8.8	17.7	12.8	8.3	9.5	8.9	13.8	9.2	5.9	16	11.8	7.8	10.4	9.5
112	1	63	160	78	S	111	68	8.8	5.3	3.9	11	7.1	5.3	11.3	11.6	146	83	11.4	8.7	4.6	16.9	12.3	7.3	10.3	9.9	21.6	18	9.7	17.3	12.6	8.2	9.5	8.9	13.3	9.2	5.6	16	12.8	7.6	10.4	9.5
113	2	68	162	80	L	133	79	23.1	10.3	11.9	15.8	6.2	7.5	7.9	10.2	136	75	12.8	0	5.8	11.5	0	5.2	8.4	9.6	14.4	10.9	6.7	13.7	10.4	6.4	9.3	8	16.8	12.7	7.9	15.8	11.4	8	8.3	8.2
113	2	68	162	80	L	133	79	22.3	11.3	11.3	16.7	2.6	8	7.9	10.2	136	75	13.1	0	5.9	11.2	0	5	8.4	9.6	14.1	9.1	6.7	14	10.4	6.5	9.3	8	16.1	11.4	7.6	15.2	10.4	7.6	8.3	8.2
113	2	68	162	80	L	133	79	22.5	11.8	11.1	16.2	4.6	7.8	7.9	10.2	136	75	10.4	0	4.6	10.9	0	4.9	8.4	9.6	13.4	8.6	6	13.6	9.5	6.4	9.3	8	16.2	11.4	7.6	14.8	10.4	7.3	8.3	8.2
113	2	68	162	80	L	133	79	23.9	13.9	12	16.4	7.7	7.9	7.9	10.2	136	75	10.8	0	4.8	11.8	0	5.3	8.4	9.6	14	9.5	6.4	13.7	10.4	6.4	9.3	8	16.4	9.5	7.7	14.5	11.8	6.9	8.3	8.2
113	2	68	162	80	L	133	79	23.4	11.8	11.7	14.4	0.5	6.9	7.9	10.2	136	75	11.7	5	5.2	12.4	6.1	5.6	8.4	9.6	12.8	9.5	5.6	13.6	9.5	6.2	9.3	8	14.7	10	6.7	14.9	10.4	7	8.3	8.2
114	1	58	160	80	L	133	82	10.7	3.1	4.6	12.6	8.7	5.5	11.4	11.9	139	92	20.5	0.6	10.5	11.4	0.3	4.8	10.4	13.5	18.7	10	9.3	19.2	10.4	9.5	9.3	10.3	16.9	9.1	8.3	16	10	7.5	8.7	10.7
114	1	58	160	80	L	133	82	11.7	7.7	5	12.2	9.2	5.3	11.4	11.9	139	92	17.4	6	8.5	10.5	5.7	4.4	10.4	13.5	17.1	8.6	8.4	17.8	12.7	8.6	9.3	10.3	16.1	8.6	7.8	15.1	10.4	6.8	8.7	10.7
114	1	58	160	80	L	133	82	10.9	7.2	4.7	11.7	8.2	5.1	11.4	11.9	139	92	19.3	6	9.4	11.5	5.7	4.8	10.4	13.5	18.2	10.9	8.9	18.7	13.6	9.3	9.3	10.3	16.1	8.6	7.9	14.6	7.7	6.5	8.7	10.7
114	1	58	160	80	L	133	82	11.4	0	4.8	11.9	4.6	5.4	11.4	11.9	139	92	16.9	3.5	8.1	11.6	6	4.9	10.4	13.5	16.6	7.3	8	18.3	12.7	9	9.3	10.3	17.7	8.2	8.8	15.3	6.8	6.8	8.7	10.7
114	1	58	160	80	L	133	82	12.3	8.2	5.4	11.7	8.2	5.3	11.4	11.9	139	92	16.8	6	7.9	10.9	5.4	4.6	10.4	13.5	19.9	15	9.9	18.4	12.7	9.1	9.3	10.3	16.6	10	8.2	17	8.6	7.7	8.7	10.7
115	1	72	158	50	S	111	66	13.8	8.2	6.2	11.1	0	4.9	9	10.1	143	76	41.2	29	21.2	17.7	12.9	7.8	7.8	7.3	28	16.5	14.1	20	13.7	8.7	5.9	8.1	24.6	10.7	11.8	15.7	9.8	6.8	6.7	8.4
115	1	72	158	50	S	111	66	14.1	8.2	6.3	15	7.3	6.8	9	10.1	143	76	43.6	29	21.7	19.1	13.3	8.6	7.8	7.3	27.8	14.5	14.5	21	14.1	9.2	5.9	8.1	24.8	14.5	11.9	15.8	9.5	6.9	6.7	8.4
115	1	72	158	50	S	111	66	14.6	8.2	6.5	14.4	7.3	6.4	9	10.1	143	76	43.7	29.4	21.5	19.5	12.5	8.6	7.8	7.3	26.6	14.9	13.5	19.5	12.5	8.5	5.9	8.1	25.6	14.5	12.4	15.7	9.8	7	6.7	8.4
115	1	72	158	50	S	111	66	13.7	7.7	6.1	12.7	6.8	5.5	9	10.1	143	76	42.9	30.2	20.9	19.5	15.3	8.6	7.8	7.3	26	14.5	13.3	19.2	12.1	8.4	5.9	8.1	26.7	15.8	13	15.9	10.7	7.2	6.7	8.4
115	1	72	158	50	S	111	66	14.9	9.1	6.7	16	8.6	7	9	10.1	143	76	44.9	29.4	22.3	20	15.3	8.6	7.8	7.3	27.2	15.3	13.9	18.2	11.3	8	5.9	8.1	28.9	16.1	14.1	17.8	11	8.1	6.7	8.4
116	1	73	158	72.5	L	148	85	17.9	14.5	7.8	24.4	10.3	12.2	9.7	9.8	152	94	18.9	15.9	8.7	25.9	20	14.2	9	8.1	23.5	20.9	12.5	26.8	20.5	12.7	9.4	8.1	19.3	16.9	9.3	25.7	18.1	12.8	9.3	8
116	1	73	158	72.5	L	148	85	17.8	14.1	7.7	23.6	8.1	12	9.7	9.8	152	94	18.7	16.4	8.7	26.5	18.6	14.1	9	8.1	20.3	16.9	10.1	27	15.3	12.7	9.4	8.1	19.6	17.3	9.4	24.3	19.3	11.8	9.3	8
116	1	73	158	72.5	L	148	85	17.7	12.1	7.6	22.4	11.8	11.3	9.7	9.8	152	94	20.5	17.3	9.7	25.4	18.6	13.1	9	8.1	21.3	18.5	10.7	27.4	17.3	12.8	9.4	8.1	19.9	17.7	9.6	26.9	22.5	13.3	9.3	8
116	1	73	158	72.5	L	148	85	18.7	14.1	8	23.8	5.9	12	9.7	9.8	152	94	20.9	17.7	10.1	23.9	15.9	12.1	9	8.1	22	18.5	11	30	20.5	14.1	9.4	8.1	19.8	16.9	9.4	26	20.1	12.9	9.3	8
116	1	73	158	72.5	L	148	85	19.5	15.7	8.4	24.2	12.6	12.3	9.7	9.8	152	94	21.7	18.2	10.6	23.9	18.2	12	9	8.1	21.6	18.1	10.5	29.2	19.7	13.7	9.4	8.1	20	18.1	9.5	28.6	23.7	14.5	9.3	8
117	2	59	160	85	XL	135	84	9.6	0	4.2	11	1.9	5.1	10	11.6	147	89	21.2	16.4	11	18.6	0	9.9	8.2	9.8	18.6	0	8.9	17.2	9.3	8.2	9.8	7.6	18.5	11.7	9.4	15	6.8	6.9	9	8.4
117	2	59	160	85	XL	135	84	11.3	3.5	5.1	10.7	0.6	5	10	11.6	147	89	19.7	13.9	10.1	22.2	10	11.9	8.2	9.8	15.3	4.8	7.2	16.2	6.8	7.6	9.8	7.6	17.4	7.2	8.8	13.3	0	6.4	9	8.4
117	2	59	160	85	XL	135	84	11.4	0	5.1	10.3	0	4.7	10	11.6	147	89	19.7	15.3	10.2	23.6	12.1	12.8	8.2	9.8	16.5	4	7.7	16.2	9.3	7.5	9.8	7.6	17.7	9.7	9	14	7.2	6.6	9	8.4
117	2	59	160	85	XL	135	84	10.8	4.4	4.8	12.8	7.9	5.9	10	11.6	147	89	20	16.7	10.9	20.9	6.8	11	8.2	9.8	18.3	9.7	8.7	17.3	11.3	8.2	9.8	7.6	17.7	12.9	8.9	15.1	7.6	7.3	9	8.4
117	2	59	160	85	XL	135	84	11.8	3.8	5.3	12.3	4.1	5.7	10	11.6	147	89	20.5	17.5	11.2	22.7	12.5	12	8.2	9.8	17.9	6.8	8.5	18.1	10.5	8.6	9.8	7.6	21.4	15.3	11.1	15.2	7.2	7.2	9	8.4
118	2	75	159	70	M	111	69	10	6.8	4.4	11.7	8.4	5.1	11.5	10.9	138	86	13.2	6.8	5.7	13.7	6.8	6.4	9.8	10.4	12.4	0	5.4	14.6	6.8	6.4	10.7	9.4	12.5	0	5.7	14.1	8.2	6.4	9.8	9.4
118	2	75	159	70	M	111	69	9	0	3.9	11.8	6	5.1	11.5	10.9	138	86	12.5	6.4	5.4	16.2	2.7	7.8	9.8	10.4	12.4	6.4	5.5	12.9	0	6.1	10.7	9.4	11.8	0	5.3	13.3	0	6.1	9.8	9.4
118	2	75	159	70	M	111	69	9.6	6.8	4.2	10.7	7.6	4.5	11.5	10.9	138	86	12.6	2.3	5.4	15	0	7.2	9.8	10.4	11.1	6.1	4.9	14.1	1.8	5.4	10.7	9.4	12.3	2.9	5.4	12	6.1	5.4	9.8	9.4
118	2	75	159	70	M	111	69	9.5	7.2	4.1	11	8	4.7	11.5	10.9	138	86	11.3	0	4.9	13.9	6.8	6.5	9.8	10.4	9.7	0	4.3	12.9	0	5.9	10.7	9.4	12.3	0	5.6	13.2	7.8	5.9	9.8	9.4
118	2	75	159	70	M	111	69	9.4	3.6	4	11.7	8	5	11.5	10.9	138	86	10.9	0	4.7	14.5	7.7	6.8	9.8	10.4	11.1	0.4	4.9	14.5	4.3	6.6	10.7	9.4	12.2	0	5.4	12.4	5	5.5	9.8	9.4
119	2	63	180	80	M	160	100	12.8	0	6.3	15.9	9.8	7	10.1	11.3	175	109	18.7	9.7	9.6	15.2	0	7.1	11.2	11.4	13.5	0	6.5	15.8	0	7.4	10.8	9.2	11.6	0	5.3	10.1	0	4.4	9.1	9.3
119	2	63	180	80	M	160	100	12.2	0	6	15.7	7.5	6.8	10.1	11.3	175	109	19.7	8.4	10.2	14.5	0	6.8	11.2	11.4	14.9	0	7.2	16	0	7.6	10.8	9.2	12.7	0	5.8	11.3	0	4.9	9.1	9.3
119	2	63	180	80	M	160	100	13.6	0	6.7	15.1	8.7	6.6	10.1	11.3	175	109	19.2	9.7	9.8	14.1	0	6.6	11.2	11.4	14.8	0	7.1	16.4	0	7.8	10.8	9.2	12.5	0	5.7	11	0	4.8	9.1	9.3
119	2	63	180	80	M	160	100	13.5	0	6.7	13.2	0	5.6	10.1	11.3	175	109	17.9	8.9	9	14.5	2.4	6.8	11.2	11.4	14.4	0	6.8	19.2	5.3	9.3	10.8	9.2	12.7	0	5.6	10.5	0	4.6	9.1	9.3
119	2	63	180	80	M	160	100	11.8	0	5.9	13.3	1.2	5.6	10.1	11.3	175	109	18.6	9.7	9.5	14.4	0	6.9	11.2	11.4	16.2	0	7.7	16.6	0	7.8	10.8	9.2	11.8	0	5.1	10.7	0	4.6	9.1	9.3
120	1	69	166	68	S	152	88	15.7	12.1	6.9	21.3	14.6	11.1	8	8.4	152	68	15.3	11.2	6.9	12.1	10.3	5.4	9.3	9.1	14.1	10.9	6.1	13.4	10.9	5.8	8.2	8.5	14.3	11.3	6.2	16	14.1	7	8.2	9.3
120	1	69	166	68	S	152	88	15.2	10.7	6.6	19.2	13.2	9.7	8	8.4	152	68	14.4	10.1	6.5	12.5	9.2	5.6	9.3	9.1	13.6	11.3	5.9	12.8	9.7	5.5	8.2	8.5	14.2	12.1	6.2	15.8	13.7	6.9	8.2	9.3
120	1	69	166	68	S	152	88	13.7	10.7	5.9	20	13.9	10.2	8	8.4	152	68	14.8	11.5	6.7	12.7	10.6	5.7	9.3	9.1	13.5	10.9	5.8	13.1	9.7	5.7	8.2	8.5	15.4	12.1	6.7	15.6	13.7	6.8	8.2	9.3
120	1	69	166	68	S	152	88	14.7	11.4	6.3	19.7	15.3	10	8	8.4	152	68	15.8	11.5	7.1	12.8	10.9	5.6	9.3	9.1	13.3	10.9	5.8	13.1	9.7	5.7	8.2	8.5	15.6	13.3	6.8	15	13.3	6.6	8.2	9.3
120	1	69	166	68	S	152	88	14.7	11.4	6.4	19.3	12.8	9.7	8	8.4	152	68	15.7	12	7.2	12.7	10.9	5.5	9.3	9.1	13.8	10.5	6	13.5	10.5	5.9	8.2	8.5	14.5	11.7	6.3	14.7	12.9	6.5	8.2	9.3
121	1	63	158	65	M	127	65	13.5	0	6	13	2.9	6	11	9.7	113	72	15.1	6.8	6.9	17.1	0.4	7.8	12.4	12.3	12	7.6	5.2	24	13.7	11	9.5	11.4	12.2	7.2	5.6	22.4	17.7	11	10.1	10.5
121	1	63	158	65	M	127	65	13.3	0	6.1	13.6	7.8	6.3	11	9.7	113	72	16	7.2	7.3	17.1	0.4	7.8	12.4	12.3	14.7	7.6	6.6	26.3	16.1	12.4	9.5	11.4	16.5	9.3	7.6	18.6	12.1	8.6	10.1	10.5
121	1	63	158	65	M	127	65	14.7	0	6.7	14.4	0	6.8	11	9.7	113	72	16.4	8	7.5	18.1	1.6	8.2	12.4	12.3	13.2	7.2	5.9	25.8	14.9	12	9.5	11.4	16.3	9.3	7.3	18.2	12.5	8.4	10.1	10.5
121	1	63	158	65	M	127	65	11.4	0	5.1	17	10.7	8.1	11	9.7	113	72	16.5	7.6	7.5	16.8	0	7.5	12.4	12.3	13.2	8	5.9	25.7	15.3	11.7	9.5	11.4	15.8	8.9	7.1	19	13.7	8.8	10.1	10.5
121	1	63	158	65	M	127	65	14.4	0	6.4	16.6	7.1	8	11	9.7	113	72	16.7	7.6	7.6	16.7	1.2	7.4	12.4	12.3	14	7.2	6.2	27.6	16.5	13.1	9.5	11.4	16.5	8.9	7.5	17.4	10.9	7.9	10.1	10.5
122	2	75	156	70	M	130	76	11.1	5.3	4.8	15	6.4	7	10.4	10.9	132	75	14.6	11.3	6.9	21.4	12.5	10	11.9	11.8	14.3	9.1	6.6	20	9.5	9.9	11.8	10.3	13.9	11	6.5	19.4	11.4	9.7	10.9	8.5
122	2	75	156	70	M	130	76	10.9	3.6	4.7	14	6.1	6.7	10.4	10.9	132	75	15.2	11.7	7.3	22.7	13.3	10.6	11.9	11.8	14	9.1	6.7	18.9	7.3	9.3	11.8	10.3	13	9.6	5.9	19.7	9.3	10	10.9	8.5
122	2	75	156	70	M	130	76	11.1	6.8	4.7	13.7	5.7	6.6	10.4	10.9	132	75	15	10.5	7.3	21.9	12.1	10.3	11.9	11.8	13.5	9.1	6.4	18.5	8.2	9.1	11.8	10.3	12.8	9.6	5.9	18.8	6.4	9.1	10.9	8.5
122	2	75	156	70	M	130	76	10.9	5.3	4.7	13.4	5.7	6.5	10.4	10.9	132	75	14.9	8.9	7.3	23.9	13.3	11.5	11.9	11.8	13.3	8.2	6.3	18.9	9.5	9.3	11.8	10.3	12.2	8.9	5.6	23.9	10.7	11.9	10.9	8.5
122	2	75	156	70	M	130	76	11.3	6.8	4.9	12.6	1.4	6.1	10.4	10.9	132	75	15	10.9	7.4	23.9	13.7	11.5	11.9	11.8	13.3	8.2	6.3	19.4	9.5	9.5	11.8	10.3	13	8.2	6.1	22.3	7.5	11.1	10.9	8.5
123	2	68	178	85	L	154	85	10.4	0	4.8	13.2	0	6.8	14.4	12	151	92	9	6.4	4	9.3	5.7	3.9	15	16.3	8.1	6.4	3.3	9.3	7.8	3.9	14.2	15.6	7.2	1.1	3	9.1	6.4	3.8	14.4	15.1
123	2	68	178	85	L	154	85	11	0	5.1	15.1	0	7.9	14.4	12	151	92	8.9	3.2	4	9.6	7.5	4	15	16.3	7.9	6.4	3.2	9.8	7.8	4.1	14.2	15.6	7.5	6.1	3.1	8.8	6.8	3.6	14.4	15.1
123	2	68	178	85	L	154	85	11	0	4.9	14.5	0	7.5	14.4	12	151	92	9.1	6.8	4.1	9.2	6.4	3.8	15	16.3	7.2	7.2	2.9	9.5	7.8	3.9	14.2	15.6	7.5	5.3	3.1	8.6	5.3	3.5	14.4	15.1
123	2	68	178	85	L	154	85	9.7	0	4.3	13.5	0	7.1	14.4	12	151	92	8.7	6.4	3.9	9.1	6.1	3.8	15	16.3	7.2	7.2	2.9	9.8	7.8	4.1	14.2	15.6	7.4	3.2	3.1	8.6	5.7	3.5	14.4	15.1
123	2	68	178	85	L	154	85	10.9	0	4.8	14	0	7.4	14.4	12	151	92	8.6	6.4	3.8	9.3	6.4	3.9	15	16.3	7.5	7.5	3	9.8	8.2	4.1	14.2	15.6	7.7	5.7	3.2	8.7	6.1	3.6	14.4	15.1
124	1	72	158	55	S	127	81	18.9	13.7	8.7	16.2	11.3	7.5	9	9.7	140	77	11.5	3.2	5	13.8	3.6	6.2	9.4	8.3	9.7	0	4.2	10.2	3.2	4.4	7.9	9	8.8	1.9	3.6	9.2	0	3.9	7.9	9.5
124	1	72	158	55	S	127	81	18.4	13.7	8.2	15.9	10.9	7.2	9	9.7	140	77	10.8	0	4.7	13.2	0	5.7	9.4	8.3	9.3	0	4.2	10	0	4.2	7.9	9	9.2	0	3.9	8.1	0	3.4	7.9	9.5
124	1	72	158	55	S	127	81	17.7	13.7	7.7	15.6	10.5	7	9	9.7	140	77	11.2	0	4.9	11.2	3.9	4.7	9.4	8.3	10.1	0.3	4.5	9.5	3.2	4	7.9	9	9.3	0	3.8	7.9	0	3.3	7.9	9.5
124	1	72	158	55	S	127	81	17.3	12.5	7.5	15.8	9.3	7	9	9.7	140	77	10.1	0	4.3	12.8	3.2	5.5	9.4	8.3	8.3	0	3.6	8.9	1.9	3.7	7.9	9	8.1	0.9	3.2	10.3	0	4.4	7.9	9.5
124	1	72	158	55	S	127	81	18.3	12.9	7.9	13.5	8	5.9	9	9.7	140	77	10.8	0.7	4.6	11.8	3.6	5	9.4	8.3	8.4	0	3.6	9.3	0.36	3.8	7.9	9	8.7	0	3.7	9.2	0	3.8	7.9	9.5
125	1	67	156	65	L	136	98	18.5	12.1	9.4	18.4	8	10.3	7.4	7.8	153	90	21.7	14.9	11.3	23.9	16.9	12.9	8.4	10.7	15	11.8	7	15.1	12.5	7.2	7.7	9.8	13.2	10.7	6.2	13	12.1	6.5	8	8.1
125	1	67	156	65	L	136	98	18.3	13.3	9.3	15.9	7.6	8.1	7.4	7.8	153	90	22.6	15.7	12.1	22.3	15.7	11.6	8.4	10.7	13.2	10.7	6.4	14.8	12.5	7.1	7.7	9.8	13.1	11	6	13.8	12.1	6.5	8	8.1
125	1	67	156	65	L	136	98	18.9	11.7	9.5	13.6	8	6.6	7.4	7.8	153	90	20.9	15.3	10.8	23	16.9	11.7	8.4	10.7	13.3	11	6.4	13.7	11.4	6.2	7.7	9.8	13.2	10.7	6.1	13.6	11.8	6.4	8	8.1
125	1	67	156	65	L	136	98	19.6	14.1	10	14.6	6.8	6.9	7.4	7.8	153	90	20.3	14.9	10.3	23.5	17.3	12.4	8.4	10.7	13	10.3	6.2	12.7	10.3	5.7	7.7	9.8	12.6	10.3	5.8	13	10.7	6.1	8	8.1
125	1	67	156	65	L	136	98	19.9	14.1	10	15.3	9.3	7.2	7.4	7.8	153	90	22.1	17.7	11.5	23.8	12.9	12.4	8.4	10.7	13.4	11	6.5	13	11.4	5.9	7.7	9.8	14	10.3	6.5	12.9	11	6.1	8	8.1
126	2	60	175	80	M	151	80	11.3	0	4.9	12.6	8.2	5.3	13.1	13.2	168	97	13.6	10	5.8	17.7	15.7	7.9	14.6	12.5	8.3	5.9	3.5	10.3	8.4	4.6	12.1	13.8	9	6.7	3.9	11.3	9.5	4.9	10.6	14.3
126	2	60	175	80	M	151	80	10.9	0	4.7	12.1	8.5	5.2	13.1	13.2	168	97	13.3	7.5	5.7	17.6	15.3	7.9	14.6	12.5	7.7	4.8	3.2	10.7	8.9	4.7	12.1	13.8	8.6	7	3.6	11.2	9.5	4.9	10.6	14.3
126	2	60	175	80	M	151	80	12.5	5.1	5.5	12.8	9.5	5.5	13.1	13.2	168	97	13.2	9.3	5.8	17.2	14.6	7.7	14.6	12.5	8.5	5.3	3.6	12.1	9.5	5.3	12.1	13.8	8.4	6.7	3.5	10.5	9.2	4.6	10.6	14.3
126	2	60	175	80	M	151	80	12	3.5	5.2	12.9	8.5	5.6	13.1	13.2	168	97	13	9.3	5.7	16.8	14.3	7.4	14.6	12.5	8.2	4.8	3.5	11.5	9.8	5	12.1	13.8	8.3	6.1	3.5	11.2	9.2	4.9	10.6	14.3
126	2	60	175	80	M	151	80	11.4	2.2	5	12.2	8.8	5.2	13.1	13.2	168	97	11.8	8.2	5.1	16.8	13.2	7.3	14.6	12.5	8.5	5.6	3.6	11.4	9.5	4.9	12.1	13.8	8.4	6.1	3.6	11.3	8.7	4.5	10.6	14.3
127	1	73	163	67	S	128	77	15.3	5.6	7	18.1	5	8.8	9.5	8.9	159	88	19.7	13.7	9.4	21.2	0	10.4	8.7	9.1	16.4	12	8	16.4	12.6	9.3	9.4	7.1	16.5	12	7.2	21.9	13.9	11	8	6.5
127	1	73	163	67	S	128	77	14.2	0	6.6	18.6	7	9.1	9.5	8.9	159	88	19.1	13.7	9.2	21.5	12.9	10.3	8.7	9.1	16.9	10.7	8.4	16.2	11	9.1	9.4	7.1	15.6	10.1	7.8	21	13.6	10.6	8	6.5
127	1	73	163	67	S	128	77	14.6	0	6.9	19.1	8.7	9.4	9.5	8.9	159	88	17.9	10.1	8.7	19.1	12.5	8.7	8.7	9.1	16.6	10.7	8.2	17.6	12.6	8.6	9.4	7.1	15.1	9.5	7.4	21.3	13.3	10.9	8	6.5
127	1	73	163	67	S	128	77	16.3	6.1	7.7	17.7	7.5	8.8	9.5	8.9	159	88	17.4	11.7	8.2	20.8	9.7	9.5	8.7	9.1	16.7	11.4	8.4	17.6	12.6	8.6	9.4	7.1	15.2	10.7	7.4	20	12.6	10.1	8	6.5
127	1	73	163	67	S	128	77	15.2	5	7	18.5	7.5	9.2	9.5	8.9	159	88	16.6	10.5	7.6	18.6	12.9	8.6	8.7	9.1	17.1	12.3	8.6	17.8	11	8.4	9.4	7.1	15.6	7.9	7.7	19.4	13.3	9.7	8	6.5
128	1	60	176	100	XL	121	75	10.7	4.8	5	15	2.5	7.6	13.4	13.3	157	98	12.2	8.5	5.7	22.2	17.4	12	11.1	11.2	14	9.1	6.5	13.6	9.5	6	8.1	8.7	18.2	13.6	9.1	18.7	15	9	8.3	8.4
128	1	60	176	100	XL	121	75	10.4	0	4.8	14.2	8.1	7.1	13.4	13.3	157	98	11.4	7.9	5.2	21.2	15.5	11	11.1	11.2	12.9	3.2	5.9	13.7	9.5	6	8.1	8.7	18.6	13.6	9.3	18.2	14.5	8.6	8.3	8.4
128	1	60	176	100	XL	121	75	9.9	0	4.6	14.2	7.8	7.1	13.4	13.3	157	98	12.2	8.5	5.7	20.6	16.1	10.8	11.1	11.2	12.9	8.6	5.6	14.5	10.9	6.5	8.1	8.7	18	12.7	9	16.9	13.6	7.9	8.3	8.4
128	1	60	176	100	XL	121	75	10.9	1.7	5.1	13.3	7	6.6	13.4	13.3	157	98	12.1	8.5	5.7	20	16.1	10.5	11.1	11.2	12.3	8.2	5.2	15	10.9	6.8	8.1	8.7	18	12.7	9.2	17.4	14.1	8.2	8.3	8.4
128	1	60	176	100	XL	121	75	10.6	4.8	4.9	14	5.6	6.9	13.4	13.3	157	98	11.7	7.9	5.6	19.9	15.5	10.3	11.1	11.2	12.4	8.6	5.2	14.5	10.4	6.5	8.1	8.7	18.2	12.7	9.3	17.4	14.1	8.3	8.3	8.4
129	2	57	465	95	XL	164	86	10.9	5.6	5	12.6	8.1	5.7	12.6	11.3	153	92	8.8	4.8	3.8	9	6.7	3.7	10.6	9.1	10.5	6.7	4.6	8.6	6.1	3.6	10.4	12.7	8.4	4.8	3.6	8	4.5	3.6	10	10.2
129	2	57	465	95	XL	164	86	10.4	5.3	4.8	12.8	7.5	5.8	12.6	11.3	153	92	8.6	5	3.7	8.8	6.1	3.6	10.6	9.1	10.1	7	4.5	8.1	5.9	3.3	10.4	12.7	8.4	5.3	3.6	8.3	6.4	3.8	10	10.2
129	2	57	465	95	XL	164	86	11.1	6.4	5.1	12.4	8.4	5.5	12.6	11.3	153	92	8.5	5	3.6	8.8	5.9	3.9	10.6	9.1	10.2	6.7	4.5	8.7	7	3.7	10.4	12.7	8.5	5.9	3.6	8	4.8	3.6	10	10.2
129	2	57	465	95	XL	164	86	10.9	5.9	5	12.2	7.5	5.3	12.6	11.3	153	92	7.9	4.8	3.4	9.1	6.4	4	10.6	9.1	10.3	7	4.6	8.6	6.1	3.6	10.4	12.7	8.6	5.9	3.7	8.2	5.6	3.7	10	10.2
129	2	57	465	95	XL	164	86	11.1	6.7	5.1	12.8	7.8	5.8	12.6	11.3	153	92	8.1	4.5	3.4	9.1	5	4	10.6	9.1	10.4	7	4.6	8.4	5.6	3.5	10.4	12.7	8.6	4.8	3.7	8.5	5.6	3.8	10	10.2
130	1	68	165	74	M	136	81	14.9	6.7	7.2	14.5	7.8	7	10.4	11	166	79	14.6	4.1	7.2	25	11.8	11.6	8.9	8.9	26.6	17.1	12.3	14.7	8.2	6.7	8.3	10.3	25.4	14.3	12.6	14.2	8.2	6.5	6.7	9.2
130	1	68	165	74	M	136	81	14.1	8.7	6.7	15	7.8	7	10.4	11	166	79	11.7	0	5.5	19.6	13.6	8.8	8.9	8.9	25.3	18.2	11.3	15.1	6.8	6.9	8.3	10.3	23.6	11.8	12.7	12.9	8.2	5.9	6.7	9.2
130	1	68	165	74	M	136	81	13.4	6.4	6.3	14.2	7.5	6.4	10.4	11	166	79	17	9.1	8	18	10.9	8.6	8.9	8.9	23.2	17.8	10.3	15.7	8.9	7.1	8.3	10.3	21.2	11.4	10.9	13.1	7.5	6.1	6.7	9.2
130	1	68	165	74	M	136	81	13.8	8.4	6.6	13.6	6.4	6.1	10.4	11	166	79	17.2	8.2	8.1	20.9	12.3	9.9	8.9	8.9	25.1	19.6	11.2	14.8	8.2	6.8	8.3	10.3	21.4	12.1	11	13.8	7.1	6.4	6.7	9.2
130	1	68	165	74	M	136	81	15.4	8.1	7.4	13.5	7.5	5.9	10.4	11	166	79	16.8	7.7	7.9	17.7	9.5	7.9	8.9	8.9	22.6	18.9	9.9	14.6	7.1	6.7	8.3	10.3	10.2	10.3	10.2	12.9	7.5	5.9	6.7	9.2
131	2	62	148	69	L	138	86	12.8	6.1	6	17.1	9.5	8.1	11.2	11.7	135	89	30.5	9.6	16.3	11.5	3.2	5.3	8.4	9.9	27.2	7.1	14.6	13.9	7.5	6.3	8.4	7.5	16.7	7.8	7.5	10.2	0.4	4.5	8.1	9.2
131	2	62	148	69	L	138	86	13.3	7.5	6.3	17.8	12.3	8.4	11.2	11.7	135	89	26.7	9.3	13.5	11.1	0	5.1	8.4	9.9	24.5	6.4	13.3	13.2	8.9	6	8.4	7.5	16.4	4.6	7.4	10.7	4.3	4.8	8.1	9.2
131	2	62	148	69	L	138	86	14	5.9	6.5	15.8	9.8	7.3	11.2	11.7	135	89	27.8	8.9	13.7	11.8	7.5	5.3	8.4	9.9	25.3	6.1	13.8	13	8.2	5.7	8.4	7.5	16.8	5.3	7.6	10.6	1.8	4.7	8.1	9.2
131	2	62	148	69	L	138	86	13.1	7.5	6	15.6	10.1	7.1	11.2	11.7	135	89	28.3	9.6	13.7	11.8	6.8	5.3	8.4	9.9	24.1	6.4	13	13.3	7.8	5.9	8.4	7.5	15.4	5.3	7	11.4	1.1	4.9	8.1	9.2
131	2	62	148	69	L	138	86	14.3	6.7	6.5	16.2	10.9	7.3	11.2	11.7	135	89	27.4	13.2	13.3	11.5	6.8	5.1	8.4	9.9	24.7	6.8	13.2	12.8	6.4	5.6	8.4	7.5	15.7	3.2	7.1	11.6	0.4	5.1	8.1	9.2
132	2	74	75	150	M	136	75	7.5	0	3.2	9.6	2.2	4.6	15.1	15.8	173	89	5.9	0	2.5	7.9	5.3	3.3	14.6	17.5	5.9	2.6	2.6	5.6	2.6	2.5	12.5	16.6	5.4	2.9	2.3	5.8	4.1	2.6	12.6	16.4
132	2	74	75	150	M	136	75	8	0	3.4	9.4	4.7	4.3	15.1	15.8	173	89	6.1	0	2.6	8.4	5	3.6	14.6	17.5	6.2	2.6	3.7	5.5	2.6	2.4	12.5	16.6	5.7	2.4	2.5	5.9	3.4	2.6	12.6	16.4
132	2	74	75	150	M	136	75	8.4	0	3.6	8.7	0	3.9	15.1	15.8	173	89	5.7	0	2.4	7.9	5.6	3.4	14.6	17.5	6.9	3.4	3.1	5.5	2.1	2.4	12.5	16.6	5.5	3.3	2.4	5.7	3.4	2.5	12.6	16.4
132	2	74	75	150	M	136	75	7.9	0	3.5	10.3	1	4.6	15.1	15.8	173	89	5.1	0	2.1	8.1	4.8	3.5	14.6	17.5	6.3	3.1	2.8	6	2.2	2.7	12.5	16.6	5.3	3.3	2.3	5.6	3.3	2.5	12.6	16.4
132	2	74	75	150	M	136	75	9.1	0	4	9.5	0.7	4.3	15.1	15.8	173	89	6	0	2.5	8	5.6	3.4	14.6	17.5	6.1	3.4	2.7	5.2	2.2	2.3	12.5	16.6	5.3	1.2	2.3	5.9	3.4	2.6	12.6	16.4
133	1	55	170	100	L	117	78	9.1	4.2	4.1	7.7	0	3.3	13.1	13.3	96	71	8.2	5.6	3.4	7.2	5	2.9	11.9	11.9	7.1	4	2.9	5.7	3.8	2.4	10.1	11.6	7.1	3.8	9.2	9.2	6.9	3.9	10.3	11.8
133	1	55	170	100	L	117	78	8.9	5	4	7	1.2	3	13.1	13.3	96	71	8.3	5.9	3.4	7.6	5	3.1	11.9	11.9	6.7	3.6	2.8	6	4.3	2.5	10.1	11.6	7.1	3.3	8	8	5.8	3.5	10.3	11.8
133	1	55	170	100	L	117	78	9.6	5.4	4.3	7.3	0	3.1	13.1	13.3	96	71	7.6	3.6	3.1	7.7	5	3.1	11.9	11.9	6.7	4.1	2.8	6.3	4.6	2.6	10.1	11.6	6.9	4.1	8	8	5.8	3.5	10.3	11.8
133	1	55	170	100	L	117	78	9	5.4	4.1	7.6	0	3.3	13.1	13.3	96	71	8.2	5.6	3.4	7.7	5.9	3.1	11.9	11.9	7.3	4.1	3.1	6.6	4.5	2.7	10.1	11.6	6.6	3.6	7.7	7.7	5	3.4	10.3	11.8
133	1	55	170	100	L	117	78	8.8	5.2	3.9	6.4	0	2.7	13.1	13.3	96	71	7.5	5	3.1	7.3	5.3	3.1	11.9	11.9	7	4.1	3	6.4	4.1	2.6	10.1	11.6	7.3	4.3	8	8	5.5	3.4	10.3	11.8
134	1	64	155	70	M	120	75	10.2	0	4.5	15.2	6.4	6.8	8.3	9.8	156	96	23.6	16.9	11	21.7	17.3	9.3	8.6	9	26.9	22.8	13.8	13.5	9.5	5.7	7.3	8.6	30.7	25	14.5	23.6	17.4	10.3	6.5	7.6
134	1	64	155	70	M	120	75	10.2	0	4.4	13.5	7.5	6	8.3	9.8	156	96	24.6	19.7	11.4	21.2	16.5	9.6	8.6	9	27.6	22.3	14.2	14	11.4	5.9	7.3	8.6	29.6	22.3	14.6	22.5	17	10.3	6.5	7.6
134	1	64	155	70	M	120	75	11.6	5.7	5.2	14	6.1	6.2	8.3	9.8	156	96	25.3	20.1	11.6	20.8	16.5	9.1	8.6	9	29.1	24.6	15.1	13.7	10.7	5.8	7.3	8.6	29.9	25.5	14.8	23.1	17	10.5	6.5	7.6
134	1	64	155	70	M	120	75	11.2	6.1	5	13.6	7.5	6.1	8.3	9.8	156	96	24.7	19.3	11.4	21.7	16.1	9.6	8.6	9	26.7	22.8	14.1	13.9	10.4	5.8	7.3	8.6	29.4	25	14.5	24.6	17	11.3	6.5	7.6
134	1	64	155	70	M	120	75	10.3	5.3	4.6	13	6.1	5.8	8.3	9.8	156	96	24.7	20.1	11.3	23.7	18.5	10.6	8.6	9	29.1	25.5	15.3	15.5	11.4	6.6	7.3	8.6	29.4	25.5	14.5	26.4	20.1	12.3	6.5	7.6
135	1	55	148	67	M	133	84	10.5	0	4.7	10.6	0	4.9	10.2	9.4	160	85	8.9	0	4	15.8	0.8	8.2	9.8	8.6	10.1	0	4.4	16.2	0.4	8.3	8	8.9	11	0	4.9	14.2	0	6.8	8.2	8.2
135	1	55	148	67	M	133	84	10.2	0	4.6	12.1	0.4	5.5	10.2	9.4	160	85	9.3	0	4.3	16.4	0	8.6	9.8	8.6	10.6	0	4.5	15.4	0.8	7.7	8	8.9	11.6	1.6	5	14.4	0.4	6.9	8.2	8.2
135	1	55	148	67	M	133	84	10.1	0	4.7	9.8	0	4.6	10.2	9.4	160	85	9.1	0	4.2	15.9	0	8.1	9.8	8.6	10.4	0	4.6	15.4	0.4	7.6	8	8.9	11.6	2.8	4.9	15.1	0	7.3	8.2	8.2
135	1	55	148	67	M	133	84	10.8	0	4.9	10.6	0	4.9	10.2	9.4	160	85	9.2	0	4.2	16.3	0	8.4	9.8	8.6	9.9	0	4.3	15.4	0	7.7	8	8.9	12.8	1.6	5.6	14.8	0.8	7.2	8.2	8.2
135	1	55	148	67	M	133	84	10.3	0	4.7	10.2	0	4.7	10.2	9.4	160	85	9.2	0	4.3	15.5	0	8	9.8	8.6	10.8	0	4.9	15.8	0.8	7.9	8	8.9	12.6	0.4	5.5	13.7	0	6.5	8.2	8.2
136	2	65	156	65	L	121	74	13.7	10.1	6.5	24.6	13.9	11.6	9.5	8.5	141	91	11.9	8.9	5.1	19.7	15.7	9	8	7	13.8	10.5	6.1	25.4	18.1	12.4	8.3	6.3	12.6	6.8	5.5	24.5	12.3	11.3	7.8	6.2
136	2	65	156	65	L	121	74	13.6	10.4	6.2	25.7	18.9	12.4	9.5	8.5	141	91	12.2	10.1	5.2	19.1	10.5	8.8	8	7	13.3	9.7	5.9	23.7	8	11.5	8.3	6.3	12.2	0	5.2	18.2	8.4	8.1	7.8	6.2
136	2	65	156	65	L	121	74	13.9	8.8	6.3	21.8	9.5	10.4	9.5	8.5	141	91	11.9	8.4	5.1	21.5	16.5	9.9	8	7	12.9	7.6	5.7	20.5	12.9	9.6	8.3	6.3	12.3	5.2	5.4	14.9	0	6.5	7.8	6.2
136	2	65	156	65	L	121	74	14.8	12	6.8	22.5	12.3	10.6	9.5	8.5	141	91	11.9	8.9	5.1	21.8	14.9	10.2	8	7	13	10.1	5.7	19.2	12.5	8.7	8.3	6.3	13.4	8.9	5.9	18.3	2	8.3	7.8	6.2
136	2	65	156	65	L	121	74	14.7	10.4	6.7	21.8	12	10.1	9.5	8.5	141	91	11.2	0	4.8	21.5	16.9	9.7	8	7	13.4	10.5	6	22.8	10.1	10.5	8.3	6.3	13.3	9.3	5.9	20.5	8.4	9.4	7.8	6.2
137	2	61	150	40	S	129	62	16.8	3.9	7.8	15.6	0	7	7.2	7	145	83	21.2	13.6	10.1	33.7	18.6	16.5	8.5	7.3	22.6	15.5	10.6	44.7	20.7	22	7.4	6.9	20.3	15.9	10	39.5	8.1	14.6	8.1	7
137	2	61	150	40	S	129	62	17.2	0	7.8	16.6	2.1	7.4	7.2	7	145	83	22.3	15.4	10.9	33.9	22.3	17.1	8.5	7.3	24	17	11.5	44.7	33.2	22.3	7.4	6.9	21.2	11.8	10.2	30.4	22.2	15	8.1	7
137	2	61	150	40	S	129	62	15.1	0	6.7	18.1	0.7	8.1	7.2	7	145	83	22	12.7	10.6	33.5	25.4	16.6	8.5	7.3	23.9	13.3	11.2	44	33.2	21.9	7.4	6.9	22.7	8.2	10.5	28	18.5	13.5	8.1	7
137	2	61	150	40	S	129	62	17.5	0	7.8	20.6	5.7	9.3	7.2	7	145	83	24.5	12.3	11.7	33.2	22.7	15.7	8.5	7.3	24.9	15.5	11.8	31.5	20.7	15.3	7.4	6.9	22.4	17.3	10.4	15.7	9.6	12.1	8.1	7
137	2	61	150	40	S	129	62	18.6	0	8.2	17.7	0.4	7.9	7.2	7	145	83	22.4	13.2	10.4	31.9	20	15.1	8.5	7.3	24.6	3.7	11.4	31.1	0	15	7.4	6.9	21.6	2.7	9.9	22.2	11.1	10.4	8.1	7
138	2	59	167	80	M	130	85	10.7	0	4.5	10.1	0.3	4.4	13	12.9	133	75	13.3	0	6.2	12.9	0.4	6	10.4	11.2	19.5	9.5	9.2	11.9	8.2	5.4	9.2	11.9	15.9	7.7	7.4	13.2	7.3	6.1	10	11.7
138	2	59	167	80	M	130	85	11.1	0	5	10.4	2.5	4.5	13	12.9	133	75	15.7	5.7	7.3	15.2	6.1	7.2	10.4	11.2	17.8	8.6	8.2	12	7.3	5.5	9.2	11.9	17.2	9.5	8.4	13.4	0	6.1	10	11.7
138	2	59	167	80	M	130	85	12.7	5.1	5.8	9.9	0	4.4	13	12.9	133	75	19.3	12.1	9.3	16.1	11.8	7.7	10.4	11.2	14.5	0	6.5	12.9	9.5	6.1	9.2	11.9	16.9	10	8.2	13.6	7.7	6.3	10	11.7
138	2	59	167	80	M	130	85	12.1	3.8	5.4	10.2	0	4.5	13	12.9	133	75	14.5	0	6.8	15.5	7.5	7.3	10.4	11.2	13.3	0	5.9	12.2	7.7	5.6	9.2	11.9	18.3	14.5	9.1	14.6	8.2	6.9	10	11.7
138	2	59	167	80	M	130	85	11.7	0	5.3	10.2	0	4.4	13	12.9	133	75	14.2	0	6.6	15	8.6	7	10.4	11.2	16.5	11.4	7.5	12.9	9.5	6.1	9.2	11.9	16.6	9.1	8.2	15.2	8.2	7.3	10	11.7
139	2	58	158	67.5	M	118	79	12.7	8	5.5	11	0	4.6	9.9	9.8	154	86	16.5	11.4	7.6	11.9	7.8	5.2	8	7.9	12.2	10	5.4	13.6	8.2	6	11.3	7.3	12.7	10.3	5.7	15.7	9.6	7.1	9.3	7
139	2	58	158	67.5	M	118	79	12.3	7.6	5.3	10.6	0	4.3	9.9	9.8	154	86	15.4	12.1	7	11.2	7.5	4.9	8	7.9	11.8	9.3	5.1	10.9	4.6	4.6	11.3	7.3	13	10	5.9	11.6	6.8	5	9.3	7
139	2	58	158	67.5	M	118	79	12.7	6.8	5.5	10.6	0	4.3	9.9	9.8	154	86	14.7	10.7	6.6	11.2	6.4	4.9	8	7.9	11.7	9.3	4.9	10.5	6.4	4.4	11.3	7.3	12.6	10.7	5.7	12.3	8.2	5.4	9.3	7
139	2	58	158	67.5	M	118	79	11.9	7.2	5.1	11.6	0	4.7	9.9	9.8	154	86	15.1	9.6	6.8	10.3	6.1	4.5	8	7.9	11	8.9	4.5	11.8	6.8	5.1	11.3	7.3	13.4	11	6	12.2	8.2	5.2	9.3	7
139	2	58	158	67.5	M	118	79	12.1	8	5.2	11.2	0	4.5	9.9	9.8	154	86	15.8	12.5	7.2	11.5	6.8	5	8	7.9	11	8.6	4.5	10.6	7.8	4.5	11.3	7.3	12.9	11	5.8	13.7	8.6	5.9	9.3	7
140	1	59	161	62.5	S	106	69	12.4	6	5.6	13.9	11.4	6.4	9.3	10.1	137	87	13.5	7.2	6	13.3	9.7	5.8	9.5	10.9	25.8	19.3	12.3	16.8	13.7	7.3	8	9.2	26.6	18.9	12.5	16.8	14.5	7.5	7.2	9
140	1	59	161	62.5	S	106	69	11.7	6.3	5	13.1	9.5	5.8	9.3	10.1	137	87	13.3	8.9	6	13.9	10.5	6	9.5	10.9	25.7	18.9	12.3	18.6	15.7	8.5	8	9.2	28.9	22.9	13.6	16.9	14.5	7.5	7.2	9
140	1	59	161	62.5	S	106	69	13.3	7.6	5.7	13.3	10.7	5.9	9.3	10.1	137	87	12.4	6.8	5.5	14.2	11.3	6.2	9.5	10.9	26.2	20.5	12.5	19.3	16.5	8.9	8	9.2	28.2	22.2	13.4	16.1	13.3	7.1	7.2	9
140	1	59	161	62.5	S	106	69	12.8	6	5.4	13.1	8.8	5.8	9.3	10.1	137	87	13.1	7.6	5.8	14.3	11.3	6.3	9.5	10.9	28.4	22.1	13.8	15.1	13.3	6.8	8	9.2	27.3	19.9	13	16	13.7	7	7.2	9
140	1	59	161	62.5	S	106	69	14.3	8.8	6.4	13.3	10.7	5.9	9.3	10.1	137	87	12.7	8	5.6	14.2	10.9	6.2	9.5	10.9	29.1	23.3	14.4	17.9	14.9	7.9	8	9.2	26.6	20.7	12.7	15.1	12.9	6.7	7.2	9
141	2	51	170	70	M	141	75	13.2	4.7	6.1	9.6	0	4.2	10.1	10.9	150	76	25.4	8.4	12.2	16.3	4	7.3	8.1	7.8	26.4	7.4	12.8	18.5	7.4	8.5	6.6	7.6	20.3	6.7	9.7	13.4	0	6	6.8	7.5
141	2	51	170	70	M	141	75	11.9	5.1	5.5	10.8	2.8	4.8	10.1	10.9	150	76	23.8	8	11.1	17.2	3.6	7.9	8.1	7.8	25.8	1.5	12.1	16.5	0	7.4	6.6	7.6	18.4	2.6	8.7	15.3	1	6.8	6.8	7.5
141	2	51	170	70	M	141	75	11.4	4.7	5.1	10	2.8	4.3	10.1	10.9	150	76	20	0	9.2	18	6.8	8.4	8.1	7.8	25.2	5.2	11.8	15.9	0	7.1	6.6	7.6	18.8	3.6	8.9	15.5	0	6.9	6.8	7.5
141	2	51	170	70	M	141	75	12.1	5.1	5.5	10.8	3.5	4.7	10.1	10.9	150	76	21	7.6	9.7	17.7	5.6	8.2	8.1	7.8	25.6	7.4	12.1	14.8	0	6.8	6.6	7.6	18.5	5.6	8.8	15.1	0	6.9	6.8	7.5
141	2	51	170	70	M	141	75	11.9	4.7	5.4	10.3	1.3	4.5	10.1	10.9	150	76	19.6	0	9.1	18.1	3.6	8.3	8.1	7.8	24.5	3.7	11.6	14.8	0	6.8	6.6	7.6	19.9	3.1	9.5	13.9	0	6.2	6.8	7.5
